# Supplementary material for: Synthesis and Investigations of Building Blocks with Dibenzo[b,f] Oxepine for Use in Photopharmacology
Source: MDPI journal article supplement (doi:10.3390/ijms222011033), 2021-10-13
Supplement: s1 [file s1]

# Synthesis and investigations of building blocks with dibenzo[*b,f*] oxepine for use in photopharmacology

Piotr Tobiasz,<sup>1</sup> Filip Borys,<sup>1,2</sup> Marta Borecka,<sup>1</sup> and Hanna Krawczyk,<sup>\*1</sup>

- 1 Department of Organic Chemistry, Faculty of Chemistry, Warsaw University of Technology, Noakowskiego 3, 00-664 Warsaw, Poland.  
hkraw@ch.pw.edu.pl
- 2 Laboratory of Cytoskeleton and Cilia Biology Nencki Institute of Experimental Biology of Polish Academy of Sciences, 3 Pasteur Street, 02-093 Warsaw, Poland.
- \* Correspondence: hkraw@ch.pw.edu.pl (H.K.)

## Supporting Information

### Table of Contents:

|                                      |    |
|--------------------------------------|----|
| 1. Computational aspects             | 2  |
| 2. Experimental section              | 27 |
| 3. NMR spectra of obtained compounds | 35 |
| 4. Table 2S                          | 95 |
| References                           | 96 |

## 1. Computational aspects

The optimum ground-state geometry for (**1a,1c, 1e, 1f, 1h, E and Z 2f, 3e, and 5a-5e**) compounds was calculated using the density functional theory (DFT). In calculation, the B3LYP functional and 6-311++g(2d,p) for (**E and Z 2f**) and /6-31G\* for (**3e and 5a-5e**) basis set was employed and the continuum model (PCM; Gaussian 03W) [1,2] was used to simulate the effects of the solvent. All the calculations were performed on a server equipped with a 16 quad-core XEON (R) CPU E7310 processor operating at 1.60 GHz. The operating system was Open SUSE 10.3. in DMSO as a solvent.

- The calculated coordinates of (**1a**) ( the part of calculated log file) -

Standard orientation:

| Center<br>Number | Atomic<br>Number | Atomic<br>Type | Coordinates (Angstroms) |           |           |
|------------------|------------------|----------------|-------------------------|-----------|-----------|
|                  |                  |                | X                       | Y         | Z         |
| 1                | 6                | 0              | -3.278899               | 0.697497  | -0.161357 |
| 2                | 6                | 0              | -3.637068               | -0.612732 | -0.535229 |
| 3                | 6                | 0              | -2.728121               | -1.651760 | -0.397850 |
| 4                | 6                | 0              | -1.423456               | -1.457357 | 0.096675  |
| 5                | 6                | 0              | -1.090580               | -0.140855 | 0.472591  |
| 6                | 6                | 0              | -1.983918               | 0.913838  | 0.347841  |
| 7                | 6                | 0              | -0.504551               | -2.583824 | 0.208374  |
| 8                | 6                | 0              | 0.846777                | -2.558040 | 0.220614  |
| 9                | 6                | 0              | 1.710606                | -1.386086 | 0.073210  |
| 10               | 6                | 0              | 1.295170                | -0.085050 | 0.419184  |
| 11               | 8                | 0              | 0.113496                | 0.137188  | 1.111961  |
| 12               | 6                | 0              | 3.001235                | -1.543697 | -0.465965 |
| 13               | 6                | 0              | 3.841162                | -0.452452 | -0.671149 |
| 14               | 6                | 0              | 3.407807                | 0.831563  | -0.341806 |
| 15               | 6                | 0              | 2.134192                | 1.018118  | 0.203252  |
| 16               | 7                | 0              | -4.198006               | 1.734211  | -0.219841 |
| 17               | 8                | 0              | 1.724860                | 2.274486  | 0.594443  |
| 18               | 6                | 0              | 1.226382                | 3.086179  | -0.472046 |
| 19               | 1                | 0              | -4.634177               | -0.806803 | -0.922532 |
| 20               | 1                | 0              | -3.026312               | -2.656295 | -0.689854 |
| 21               | 1                | 0              | -1.676996               | 1.899387  | 0.685693  |
| 22               | 1                | 0              | -0.980559               | -3.563597 | 0.218739  |
| 23               | 1                | 0              | 1.366740                | -3.513966 | 0.240304  |

|    |   |   |           |           |           |
|----|---|---|-----------|-----------|-----------|
| 24 | 1 | 0 | 3.336827  | -2.544217 | -0.727133 |
| 25 | 1 | 0 | 4.835546  | -0.600917 | -1.082775 |
| 26 | 1 | 0 | 4.051104  | 1.696801  | -0.475110 |
| 27 | 1 | 0 | -3.812029 | 2.670922  | -0.263055 |
| 28 | 1 | 0 | -4.966887 | 1.608358  | -0.868966 |
| 29 | 1 | 0 | 0.969827  | 4.052353  | -0.031135 |
| 30 | 1 | 0 | 1.985080  | 3.232953  | -1.251755 |
| 31 | 1 | 0 | 0.330603  | 2.640097  | -0.922792 |

-----  
After PCM corrections, the SCF energy is -784.596325046 a.u.

Visualization of calculated geometry of (**1a**) :

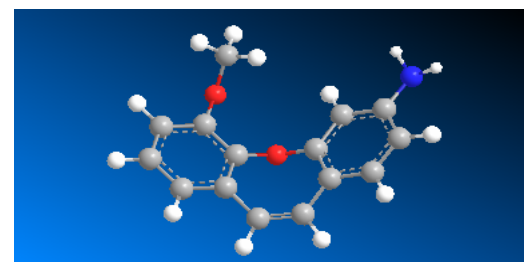

- The calculated coordinates of (**1c**) ( the part of calculated log file) -

Standard orientation:

| Center<br>Number | Atomic<br>Number | Atomic<br>Type | Coordinates (Angstroms) |           |           |
|------------------|------------------|----------------|-------------------------|-----------|-----------|
|                  |                  |                | X                       | Y         | Z         |
| 1                | 6                | 0              | -3.896988               | -0.633507 | 0.425285  |
| 2                | 6                | 0              | -4.027770               | 0.735629  | 0.730084  |
| 3                | 6                | 0              | -2.999106               | 1.618159  | 0.433640  |
| 4                | 6                | 0              | -1.792939               | 1.202988  | -0.163857 |
| 5                | 6                | 0              | -1.691783               | -0.167850 | -0.477260 |
| 6                | 6                | 0              | -2.707611               | -1.068413 | -0.189547 |
| 7                | 6                | 0              | -0.736828               | 2.171981  | -0.432578 |
| 8                | 6                | 0              | 0.589971                | 1.944110  | -0.556077 |
| 9                | 6                | 0              | 1.278847                | 0.661369  | -0.411595 |
| 10               | 6                | 0              | 0.653704                | -0.574332 | -0.646080 |

|    |   |   |           |           |           |
|----|---|---|-----------|-----------|-----------|
| 11 | 8 | 0 | -0.617639 | -0.654655 | -1.213985 |
| 12 | 6 | 0 | 2.625944  | 0.651922  | 0.007193  |
| 13 | 6 | 0 | 3.315589  | -0.546290 | 0.202466  |
| 14 | 6 | 0 | 2.662341  | -1.767525 | -0.021883 |
| 15 | 6 | 0 | 1.337454  | -1.772490 | -0.442929 |
| 16 | 7 | 0 | -4.891966 | -1.539973 | 0.762197  |
| 17 | 8 | 0 | 4.618717  | -0.635348 | 0.606939  |
| 18 | 6 | 0 | 5.334155  | 0.571166  | 0.840575  |
| 19 | 1 | 0 | -4.941352 | 1.097514  | 1.195165  |
| 20 | 1 | 0 | -3.121784 | 2.672093  | 0.673530  |
| 21 | 1 | 0 | -2.578056 | -2.109562 | -0.471661 |
| 22 | 1 | 0 | -1.065440 | 3.210029  | -0.467274 |
| 23 | 1 | 0 | 1.238948  | 2.808737  | -0.682393 |
| 24 | 1 | 0 | 3.110909  | 1.605838  | 0.183767  |
| 25 | 1 | 0 | 3.209029  | -2.693690 | 0.126313  |
| 26 | 1 | 0 | 0.822748  | -2.706966 | -0.645420 |
| 27 | 1 | 0 | -4.896950 | -2.408145 | 0.237858  |
| 28 | 1 | 0 | -5.824095 | -1.154211 | 0.866889  |
| 29 | 1 | 0 | 6.337262  | 0.269716  | 1.147722  |
| 30 | 1 | 0 | 5.401402  | 1.182505  | -0.068662 |
| 31 | 1 | 0 | 4.872629  | 1.164474  | 1.640533  |

-----  
After PCM corrections, the SCF energy is -784.604019661 a.u.

Visualization of calculated geometry of (**1c**) :

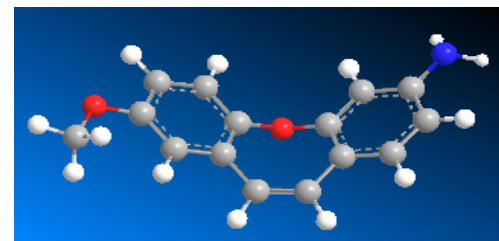

- The calculated coordinates of (**1e**) ( the part of calculated log file) -

Standard orientation:

| Center<br>Number | Atomic<br>Number | Atomic<br>Type | Coordinates (Angstroms) |   |   |
|------------------|------------------|----------------|-------------------------|---|---|
|                  |                  |                | X                       | Y | Z |

-----

|    |   |   |           |           |           |
|----|---|---|-----------|-----------|-----------|
| 1  | 6 | 0 | 4.249356  | -0.939630 | -0.439081 |
| 2  | 6 | 0 | 4.603264  | 0.404977  | -0.664291 |
| 3  | 6 | 0 | 3.723492  | 1.424257  | -0.329321 |
| 4  | 6 | 0 | 2.455105  | 1.177603  | 0.231621  |
| 5  | 6 | 0 | 2.130696  | -0.174038 | 0.466017  |
| 6  | 6 | 0 | 2.993751  | -1.209836 | 0.136826  |
| 7  | 6 | 0 | 1.562232  | 2.289000  | 0.539682  |
| 8  | 6 | 0 | 0.213664  | 2.269837  | 0.632291  |
| 9  | 6 | 0 | -0.666041 | 1.121684  | 0.418344  |
| 10 | 6 | 0 | -0.252358 | -0.207771 | 0.593261  |
| 11 | 8 | 0 | 0.978845  | -0.523655 | 1.164117  |
| 12 | 6 | 0 | -1.991589 | 1.340402  | -0.013566 |
| 13 | 6 | 0 | -2.867384 | 0.289470  | -0.281378 |
| 14 | 6 | 0 | -2.420578 | -1.039431 | -0.099537 |
| 15 | 6 | 0 | -1.117466 | -1.268745 | 0.332955  |
| 16 | 7 | 0 | 5.093270  | -1.975377 | -0.816026 |
| 17 | 8 | 0 | -4.150248 | 0.437438  | -0.727827 |
| 18 | 6 | 0 | -4.651742 | 1.758016  | -0.899346 |
| 19 | 8 | 0 | -3.222968 | -2.117555 | -0.386870 |
| 20 | 6 | 0 | -4.333882 | -2.315616 | 0.497807  |
| 21 | 1 | 0 | 5.572059  | 0.640005  | -1.098145 |
| 22 | 1 | 0 | 4.017727  | 2.456055  | -0.508784 |
| 23 | 1 | 0 | 2.693273  | -2.230192 | 0.358226  |
| 24 | 1 | 0 | 2.051339  | 3.257786  | 0.633763  |
| 25 | 1 | 0 | -0.292497 | 3.219717  | 0.794972  |
| 26 | 1 | 0 | -2.315531 | 2.365815  | -0.154408 |
| 27 | 1 | 0 | -0.783379 | -2.288958 | 0.490818  |
| 28 | 1 | 0 | 4.949710  | -2.858333 | -0.337961 |
| 29 | 1 | 0 | 6.077047  | -1.738456 | -0.885165 |
| 30 | 1 | 0 | -5.679944 | 1.642894  | -1.246447 |
| 31 | 1 | 0 | -4.645780 | 2.316183  | 0.045462  |
| 32 | 1 | 0 | -4.073831 | 2.311384  | -1.650445 |
| 33 | 1 | 0 | -4.831954 | -3.226386 | 0.157383  |
| 34 | 1 | 0 | -3.986692 | -2.455483 | 1.529602  |
| 35 | 1 | 0 | -5.032590 | -1.475286 | 0.454240  |

-----  
After PCM corrections, the SCF energy is -899.119880495 a.u.

Visualization of calculated geometry of (**1e**) :

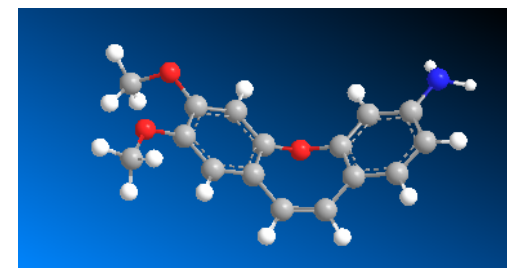

- The calculated coordinates of (**1f**) ( the part of calculated log file) -  
Standard orientation:

| Center<br>Number | Atomic<br>Number | Atomic<br>Type | Coordinates (Angstroms) |           |           |
|------------------|------------------|----------------|-------------------------|-----------|-----------|
|                  |                  |                | X                       | Y         | Z         |
| 1                | 6                | 0              | 3.180548                | -0.696558 | -0.212032 |
| 2                | 6                | 0              | 3.376480                | 0.663961  | -0.519840 |
| 3                | 6                | 0              | 2.345744                | 1.575566  | -0.341794 |
| 4                | 6                | 0              | 1.075025                | 1.199709  | 0.135883  |
| 5                | 6                | 0              | 0.908741                | -0.162678 | 0.456729  |
| 6                | 6                | 0              | 1.924426                | -1.092358 | 0.285158  |
| 7                | 6                | 0              | 0.020321                | 2.196773  | 0.276453  |
| 8                | 6                | 0              | -1.316608               | 1.997844  | 0.267362  |
| 9                | 6                | 0              | -2.019289               | 0.728394  | 0.082663  |
| 10               | 6                | 0              | -1.454106               | -0.521896 | 0.403111  |
| 11               | 8                | 0              | -0.245701               | -0.616498 | 1.087932  |
| 12               | 6                | 0              | -3.320338               | 0.724425  | -0.456028 |
| 13               | 6                | 0              | -4.016239               | -0.459855 | -0.687599 |
| 14               | 6                | 0              | -3.422003               | -1.685455 | -0.379097 |
| 15               | 6                | 0              | -2.137759               | -1.712111 | 0.167783  |
| 16               | 7                | 0              | 4.180522                | -1.632552 | -0.434107 |
| 17               | 1                | 0              | 4.341302                | 0.996505  | -0.894575 |
| 18               | 1                | 0              | 2.518551                | 2.622006  | -0.583488 |
| 19               | 1                | 0              | 1.740699                | -2.125127 | 0.567818  |
| 20               | 1                | 0              | 0.367323                | 3.228271  | 0.323127  |
| 21               | 1                | 0              | -1.955535               | 2.878137  | 0.308354  |
| 22               | 1                | 0              | -3.781954               | 1.678761  | -0.699205 |
| 23               | 1                | 0              | -5.019056               | -0.425983 | -1.104310 |
| 24               | 1                | 0              | -3.956601               | -2.615967 | -0.548912 |
| 25               | 1                | 0              | -1.660207               | -2.647704 | 0.443208  |
| 26               | 1                | 0              | 4.109681                | -2.492216 | 0.099327  |
| 27               | 1                | 0              | 5.128096                | -1.271410 | -0.448565 |

After PCM corrections, the SCF energy is -670.081543145 a.u.

Visualization of calculated geometry of (**1f**) :

- The calculated coordinates of (**1h**) ( the part of calculated log file) -

Standard orientation:

| Center<br>Number | Atomic<br>Number | Atomic<br>Type | Coordinates (Angstroms) |           |           |
|------------------|------------------|----------------|-------------------------|-----------|-----------|
|                  |                  |                | X                       | Y         | Z         |
| 1                | 6                | 0              | 4.116657                | -0.785623 | -0.402910 |
| 2                | 6                | 0              | 4.333612                | 0.568050  | -0.729872 |
| 3                | 6                | 0              | 3.355619                | 1.514930  | -0.467522 |
| 4                | 6                | 0              | 2.116414                | 1.184696  | 0.117040  |
| 5                | 6                | 0              | 1.932039                | -0.170584 | 0.451201  |
| 6                | 6                | 0              | 2.892571                | -1.136849 | 0.200679  |
| 7                | 6                | 0              | 1.117147                | 2.219633  | 0.338921  |
| 8                | 6                | 0              | -0.220691               | 2.077942  | 0.467415  |
| 9                | 6                | 0              | -0.988120               | 0.836800  | 0.381761  |
| 10               | 6                | 0              | -0.446344               | -0.440611 | 0.655321  |
| 11               | 8                | 0              | 0.818123                | -0.597940 | 1.179141  |
| 12               | 6                | 0              | -2.340365               | 0.891926  | 0.014717  |
| 13               | 6                | 0              | -3.094922               | -0.273602 | -0.093406 |
| 14               | 6                | 0              | -2.549399               | -1.532341 | 0.160636  |
| 15               | 6                | 0              | -1.213140               | -1.602108 | 0.536109  |
| 16               | 7                | 0              | 5.057471                | -1.753505 | -0.702186 |
| 17               | 7                | 0              | -4.501639               | -0.173034 | -0.477383 |
| 18               | 8                | 0              | -5.155787               | -1.215918 | -0.565406 |
| 19               | 8                | 0              | -4.968755               | 0.948247  | -0.695527 |
| 20               | 1                | 0              | 5.274259                | 0.866217  | -1.185634 |
| 21               | 1                | 0              | 3.543534                | 2.554492  | -0.726024 |
| 22               | 1                | 0              | 2.697064                | -2.161853 | 0.502197  |
| 23               | 1                | 0              | 1.503898                | 3.237619  | 0.332003  |
| 24               | 1                | 0              | -0.818131               | 2.982589  | 0.555740  |
| 25               | 1                | 0              | -2.808671               | 1.848069  | -0.187674 |
| 26               | 1                | 0              | -3.161147               | -2.421212 | 0.073021  |
| 27               | 1                | 0              | -0.747792               | -2.554925 | 0.766373  |
| 28               | 1                | 0              | 4.998710                | -2.620307 | -0.179516 |

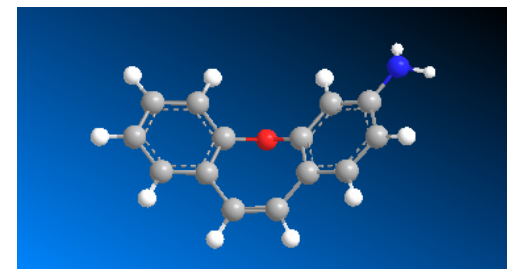

29                      1                      0                      6.012323                      -1.433575                      -0.819695

-----  
After PCM corrections, the SCF energy is -874.587173635                      a.u.

Visualization of calculated geometry of (**1h**) :

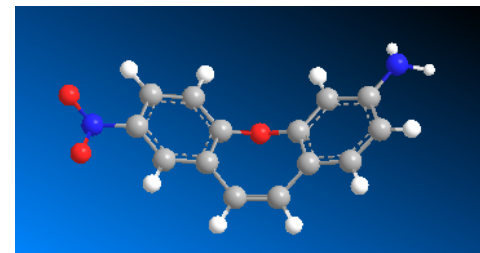

- The plane and dihedral angles in amines **1a**, **1c**, **1e**, **1f**, **1h**.

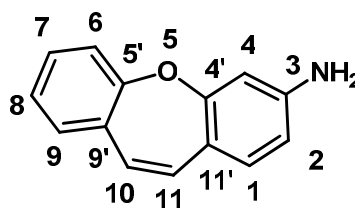

| Compound       | Angle [°]      |                |                |                |           |             |              |              |             |              |             |
|----------------|----------------|----------------|----------------|----------------|-----------|-------------|--------------|--------------|-------------|--------------|-------------|
|                | NC3C2          | NC3C4          | NC3C2C1        | NC3C4C4'       | O5C4'C4C3 | O5C4'C11'C1 | O5C4'C11'C11 | C11C11'C4'C4 | C11C11'C1C2 | C5'O5C4'C11' | C4'O5C5'C9' |
| <b>1f</b>      | 121.1          | 120.7          | 177.4          | -177.4         | -173.2    | 172.1       | -7.8         | 178.6        | -178.7      | <b>64.9</b>  | <b>65.9</b> |
| <b>1a</b>      | 121.0          | 120.7          | 176.3          | -176.5         | -173.5    | 172.7       | -6.8         | 179.6        | -179.4      | <b>64.4</b>  | <b>67.3</b> |
| <b>1c</b>      | 121.1          | 120.7          | 177.4          | -177.4         | -173.2    | 172.1       | -7.6         | 179.0        | -179.0      | <b>64.9</b>  | <b>66.7</b> |
| <b>1e</b>      | 121.1          | 120.7          | 177.4          | -177.5         | -173.1    | 172.1       | -7.8         | 178.7        | -178.8      | <b>64.7</b>  | <b>66.2</b> |
| <b>1h</b>      | 121.2          | 120.6          | 177.5          | -177.5         | -173.4    | 172.2       | -7.9         | 178.6        | -178.6      | <b>62.6</b>  | <b>62.9</b> |
| <b>aniline</b> | NC1C2<br>120.9 | NC1C6<br>120.9 | NC1C2C3<br>180 | NC1C6C5<br>0.0 | -         | -           | -            | -            | -           |              |             |



- The calculated coordinates of (*E-2f*) ( the part of calculated log file) -

Standard orientation:

| Center<br>Number | Atomic<br>Number | Atomic<br>Type | Coordinates (Angstroms) |           |           |
|------------------|------------------|----------------|-------------------------|-----------|-----------|
|                  |                  |                | X                       | Y         | Z         |
| 1                | 6                | 0              | -7.328920               | -2.043166 | 1.862103  |
| 2                | 6                | 0              | -8.138204               | -0.943905 | 2.134217  |
| 3                | 6                | 0              | -7.943091               | 0.243592  | 1.443265  |
| 4                | 6                | 0              | -6.937024               | 0.373413  | 0.473154  |
| 5                | 6                | 0              | -6.147704               | -0.756060 | 0.209864  |
| 6                | 6                | 0              | -6.332478               | -1.946913 | 0.895740  |
| 7                | 6                | 0              | -6.751496               | 1.652090  | -0.204459 |
| 8                | 6                | 0              | -5.617355               | 2.135324  | -0.744814 |
| 9                | 6                | 0              | -4.313139               | 1.488910  | -0.774150 |
| 10               | 6                | 0              | -4.144246               | 0.096531  | -0.738371 |
| 11               | 8                | 0              | -5.232408               | -0.759959 | -0.838184 |
| 12               | 6                | 0              | -3.147526               | 2.277287  | -0.835634 |
| 13               | 6                | 0              | -1.883782               | 1.722725  | -0.831632 |
| 14               | 6                | 0              | -1.743235               | 0.328836  | -0.773107 |
| 15               | 6                | 0              | -2.884727               | -0.476236 | -0.730466 |
| 16               | 7                | 0              | -0.512876               | -0.364081 | -0.771336 |
| 17               | 7                | 0              | 0.512658                | 0.360958  | -0.772457 |
| 18               | 6                | 0              | 1.743225                | -0.331581 | -0.773310 |
| 19               | 6                | 0              | 2.884331                | 0.474057  | -0.731318 |
| 20               | 6                | 0              | 4.144138                | -0.098042 | -0.738240 |
| 21               | 6                | 0              | 4.313757                | -1.490380 | -0.772399 |
| 22               | 6                | 0              | 3.148460                | -2.279442 | -0.833574 |
| 23               | 6                | 0              | 1.884418                | -1.725475 | -0.830468 |
| 24               | 8                | 0              | 5.231759                | 0.759017  | -0.838752 |
| 25               | 6                | 0              | 6.147228                | 0.756880  | 0.209084  |
| 26               | 6                | 0              | 6.937021                | -0.371802 | 0.474031  |
| 27               | 6                | 0              | 6.752131                | -1.651565 | -0.201632 |
| 28               | 6                | 0              | 5.618398                | -2.136023 | -0.741688 |
| 29               | 6                | 0              | 6.331598                | 1.948885  | 0.893137  |
| 30               | 6                | 0              | 7.328077                | 2.047071  | 1.859208  |

|    |   |   |           |           |           |
|----|---|---|-----------|-----------|-----------|
| 31 | 6 | 0 | 8.137855  | 0.948544  | 2.132952  |
| 32 | 6 | 0 | 7.943133  | -0.240060 | 1.443880  |
| 33 | 1 | 0 | -8.922524 | -1.013804 | 2.878097  |
| 34 | 1 | 0 | -8.574746 | 1.099848  | 1.652819  |
| 35 | 1 | 0 | -5.706924 | -2.795650 | 0.647518  |
| 36 | 1 | 0 | -7.612666 | 2.312965  | -0.185639 |
| 37 | 1 | 0 | -5.638654 | 3.152695  | -1.122753 |
| 38 | 1 | 0 | -3.257684 | 3.355131  | -0.882534 |
| 39 | 1 | 0 | -1.003011 | 2.347893  | -0.878183 |
| 40 | 1 | 0 | -2.781346 | -1.553931 | -0.715059 |
| 41 | 1 | 0 | 2.780417  | 1.551717  | -0.717121 |
| 42 | 1 | 0 | 3.259156  | -3.357280 | -0.879357 |
| 43 | 1 | 0 | 1.003958  | -2.351111 | -0.876650 |
| 44 | 1 | 0 | 7.613588  | -2.312031 | -0.181667 |
| 45 | 1 | 0 | 5.640331  | -3.153892 | -1.118254 |
| 46 | 1 | 0 | 5.705591  | 2.796924  | 0.643684  |
| 47 | 1 | 0 | 8.922238  | 1.019941  | 2.876618  |
| 48 | 1 | 0 | 8.575141  | -1.095761 | 1.654634  |
| 49 | 1 | 0 | -7.478487 | -2.977930 | 2.388998  |
| 50 | 1 | 0 | 7.477287  | 2.982714  | 2.384645  |

-----  
 After PCM corrections, the SCF energy is -1338.08051424 a.u.

Visualization of calculated geometry of (*E*-2f)

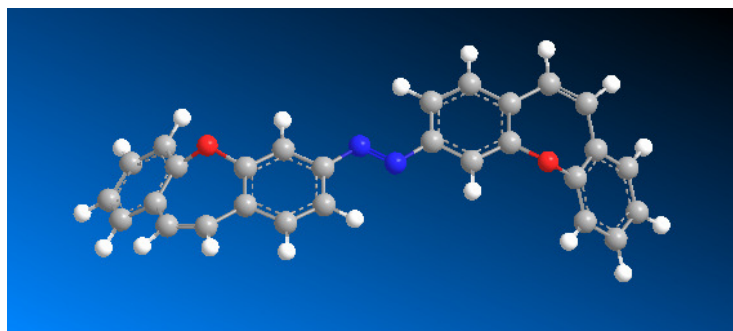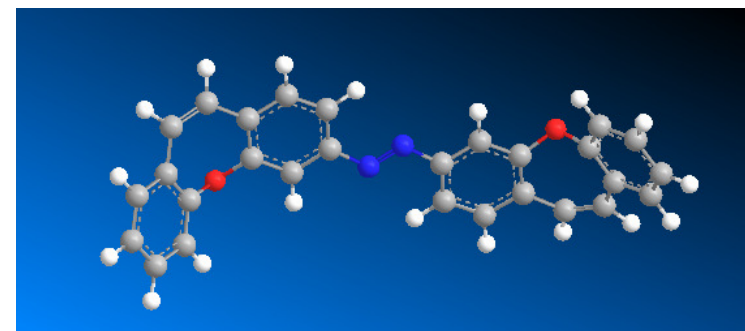

- The calculated coordinates of (**Z-2f**) ( the part of calculated log file) -  
Standard orientation:

| Center<br>Number | Atomic<br>Number | Atomic<br>Type | Coordinates (Angstroms) |           |           |
|------------------|------------------|----------------|-------------------------|-----------|-----------|
|                  |                  |                | X                       | Y         | Z         |
| 1                | 6                | 0              | 7.169710                | 0.365357  | -1.367856 |
| 2                | 6                | 0              | 7.541249                | 1.192695  | -0.312150 |
| 3                | 6                | 0              | 6.723969                | 1.294168  | 0.804743  |
| 4                | 6                | 0              | 5.516308                | 0.585713  | 0.900336  |
| 5                | 6                | 0              | 5.176772                | -0.251802 | -0.171952 |
| 6                | 6                | 0              | 5.983975                | -0.359054 | -1.294224 |
| 7                | 6                | 0              | 4.676945                | 0.751776  | 2.082795  |
| 8                | 6                | 0              | 3.343691                | 0.597384  | 2.167597  |
| 9                | 6                | 0              | 2.428472                | 0.222534  | 1.096681  |
| 10               | 6                | 0              | 2.818898                | -0.531849 | -0.021810 |
| 11               | 8                | 0              | 4.079025                | -1.105466 | -0.096658 |
| 12               | 6                | 0              | 1.087994                | 0.636116  | 1.152585  |
| 13               | 6                | 0              | 0.176417                | 0.315369  | 0.162101  |
| 14               | 6                | 0              | 0.597081                | -0.432624 | -0.940243 |
| 15               | 6                | 0              | 1.932396                | -0.823034 | -1.043587 |
| 16               | 7                | 0              | -0.232942               | -0.689898 | -2.078556 |
| 17               | 7                | 0              | -1.401714               | -1.107645 | -2.006181 |
| 18               | 6                | 0              | -1.986145               | -1.600856 | -0.792785 |
| 19               | 6                | 0              | -1.402715               | -2.662407 | -0.096521 |
| 20               | 6                | 0              | -2.092276               | -3.264370 | 0.946008  |
| 21               | 6                | 0              | -3.348535               | -2.800811 | 1.310538  |
| 22               | 6                | 0              | -3.957176               | -1.734590 | 0.632662  |
| 23               | 6                | 0              | -3.269066               | -1.167054 | -0.447784 |
| 24               | 6                | 0              | -5.262450               | -1.250435 | 1.075733  |
| 25               | 6                | 0              | -5.755750               | -0.006845 | 0.945375  |
| 26               | 6                | 0              | -5.110753               | 1.142145  | 0.316611  |
| 27               | 6                | 0              | -4.152913               | 1.018513  | -0.700070 |
| 28               | 8                | 0              | -3.872597               | -0.225060 | -1.261866 |
| 29               | 6                | 0              | -5.447634               | 2.441279  | 0.726387  |
| 30               | 6                | 0              | -4.845192               | 3.559086  | 0.166479  |

|    |   |   |           |           |           |
|----|---|---|-----------|-----------|-----------|
| 31 | 6 | 0 | -3.889707 | 3.403592  | -0.833703 |
| 32 | 6 | 0 | -3.545021 | 2.127423  | -1.268667 |
| 33 | 1 | 0 | 8.467335  | 1.752859  | -0.356863 |
| 34 | 1 | 0 | 7.013672  | 1.937146  | 1.628608  |
| 35 | 1 | 0 | 5.685213  | -1.030105 | -2.090320 |
| 36 | 1 | 0 | 5.190519  | 1.125539  | 2.963247  |
| 37 | 1 | 0 | 2.869827  | 0.858969  | 3.108570  |
| 38 | 1 | 0 | 0.762487  | 1.226176  | 2.002035  |
| 39 | 1 | 0 | -0.846384 | 0.658152  | 0.236517  |
| 40 | 1 | 0 | 2.271865  | -1.387937 | -1.903110 |
| 41 | 1 | 0 | -0.430004 | -3.029952 | -0.397820 |
| 42 | 1 | 0 | -1.647848 | -4.099309 | 1.473763  |
| 43 | 1 | 0 | -3.878853 | -3.265369 | 2.133939  |
| 44 | 1 | 0 | -5.845481 | -1.961990 | 1.651874  |
| 45 | 1 | 0 | -6.706231 | 0.203996  | 1.425883  |
| 46 | 1 | 0 | -6.195895 | 2.563107  | 1.501827  |
| 47 | 1 | 0 | -5.125062 | 4.549591  | 0.504181  |
| 48 | 1 | 0 | -2.826981 | 1.980074  | -2.066044 |
| 49 | 1 | 0 | -3.422273 | 4.270311  | -1.285400 |
| 50 | 1 | 0 | 7.803984  | 0.271226  | -2.241211 |

-----  
 After PCM corrections, the SCF energy is -1338.05417174 a.u.

Visualization of calculated geometry of (**Z-2f**)

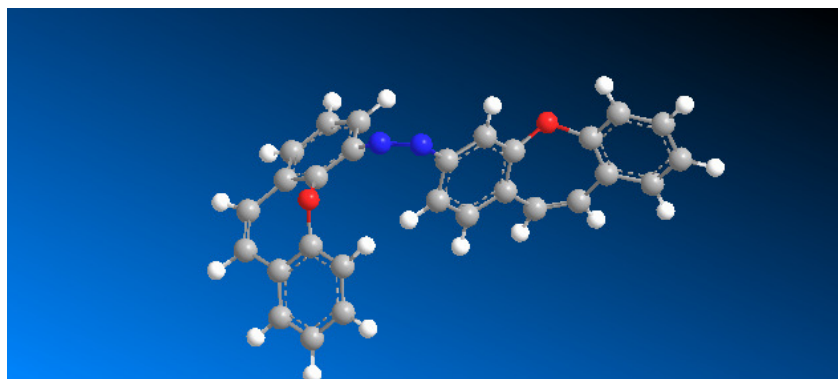

- The calculated coordinates for (**3a-3d**) compounds are in our publication - M. Wrzesiński, D. Mielecki, P. Szczeciński, E. Grzesiuk, H. Krawczyk, *Tetrahedron* 72 (2016) 3877-3884 and the calculated coordinates of (**3e**) is presented:
- The calculated coordinates of (**3e**)( the part of calculated log file) -

Standard orientation:

| Center<br>Number | Atomic<br>Number | Atomic<br>Type | Coordinates (Angstroms) |           |           |
|------------------|------------------|----------------|-------------------------|-----------|-----------|
|                  |                  |                | X                       | Y         | Z         |
| 1                | 6                | 0              | -3.781824               | -0.285578 | 0.192762  |
| 2                | 6                | 0              | -4.038498               | 1.056305  | 0.474751  |
| 3                | 6                | 0              | -3.044170               | 1.987932  | 0.209395  |
| 4                | 6                | 0              | -1.794998               | 1.615408  | -0.326999 |
| 5                | 6                | 0              | -1.591931               | 0.247332  | -0.618264 |
| 6                | 6                | 0              | -2.566867               | -0.703673 | -0.351743 |
| 7                | 6                | 0              | -0.777290               | 2.636441  | -0.550739 |
| 8                | 6                | 0              | 0.564060                | 2.463020  | -0.563870 |
| 9                | 6                | 0              | 1.307469                | 1.219954  | -0.384488 |
| 10               | 6                | 0              | 0.769127                | -0.042961 | -0.669651 |
| 11               | 8                | 0              | -0.467036               | -0.178854 | -1.302449 |
| 12               | 6                | 0              | 2.626398                | 1.273156  | 0.114034  |
| 13               | 6                | 0              | 3.375089                | 0.120036  | 0.341881  |
| 14               | 6                | 0              | 2.805007                | -1.140352 | 0.039674  |
| 15               | 6                | 0              | 1.506594                | -1.203927 | -0.461016 |
| 16               | 8                | 0              | 4.637747                | 0.100392  | 0.854958  |
| 17               | 6                | 0              | 5.263317                | 1.344961  | 1.153342  |
| 18               | 8                | 0              | 3.470843                | -2.313228 | 0.276574  |
| 19               | 6                | 0              | 4.636957                | -2.554619 | -0.526373 |
| 20               | 7                | 0              | -4.815214               | -1.282656 | 0.459212  |
| 21               | 8                | 0              | -5.883818               | -0.896722 | 0.941728  |
| 22               | 8                | 0              | -4.569076               | -2.462346 | 0.192030  |
| 23               | 1                | 0              | -4.994545               | 1.350666  | 0.888760  |
| 24               | 1                | 0              | -3.226359               | 3.037022  | 0.425190  |
| 25               | 1                | 0              | -2.393132               | -1.745031 | -0.591046 |
| 26               | 1                | 0              | -1.151297               | 3.656016  | -0.613897 |

|    |   |   |          |           |           |
|----|---|---|----------|-----------|-----------|
| 27 | 1 | 0 | 1.176048 | 3.360139  | -0.639026 |
| 28 | 1 | 0 | 3.045303 | 2.247195  | 0.341545  |
| 29 | 1 | 0 | 1.081161 | -2.170462 | -0.709352 |
| 30 | 1 | 0 | 6.253317 | 1.094095  | 1.537073  |
| 31 | 1 | 0 | 5.366028 | 1.966844  | 0.255369  |
| 32 | 1 | 0 | 4.705103 | 1.898448  | 1.918672  |
| 33 | 1 | 0 | 4.999939 | -3.542394 | -0.234889 |
| 34 | 1 | 0 | 4.374311 | -2.562917 | -1.591567 |
| 35 | 1 | 0 | 5.410707 | -1.805564 | -0.340229 |

-----  
 After PCM corrections, the SCF energy is -1048.26621520 a.u.

Visualization of calculated geometry of (**3e**)

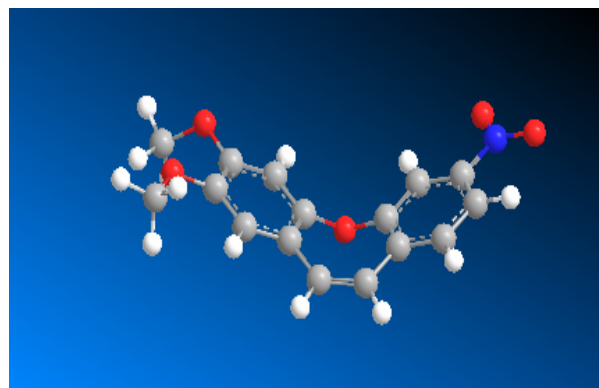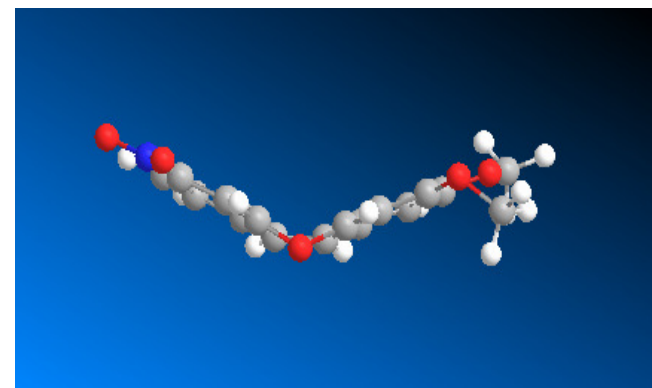

- The calculated coordinates of (**5a**)( the part of calculated log file) -

Standard orientation:

| Center<br>Number | Atomic<br>Number | Atomic<br>Type | Coordinates (Angstroms) |          |           |
|------------------|------------------|----------------|-------------------------|----------|-----------|
|                  |                  |                | X                       | Y        | Z         |
| 1                | 6                | 0              | 5.853200                | 2.802880 | 0.446189  |
| 2                | 6                | 0              | 6.632332                | 2.920973 | -0.701616 |
| 3                | 6                | 0              | 6.098585                | 2.465174 | -1.899221 |
| 4                | 6                | 0              | 4.818885                | 1.880454 | -1.984950 |
| 5                | 6                | 0              | 4.074589                | 1.754526 | -0.788368 |

|    |   |   |           |           |           |
|----|---|---|-----------|-----------|-----------|
| 6  | 6 | 0 | 4.582010  | 2.229546  | 0.415623  |
| 7  | 6 | 0 | 4.323093  | 1.489038  | -3.298460 |
| 8  | 6 | 0 | 3.329272  | 0.625186  | -3.590555 |
| 9  | 6 | 0 | 2.508267  | -0.168647 | -2.682978 |
| 10 | 6 | 0 | 2.342468  | 0.114136  | -1.315428 |
| 11 | 8 | 0 | 2.764096  | 1.315615  | -0.751101 |
| 12 | 6 | 0 | 1.835669  | -1.286227 | -3.203367 |
| 13 | 6 | 0 | 1.021469  | -2.073605 | -2.403858 |
| 14 | 6 | 0 | 0.853364  | -1.801549 | -1.041776 |
| 15 | 6 | 0 | 1.559560  | -0.714091 | -0.489225 |
| 16 | 6 | 0 | -0.150790 | -2.683158 | -0.284062 |
| 17 | 6 | 0 | 0.163448  | -2.999382 | 1.184164  |
| 18 | 6 | 0 | -1.615831 | -2.290979 | -0.533588 |
| 19 | 6 | 0 | -0.718605 | -2.648201 | 2.214455  |
| 20 | 6 | 0 | -0.471104 | -2.962651 | 3.550303  |
| 21 | 6 | 0 | 0.689983  | -3.646284 | 3.911881  |
| 22 | 6 | 0 | 1.592406  | -4.011669 | 2.920552  |
| 23 | 6 | 0 | 1.313836  | -3.708067 | 1.585256  |
| 24 | 6 | 0 | -2.510408 | -3.334480 | -0.812080 |
| 25 | 6 | 0 | -3.841331 | -3.093400 | -1.117633 |
| 26 | 6 | 0 | -4.345627 | -1.784270 | -1.190389 |
| 27 | 6 | 0 | -3.455812 | -0.730605 | -0.922357 |
| 28 | 6 | 0 | -2.113621 | -0.971029 | -0.562062 |
| 29 | 6 | 0 | -5.747476 | -1.593634 | -1.552114 |
| 30 | 6 | 0 | -6.540965 | -0.529334 | -1.312137 |
| 31 | 6 | 0 | -6.188634 | 0.715224  | -0.638119 |
| 32 | 6 | 0 | -4.866195 | 1.204287  | -0.537621 |
| 33 | 8 | 0 | -3.795695 | 0.594862  | -1.167754 |
| 34 | 6 | 0 | -7.218642 | 1.498362  | -0.080292 |
| 35 | 6 | 0 | -6.970985 | 2.709833  | 0.551365  |
| 36 | 6 | 0 | -5.653855 | 3.157594  | 0.615829  |
| 37 | 6 | 0 | -4.598667 | 2.421609  | 0.076825  |
| 38 | 8 | 0 | 1.378892  | -0.407802 | 0.834868  |
| 39 | 6 | 0 | 2.527717  | -0.547761 | 1.680594  |
| 40 | 7 | 0 | 6.368993  | 3.303072  | 1.719914  |
| 41 | 8 | 0 | 7.498864  | 3.797750  | 1.730956  |
| 42 | 8 | 0 | 5.649667  | 3.201785  | 2.717081  |
| 43 | 8 | 0 | -1.275418 | 0.090601  | -0.361051 |
| 44 | 6 | 0 | -1.420522 | 0.795943  | 0.878633  |
| 45 | 7 | 0 | -5.362689 | 4.441507  | 1.255125  |
| 46 | 8 | 0 | -6.307079 | 5.076405  | 1.730425  |
| 47 | 8 | 0 | -4.189126 | 4.818731  | 1.288578  |
| 48 | 7 | 0 | 2.317520  | -4.188894 | 0.620621  |
| 49 | 8 | 0 | 3.501944  | -4.126639 | 0.957342  |
| 50 | 8 | 0 | 1.933859  | -4.660479 | -0.450658 |
| 51 | 1 | 0 | 7.615807  | 3.370398  | -0.650256 |
| 52 | 1 | 0 | 6.678992  | 2.568966  | -2.811621 |

|    |   |   |           |           |           |
|----|---|---|-----------|-----------|-----------|
| 53 | 1 | 0 | 3.982790  | 2.191327  | 1.314929  |
| 54 | 1 | 0 | 4.868366  | 1.920013  | -4.135143 |
| 55 | 1 | 0 | 3.148466  | 0.428569  | -4.645442 |
| 56 | 1 | 0 | 1.954418  | -1.525125 | -4.256624 |
| 57 | 1 | 0 | 0.494565  | -2.915800 | -2.843684 |
| 58 | 1 | 0 | -0.059444 | -3.650812 | -0.782339 |
| 59 | 1 | 0 | -1.629665 | -2.120037 | 1.959798  |
| 60 | 1 | 0 | -1.191862 | -2.671073 | 4.309075  |
| 61 | 1 | 0 | 0.890383  | -3.896338 | 4.949029  |
| 62 | 1 | 0 | 2.506497  | -4.542925 | 3.158876  |
| 63 | 1 | 0 | -2.146763 | -4.358673 | -0.796098 |
| 64 | 1 | 0 | -4.507833 | -3.925317 | -1.328078 |
| 65 | 1 | 0 | -6.216392 | -2.461575 | -2.011447 |
| 66 | 1 | 0 | -7.588805 | -0.615927 | -1.590973 |
| 67 | 1 | 0 | -8.240710 | 1.138146  | -0.156112 |
| 68 | 1 | 0 | -7.769877 | 3.304883  | 0.975133  |
| 69 | 1 | 0 | -3.589566 | 2.809646  | 0.105110  |
| 70 | 1 | 0 | 2.175292  | -0.359429 | 2.696671  |
| 71 | 1 | 0 | 2.942734  | -1.558914 | 1.619984  |
| 72 | 1 | 0 | 3.306275  | 0.172617  | 1.425459  |
| 73 | 1 | 0 | -0.847018 | 1.717919  | 0.769050  |
| 74 | 1 | 0 | -2.468234 | 1.033671  | 1.084281  |
| 75 | 1 | 0 | -1.001708 | 0.214906  | 1.704848  |

-----  
After PCM corrections, the SCF energy is -2341.12490420 a.u.

Visualization of calculated geometry of (**5a**):

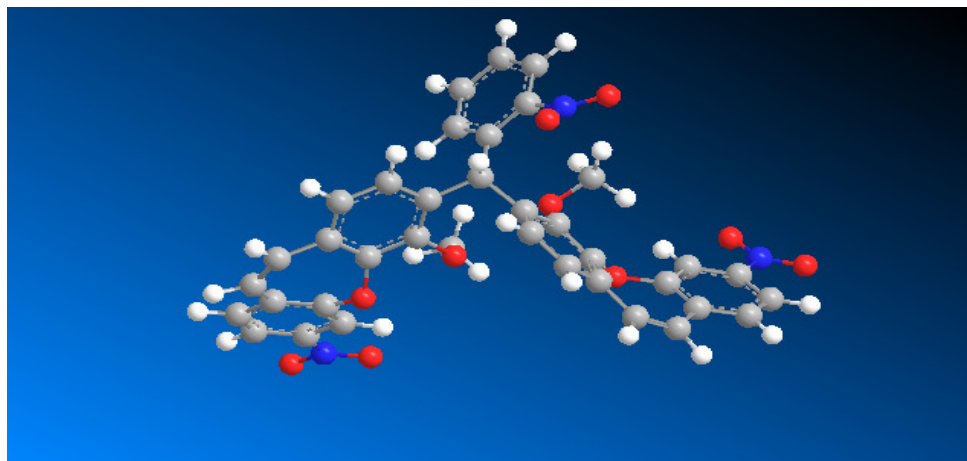



- The calculated coordinates of (**5b**) ( the part of calculated log file) -

Standard orientation:

| Center<br>Number | Atomic<br>Number | Atomic<br>Type | Coordinates (Angstroms) |           |           |
|------------------|------------------|----------------|-------------------------|-----------|-----------|
|                  |                  |                | X                       | Y         | Z         |
| 1                | 6                | 0              | 6.126427                | -1.635286 | -0.283147 |
| 2                | 6                | 0              | 6.697047                | -2.556714 | 0.594969  |
| 3                | 6                | 0              | 5.916004                | -3.622367 | 1.029036  |
| 4                | 6                | 0              | 4.579834                | -3.786843 | 0.612703  |
| 5                | 6                | 0              | 4.046889                | -2.816641 | -0.263135 |
| 6                | 6                | 0              | 4.806798                | -1.746740 | -0.713333 |
| 7                | 6                | 0              | 3.816933                | -4.947175 | 1.073564  |
| 8                | 6                | 0              | 2.474354                | -5.050309 | 1.198378  |
| 9                | 6                | 0              | 1.465201                | -4.031136 | 0.909701  |
| 10               | 6                | 0              | 1.673000                | -3.001134 | -0.022731 |
| 11               | 8                | 0              | 2.798723                | -2.976011 | -0.833785 |
| 12               | 6                | 0              | 0.205734                | -4.095756 | 1.534500  |
| 13               | 6                | 0              | -0.804259               | -3.182605 | 1.235092  |
| 14               | 6                | 0              | -0.586551               | -2.150094 | 0.316122  |
| 15               | 6                | 0              | 0.674608                | -2.068809 | -0.307540 |
| 16               | 6                | 0              | -1.654743               | -1.161732 | -0.152321 |
| 17               | 6                | 0              | -3.010022               | -1.851151 | -0.360770 |
| 18               | 6                | 0              | -1.739975               | 0.075878  | 0.743858  |
| 19               | 6                | 0              | -3.221209               | -2.563351 | -1.553715 |
| 20               | 6                | 0              | -4.418216               | -3.226410 | -1.798380 |
| 21               | 6                | 0              | -5.417756               | -3.177254 | -0.826715 |
| 22               | 6                | 0              | -5.246703               | -2.481052 | 0.367518  |
| 23               | 6                | 0              | -4.042080               | -1.817266 | 0.589765  |
| 24               | 6                | 0              | -1.646229               | 0.009913  | 2.141430  |
| 25               | 6                | 0              | -1.742899               | 1.151060  | 2.929574  |
| 26               | 6                | 0              | -1.896647               | 2.424184  | 2.353878  |
| 27               | 6                | 0              | -1.976033               | 2.490191  | 0.954096  |
| 28               | 6                | 0              | -1.907041               | 1.342089  | 0.153172  |
| 29               | 6                | 0              | -1.954804               | 3.616239  | 3.201797  |
| 30               | 6                | 0              | -1.543832               | 4.863325  | 2.884327  |

|    |   |   |           |           |           |
|----|---|---|-----------|-----------|-----------|
| 31 | 6 | 0 | -0.922391 | 5.271062  | 1.626695  |
| 32 | 6 | 0 | -1.191355 | 4.633138  | 0.396975  |
| 33 | 8 | 0 | -2.213496 | 3.695043  | 0.310072  |
| 34 | 6 | 0 | -0.011486 | 6.344606  | 1.619682  |
| 35 | 6 | 0 | 0.644970  | 6.739319  | 0.462512  |
| 36 | 6 | 0 | 0.386564  | 6.042497  | -0.717869 |
| 37 | 6 | 0 | -0.528419 | 4.989103  | -0.771122 |
| 38 | 7 | 0 | 6.936037  | -0.521179 | -0.787957 |
| 39 | 8 | 0 | 8.124851  | -0.475539 | -0.459447 |
| 40 | 8 | 0 | 6.367554  | 0.348021  | -1.452525 |
| 41 | 8 | 0 | 0.896195  | -1.138979 | -1.290761 |
| 42 | 6 | 0 | 1.512434  | 0.078232  | -0.858670 |
| 43 | 8 | 0 | -1.938333 | 1.487070  | -1.211800 |
| 44 | 6 | 0 | -3.246869 | 1.572507  | -1.794993 |
| 45 | 7 | 0 | 1.106611  | 6.426923  | -1.935418 |
| 46 | 8 | 0 | 1.879555  | 7.385087  | -1.864724 |
| 47 | 8 | 0 | 0.909513  | 5.767663  | -2.956530 |
| 48 | 7 | 0 | -6.684248 | -3.874495 | -1.070957 |
| 49 | 8 | 0 | -7.533073 | -3.864719 | -0.176575 |
| 50 | 8 | 0 | -6.836709 | -4.432919 | -2.159375 |
| 51 | 1 | 0 | 7.724534  | -2.437803 | 0.911067  |
| 52 | 1 | 0 | 6.344836  | -4.357516 | 1.703689  |
| 53 | 1 | 0 | 4.397622  | -1.040660 | -1.423399 |
| 54 | 1 | 0 | 4.418364  | -5.786169 | 1.415385  |
| 55 | 1 | 0 | 2.085699  | -5.968607 | 1.633314  |
| 56 | 1 | 0 | 0.015654  | -4.895792 | 2.244295  |
| 57 | 1 | 0 | -1.778117 | -3.294270 | 1.701409  |
| 58 | 1 | 0 | -1.337526 | -0.809846 | -1.134315 |
| 59 | 1 | 0 | -2.433462 | -2.599011 | -2.301174 |
| 60 | 1 | 0 | -4.586787 | -3.771210 | -2.718459 |
| 61 | 1 | 0 | -6.045449 | -2.461343 | 1.097883  |
| 62 | 1 | 0 | -3.915419 | -1.256709 | 1.509169  |
| 63 | 1 | 0 | -1.490120 | -0.951372 | 2.620336  |
| 64 | 1 | 0 | -1.677084 | 1.066548  | 4.010659  |
| 65 | 1 | 0 | -2.293460 | 3.444777  | 4.221499  |
| 66 | 1 | 0 | -1.572392 | 5.622242  | 3.662336  |
| 67 | 1 | 0 | 0.190103  | 6.864312  | 2.551816  |
| 68 | 1 | 0 | 1.347638  | 7.561473  | 0.460788  |

|    |   |   |           |           |           |
|----|---|---|-----------|-----------|-----------|
| 69 | 1 | 0 | -0.742076 | 4.473749  | -1.697878 |
| 70 | 1 | 0 | 1.543637  | 0.731691  | -1.732225 |
| 71 | 1 | 0 | 0.930975  | 0.558628  | -0.064719 |
| 72 | 1 | 0 | 2.530806  | -0.101761 | -0.495892 |
| 73 | 1 | 0 | -3.092483 | 1.705813  | -2.867402 |
| 74 | 1 | 0 | -3.818110 | 0.654415  | -1.618356 |
| 75 | 1 | 0 | -3.798088 | 2.430848  | -1.395317 |

-----  
After PCM corrections, the SCF energy is -2341.14529953 a.u.

Visualization of calculated geometry of (**5b**):

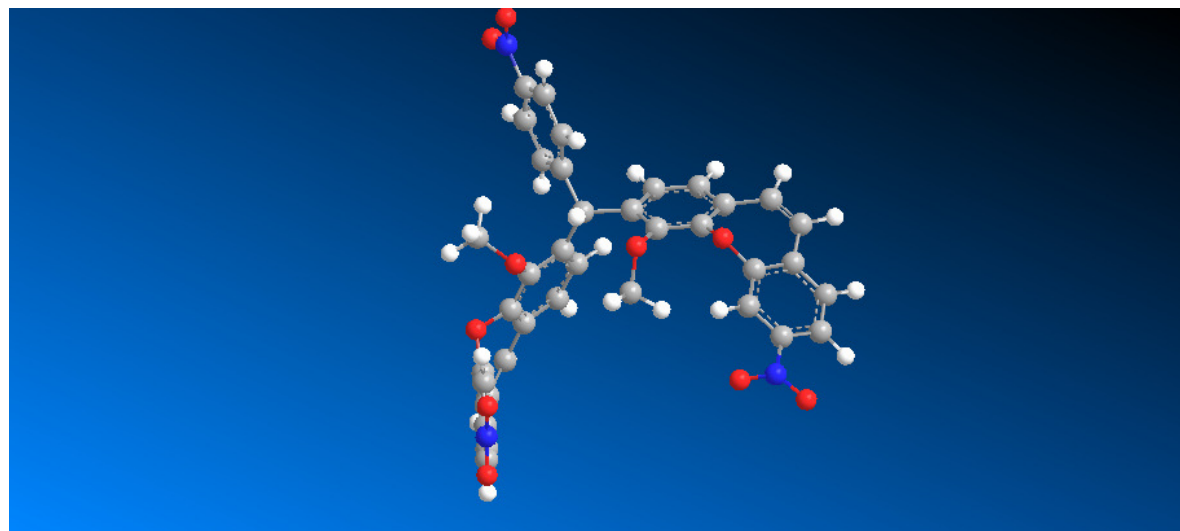

- The calculated coordinates of (**5c**) ( the part of calculated log file)

Standard orientation:

| Center<br>Number | Atomic<br>Number | Atomic<br>Type | Coordinates (Angstroms) |           |           |
|------------------|------------------|----------------|-------------------------|-----------|-----------|
|                  |                  |                | X                       | Y         | Z         |
| 1                | 6                | 0              | 8.109562                | -0.253596 | 0.593617  |
| 2                | 6                | 0              | 8.691121                | -1.255469 | -0.179466 |
| 3                | 6                | 0              | 7.947387                | -1.792539 | -1.222128 |

|    |   |   |           |           |           |
|----|---|---|-----------|-----------|-----------|
| 4  | 6 | 0 | 6.634640  | -1.367135 | -1.506505 |
| 5  | 6 | 0 | 6.085394  | -0.353497 | -0.689800 |
| 6  | 6 | 0 | 6.816419  | 0.207786  | 0.349150  |
| 7  | 6 | 0 | 5.927670  | -1.969694 | -2.631897 |
| 8  | 6 | 0 | 4.594684  | -2.038505 | -2.829555 |
| 9  | 6 | 0 | 3.524509  | -1.542019 | -1.967772 |
| 10 | 6 | 0 | 3.700244  | -0.511565 | -1.024729 |
| 11 | 8 | 0 | 4.864686  | 0.239803  | -0.964222 |
| 12 | 6 | 0 | 2.247598  | -2.115210 | -2.074067 |
| 13 | 6 | 0 | 1.184229  | -1.681922 | -1.288080 |
| 14 | 6 | 0 | 1.352970  | -0.655315 | -0.355959 |
| 15 | 6 | 0 | 2.636207  | -0.087321 | -0.215855 |
| 16 | 6 | 0 | 0.226002  | -0.129641 | 0.537780  |
| 17 | 6 | 0 | -0.201223 | 1.308240  | 0.208221  |
| 18 | 6 | 0 | -0.942028 | -1.111632 | 0.672543  |
| 19 | 6 | 0 | 0.148860  | 1.901493  | -1.015234 |
| 20 | 6 | 0 | -0.216982 | 3.197118  | -1.352642 |
| 21 | 6 | 0 | -0.977286 | 3.935560  | -0.447639 |
| 22 | 6 | 0 | -1.369471 | 3.400225  | 0.768395  |
| 23 | 6 | 0 | -0.964004 | 2.106052  | 1.086564  |
| 24 | 6 | 0 | -0.846129 | -2.112655 | 1.650975  |
| 25 | 6 | 0 | -1.841130 | -3.063454 | 1.823072  |
| 26 | 6 | 0 | -3.010244 | -3.035717 | 1.042565  |
| 27 | 6 | 0 | -3.109993 | -2.034817 | 0.064995  |
| 28 | 6 | 0 | -2.090995 | -1.088178 | -0.140421 |
| 29 | 6 | 0 | -4.072549 | -4.010770 | 1.287654  |
| 30 | 6 | 0 | -5.398728 | -3.857605 | 1.078326  |
| 31 | 6 | 0 | -6.073010 | -2.666646 | 0.569315  |
| 32 | 6 | 0 | -5.435555 | -1.733689 | -0.275153 |
| 33 | 8 | 0 | -4.186928 | -2.010504 | -0.811991 |
| 34 | 6 | 0 | -7.409691 | -2.408474 | 0.931065  |
| 35 | 6 | 0 | -8.076732 | -1.267606 | 0.503801  |
| 36 | 6 | 0 | -7.392705 | -0.363114 | -0.307701 |
| 37 | 6 | 0 | -6.073469 | -0.579287 | -0.703983 |
| 38 | 8 | 0 | 2.805135  | 0.961026  | 0.656449  |
| 39 | 6 | 0 | 3.414194  | 0.622227  | 1.909734  |
| 40 | 7 | 0 | 8.877740  | 0.348310  | 1.685364  |
| 41 | 8 | 0 | 10.009950 | -0.088636 | 1.902503  |

|    |   |   |           |           |           |
|----|---|---|-----------|-----------|-----------|
| 42 | 8 | 0 | 8.350340  | 1.256258  | 2.331688  |
| 43 | 8 | 0 | -2.252463 | -0.095967 | -1.074456 |
| 44 | 6 | 0 | -2.229842 | -0.477890 | -2.459119 |
| 45 | 7 | 0 | -8.080051 | 0.842672  | -0.774664 |
| 46 | 8 | 0 | -9.242326 | 1.023922  | -0.405241 |
| 47 | 8 | 0 | -7.459554 | 1.613018  | -1.510386 |
| 48 | 7 | 0 | -1.375540 | 5.308032  | -0.781340 |
| 49 | 8 | 0 | -2.039293 | 5.930899  | 0.047199  |
| 50 | 8 | 0 | -1.023415 | 5.754646  | -1.873506 |
| 51 | 7 | 0 | -1.392452 | 1.643961  | 2.421889  |
| 52 | 8 | 0 | -0.658222 | 0.876585  | 3.045834  |
| 53 | 8 | 0 | -2.455689 | 2.083096  | 2.855625  |
| 54 | 1 | 0 | 9.698655  | -1.590211 | 0.031885  |
| 55 | 1 | 0 | 8.388033  | -2.564962 | -1.845999 |
| 56 | 1 | 0 | 6.400580  | 1.016212  | 0.935507  |
| 57 | 1 | 0 | 6.565008  | -2.478026 | -3.351983 |
| 58 | 1 | 0 | 4.253731  | -2.597338 | -3.698669 |
| 59 | 1 | 0 | 2.092485  | -2.916032 | -2.791845 |
| 60 | 1 | 0 | 0.217644  | -2.161785 | -1.391730 |
| 61 | 1 | 0 | 0.648690  | -0.063244 | 1.541151  |
| 62 | 1 | 0 | 0.726268  | 1.322301  | -1.725451 |
| 63 | 1 | 0 | 0.075165  | 3.636047  | -2.298797 |
| 64 | 1 | 0 | -1.966057 | 3.976071  | 1.462477  |
| 65 | 1 | 0 | 0.034337  | -2.142816 | 2.286599  |
| 66 | 1 | 0 | -1.734599 | -3.826401 | 2.589210  |
| 67 | 1 | 0 | -3.749235 | -4.928007 | 1.775970  |
| 68 | 1 | 0 | -6.055933 | -4.658678 | 1.409533  |
| 69 | 1 | 0 | -7.926010 | -3.121213 | 1.567853  |
| 70 | 1 | 0 | -9.103759 | -1.072408 | 0.785083  |
| 71 | 1 | 0 | -5.560319 | 0.123615  | -1.346686 |
| 72 | 1 | 0 | 4.374772  | 0.118282  | 1.765755  |
| 73 | 1 | 0 | 3.569109  | 1.565299  | 2.437180  |
| 74 | 1 | 0 | 2.758046  | -0.024763 | 2.505950  |
| 75 | 1 | 0 | -2.417155 | 0.440005  | -3.019819 |
| 76 | 1 | 0 | -1.247304 | -0.876407 | -2.736408 |
| 77 | 1 | 0 | -3.007345 | -1.211987 | -2.681888 |

-----  
After PCM corrections, the SCF energy is -2545.63225077 a.u.

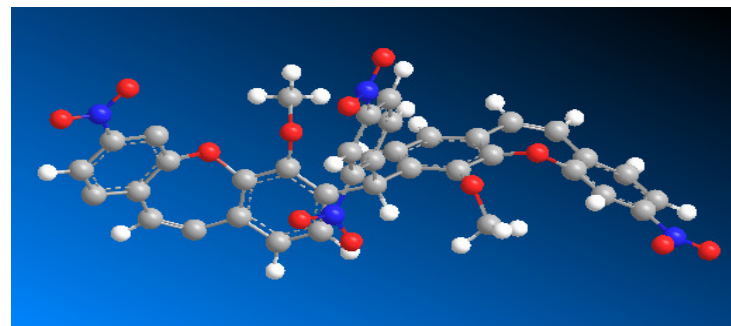

Visualization of calculated geometry of **(5c)**:

- The calculated coordinates of **(5d)** ( the part of calculated log file)

Standard orientation:

| Center<br>Number | Atomic<br>Number | Atomic<br>Type | Coordinates (Angstroms) |           |           |
|------------------|------------------|----------------|-------------------------|-----------|-----------|
|                  |                  |                | X                       | Y         | Z         |
| 1                | 6                | 0              | 6.205035                | -2.460147 | -1.033567 |
| 2                | 6                | 0              | 7.371274                | -1.723179 | -1.227011 |
| 3                | 6                | 0              | 7.472394                | -0.484109 | -0.608606 |
| 4                | 6                | 0              | 6.438070                | 0.046391  | 0.188483  |
| 5                | 6                | 0              | 5.270202                | -0.733982 | 0.348267  |
| 6                | 6                | 0              | 5.154014                | -1.981816 | -0.251292 |
| 7                | 6                | 0              | 6.633132                | 1.343627  | 0.825454  |
| 8                | 6                | 0              | 5.684727                | 2.199475  | 1.262385  |
| 9                | 6                | 0              | 4.233786                | 2.057657  | 1.195093  |
| 10               | 6                | 0              | 3.574676                | 0.824620  | 1.078718  |
| 11               | 8                | 0              | 4.257415                | -0.379497 | 1.220135  |
| 12               | 6                | 0              | 3.432852                | 3.211883  | 1.250247  |
| 13               | 6                | 0              | 2.051708                | 3.130316  | 1.197745  |
| 14               | 6                | 0              | 1.384317                | 1.902697  | 1.057292  |
| 15               | 6                | 0              | 2.171056                | 0.737914  | 0.984744  |
| 16               | 6                | 0              | -0.152954               | 1.965019  | 1.147773  |
| 17               | 6                | 0              | -0.829208               | 2.929062  | 0.155338  |
| 18               | 6                | 0              | -0.929671               | 0.665040  | 1.416370  |
| 19               | 6                | 0              | -1.897353               | 3.685251  | 0.669382  |
| 20               | 6                | 0              | -2.600024               | 4.613092  | -0.093872 |
| 21               | 6                | 0              | -2.234701               | 4.827148  | -1.421985 |
| 22               | 6                | 0              | -1.178489               | 4.100831  | -1.965607 |
| 23               | 6                | 0              | -0.495344               | 3.163288  | -1.187699 |
| 24               | 6                | 0              | -0.928784               | 0.195963  | 2.736492  |
| 25               | 6                | 0              | -1.639964               | -0.930211 | 3.121329  |
| 26               | 6                | 0              | -2.465257               | -1.598065 | 2.203341  |

|    |    |   |           |           |           |
|----|----|---|-----------|-----------|-----------|
| 27 | 6  | 0 | -2.500682 | -1.114577 | 0.884734  |
| 28 | 6  | 0 | -1.704435 | -0.033422 | 0.463646  |
| 29 | 6  | 0 | -3.268963 | -2.732488 | 2.655427  |
| 30 | 6  | 0 | -4.469252 | -3.141734 | 2.187838  |
| 31 | 6  | 0 | -5.247642 | -2.503811 | 1.132795  |
| 32 | 6  | 0 | -4.647878 | -1.752866 | 0.098420  |
| 33 | 8  | 0 | -3.271807 | -1.773704 | -0.072913 |
| 34 | 6  | 0 | -6.652907 | -2.605138 | 1.137455  |
| 35 | 6  | 0 | -7.436976 | -1.963707 | 0.188088  |
| 36 | 6  | 0 | -6.800601 | -1.203472 | -0.792707 |
| 37 | 6  | 0 | -5.411434 | -1.089226 | -0.851253 |
| 38 | 17 | 0 | 0.795436  | 2.281335  | -2.007391 |
| 39 | 8  | 0 | 1.599490  | -0.507579 | 0.913778  |
| 40 | 6  | 0 | 1.565362  | -1.079582 | -0.397207 |
| 41 | 7  | 0 | 6.078011  | -3.778947 | -1.653620 |
| 42 | 8  | 0 | 5.037192  | -4.411987 | -1.460429 |
| 43 | 8  | 0 | 7.016971  | -4.186474 | -2.341771 |
| 44 | 8  | 0 | -1.676200 | 0.415095  | -0.822768 |
| 45 | 6  | 0 | -1.699326 | -0.489699 | -1.933584 |
| 46 | 7  | 0 | -7.606484 | -0.517239 | -1.802185 |
| 47 | 8  | 0 | -8.833405 | -0.623394 | -1.732226 |
| 48 | 8  | 0 | -7.018045 | 0.133322  | -2.669375 |
| 49 | 1  | 0 | 8.171822  | -2.121161 | -1.837260 |
| 50 | 1  | 0 | 8.379456  | 0.100092  | -0.735131 |
| 51 | 1  | 0 | 4.273396  | -2.586606 | -0.082958 |
| 52 | 1  | 0 | 7.668363  | 1.671861  | 0.886202  |
| 53 | 1  | 0 | 6.028262  | 3.158131  | 1.646298  |
| 54 | 1  | 0 | 3.914344  | 4.180741  | 1.352337  |
| 55 | 1  | 0 | 1.463166  | 4.041097  | 1.267542  |
| 56 | 1  | 0 | -0.285096 | 2.495294  | 2.099107  |
| 57 | 1  | 0 | -2.180795 | 3.530525  | 1.707924  |
| 58 | 1  | 0 | -3.420429 | 5.169379  | 0.350257  |
| 59 | 1  | 0 | -2.761354 | 5.553507  | -2.034232 |
| 60 | 1  | 0 | -0.880910 | 4.246792  | -2.998798 |
| 61 | 1  | 0 | -0.330257 | 0.722390  | 3.475751  |
| 62 | 1  | 0 | -1.595831 | -1.279753 | 4.148955  |
| 63 | 1  | 0 | -2.877137 | -3.247260 | 3.530802  |
| 64 | 1  | 0 | -4.965998 | -3.955669 | 2.711292  |

|    |   |   |           |           |           |
|----|---|---|-----------|-----------|-----------|
| 65 | 1 | 0 | -7.131071 | -3.195339 | 1.914050  |
| 66 | 1 | 0 | -8.516763 | -2.040016 | 0.197885  |
| 67 | 1 | 0 | -4.941570 | -0.511561 | -1.635811 |
| 68 | 1 | 0 | 1.115184  | -2.068595 | -0.284283 |
| 69 | 1 | 0 | 0.960265  | -0.468134 | -1.072138 |
| 70 | 1 | 0 | 2.571444  | -1.184952 | -0.817455 |
| 71 | 1 | 0 | -1.123767 | 0.002537  | -2.720661 |
| 72 | 1 | 0 | -1.237114 | -1.447769 | -1.680994 |
| 73 | 1 | 0 | -2.718158 | -0.669452 | -2.282655 |

-----  
 After PCM corrections, the SCF energy is -2596.21338922 a.u.

Visualization of calculated geometry of (**5d**):

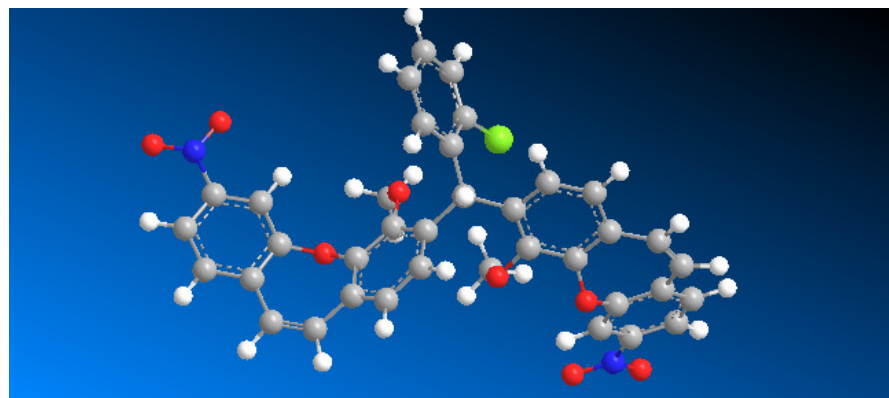

- The calculated coordinates of (**5e**) ( the part of calculated log file) -

Standard orientation:

| Center<br>Number | Atomic<br>Number | Atomic<br>Type | Coordinates (Angstroms) |           |           |
|------------------|------------------|----------------|-------------------------|-----------|-----------|
|                  |                  |                | X                       | Y         | Z         |
| 1                | 6                | 0              | 6.954919                | -1.848911 | 0.317117  |
| 2                | 6                | 0              | 7.324183                | -2.244434 | -0.967118 |
| 3                | 6                | 0              | 6.757490                | -1.580396 | -2.046977 |



|    |    |   |           |           |           |
|----|----|---|-----------|-----------|-----------|
| 4  | 6  | 0 | 5.823190  | -0.538879 | -1.880797 |
| 5  | 6  | 0 | 5.481290  | -0.172154 | -0.559431 |
| 6  | 6  | 0 | 6.040941  | -0.817693 | 0.535190  |
| 7  | 6  | 0 | 5.270921  | 0.115943  | -3.061769 |
| 8  | 6  | 0 | 4.093149  | 0.768979  | -3.161934 |
| 9  | 6  | 0 | 3.088019  | 0.980788  | -2.124380 |
| 10 | 6  | 0 | 3.381955  | 0.969677  | -0.751667 |
| 11 | 8  | 0 | 4.692562  | 0.932498  | -0.289877 |
| 12 | 6  | 0 | 1.751838  | 1.211099  | -2.498893 |
| 13 | 6  | 0 | 0.754597  | 1.415165  | -1.556404 |
| 14 | 6  | 0 | 1.039300  | 1.389724  | -0.185351 |
| 15 | 6  | 0 | 2.374566  | 1.161875  | 0.208770  |
| 16 | 6  | 0 | 0.012070  | 1.721402  | 0.900174  |
| 17 | 6  | 0 | -0.766621 | 3.014187  | 0.595888  |
| 18 | 6  | 0 | -0.860158 | 0.591660  | 1.477426  |
| 19 | 6  | 0 | -0.225390 | 4.205036  | 1.113100  |
| 20 | 6  | 0 | -0.814178 | 5.451819  | 0.927476  |
| 21 | 6  | 0 | -1.999736 | 5.525629  | 0.201279  |
| 22 | 6  | 0 | -2.577319 | 4.380585  | -0.336512 |
| 23 | 6  | 0 | -1.957031 | 3.145552  | -0.135735 |
| 24 | 6  | 0 | -1.351358 | 0.804559  | 2.777930  |
| 25 | 6  | 0 | -2.144429 | -0.125436 | 3.431627  |
| 26 | 6  | 0 | -2.508899 | -1.328433 | 2.801956  |
| 27 | 6  | 0 | -2.005522 | -1.553654 | 1.514020  |
| 28 | 6  | 0 | -1.189199 | -0.622967 | 0.847151  |
| 29 | 6  | 0 | -3.401673 | -2.267985 | 3.478138  |
| 30 | 6  | 0 | -4.275299 | -3.128884 | 2.909408  |
| 31 | 6  | 0 | -4.526769 | -3.299716 | 1.481488  |
| 32 | 6  | 0 | -3.548412 | -3.027325 | 0.501444  |
| 33 | 8  | 0 | -2.239963 | -2.766659 | 0.874843  |
| 34 | 6  | 0 | -5.789882 | -3.736548 | 1.036146  |
| 35 | 6  | 0 | -6.084831 | -3.866236 | -0.314581 |
| 36 | 6  | 0 | -5.093142 | -3.554177 | -1.244928 |
| 37 | 6  | 0 | -3.821862 | -3.133729 | -0.854512 |
| 38 | 35 | 0 | -2.817488 | 1.650669  | -0.962216 |
| 39 | 17 | 0 | -2.780300 | 7.079579  | -0.048083 |
| 40 | 7  | 0 | -5.384814 | -3.686253 | -2.672967 |
| 41 | 8  | 0 | -6.515790 | -4.053348 | -3.000420 |

|    |   |   |           |           |           |
|----|---|---|-----------|-----------|-----------|
| 42 | 8 | 0 | -4.485804 | -3.421966 | -3.474691 |
| 43 | 8 | 0 | 2.731980  | 1.239153  | 1.536504  |
| 44 | 6 | 0 | 2.744840  | -0.007483 | 2.241677  |
| 45 | 7 | 0 | 7.548021  | -2.521201 | 1.473429  |
| 46 | 8 | 0 | 8.347360  | -3.436222 | 1.262484  |
| 47 | 8 | 0 | 7.213877  | -2.141774 | 2.598470  |
| 48 | 8 | 0 | -0.801883 | -0.882694 | -0.441439 |
| 49 | 6 | 0 | 0.203730  | -1.891454 | -0.613621 |
| 50 | 1 | 0 | 8.040820  | -3.044339 | -1.103975 |
| 51 | 1 | 0 | 7.039251  | -1.868428 | -3.055934 |
| 52 | 1 | 0 | 5.797766  | -0.499827 | 1.540430  |
| 53 | 1 | 0 | 5.849719  | -0.016110 | -3.973356 |
| 54 | 1 | 0 | 3.807136  | 1.121518  | -4.151130 |
| 55 | 1 | 0 | 1.502200  | 1.230100  | -3.556594 |
| 56 | 1 | 0 | -0.263910 | 1.577877  | -1.885784 |
| 57 | 1 | 0 | 0.636390  | 2.000215  | 1.753198  |
| 58 | 1 | 0 | 0.699500  | 4.148979  | 1.681633  |
| 59 | 1 | 0 | -0.363529 | 6.345935  | 1.344753  |
| 60 | 1 | 0 | -3.496559 | 4.440670  | -0.906889 |
| 61 | 1 | 0 | -1.098175 | 1.732276  | 3.285038  |
| 62 | 1 | 0 | -2.506244 | 0.079023  | 4.435696  |
| 63 | 1 | 0 | -3.418330 | -2.187897 | 4.563609  |
| 64 | 1 | 0 | -4.936324 | -3.686390 | 3.569625  |
| 65 | 1 | 0 | -6.552926 | -3.969326 | 1.773695  |
| 66 | 1 | 0 | -7.058267 | -4.197659 | -0.653418 |
| 67 | 1 | 0 | -3.056271 | -2.910704 | -1.585849 |
| 68 | 1 | 0 | 3.140398  | 0.208237  | 3.236635  |
| 69 | 1 | 0 | 1.733278  | -0.421182 | 2.333098  |
| 70 | 1 | 0 | 3.390821  | -0.739258 | 1.743439  |
| 71 | 1 | 0 | 0.368990  | -1.963818 | -1.690244 |
| 72 | 1 | 0 | 1.139188  | -1.592908 | -0.126452 |
| 73 | 1 | 0 | -0.130653 | -2.856100 | -0.223246 |

-----  
After PCM corrections, the SCF energy is -5167.33306634 a.u.

Visualization of calculated geometry of (**5e**):

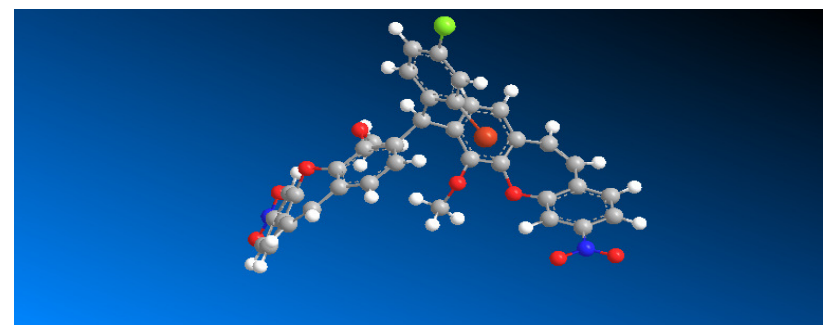

## 2. Experimental section

### EXPERIMENTAL SECTION

#### General information

All the spectra were recorded using a Varian VNMRs spectrometer operating at 11.7 T and Varian Mercury VX 9.4 T magnetic field. Measurements were performed for ca. 1.0 M solutions of all the compounds in DMSO-d<sub>6</sub> or CDCl<sub>3</sub>. The residual signals of DMSO-d<sub>6</sub> (2.54 ppm) and CDCl<sub>3</sub> (7.26 ppm) in <sup>1</sup>H NMR and of the DMSO-d<sub>6</sub> signal (40.4 ppm) and of CDCl<sub>3</sub> (77.0 ppm) in <sup>13</sup>C NMR spectra were used as the chemical shift references. Spin multiplicities are described as s (singlet), d(doublet), t (triplet), q (quartet), m (multiplet), dd (double doublet). Coupling constants are reported in Hertz. All the proton spectra were recorded using the standard spectrometer software and parameters set: acquisition time 3s, pulse angle 30°. The standard measurement parameter set for <sup>13</sup>C NMR spectra was: pulse width 7 µs (the 90° pulse width was 12.5 µs), acquisition time 1 s, spectral width 200 ppm, 1000 scans of 32 K data point were accumulated and after zero-filling to 64 K; and the FID signals were subjected to Fourier transformation after applying a 1 Hz line broadening. The <sup>1</sup>H-<sup>13</sup>Cgs-HSQC and <sup>1</sup>H-<sup>13</sup>Cgs-HMBC spectra were also recorded using the standard Varian software.

The dibenzo [*b, f*] oxepines (**3a-3f**) were obtained using the procedure described by us in Tetrahedron (H. Krawczyk, M. Wrzesiński, D. Mielecki, P. Szczeciński, E. Grzesiuk), Synthesis of derivatives of methoxydibenzo[*b, f*]oxepine in the presence of sodium azide. Tetrahedron 2016, 72, 3877-3884. The compounds (**1a-1h**) were obtained in standard reduction of nitro group with zinc in acetic acid.

#### General procedure of synthesis of compounds (2a-2h) (Scheme 1 in the text):

To a solution of appropriate aminodibenzo[*b, f*]oxepine (1 mmol) dissolved in dichloromethane (15 mL) DBU was added (2 mmol). The resulting solution was stirred for 5 min at room temperature and next cooled down to a -78°C by acetone/dry ice bath. Afterward, the NBS (2 mmol) was added as a solid to the reaction mixture. The solution turned dark red and was stirred for 10 min at -78°C before quenching by addition of saturated bicarbonate solution. The mixture was transferred to a separation funnel and the organic layer was separated, washed with 50 mL of water and 50 mL of 1M HCl, dried over anhydrous sodium sulfate, and concentrated to dryness in a *vacuum*. The residue was subjected to column chromatography on silica gel using DCM as a mobile phase.

#### Characterisation Data of (2a-2h)

**2a.** yield 45%; time of reaction 15 min; dark orange/red powder mp = 193°C; <sup>1</sup>H NMR (500 MHz, CDCl<sub>3</sub>, 298 K): δ (ppm): 7.88 (2H, d, J<sub>H<sub>2</sub>,H<sub>4</sub></sub> = 2 Hz, H<sub>4</sub>), 7.71 (2H, dd, J<sub>H<sub>1</sub>,H<sub>2</sub></sub> = 8.5 Hz, H<sub>2</sub>), 7.30 (2H, d, H<sub>1</sub>), 7.07 (2H, t, J<sub>H<sub>8</sub>,H<sub>7</sub>,9</sub> = 8.5 Hz, H<sub>8</sub>), 6.96 (2H, dd, J<sub>H<sub>7</sub>,H<sub>9</sub></sub> = 1.5 Hz, H<sub>7</sub>), 6.82 (2H, AB spin system, d, J<sub>H<sub>10</sub>,H<sub>11</sub></sub> = 11.5 Hz, H<sub>10</sub>), 6.79 (2H, dd, H<sub>9</sub>), 6.79 (2H, AB spin system, d, H<sub>11</sub>), 3.98 (6H, s, OCH<sub>3</sub>). <sup>13</sup>C NMR (125 MHz, CDCl<sub>3</sub>, 298 K): δ (ppm): 157.74, 153.84, 151.91, 145.06, 133.61, 131.62, 131.36, 129.55, 129.34, 124.97, 120.78, 119.93, 116.24, 112.85, 56.31. HRMS (ESI): m/z calculated for C<sub>30</sub>H<sub>23</sub>N<sub>2</sub>O<sub>4</sub>+H 475.16523, found: 475.16524.

**2b.** yield 27%; time of reaction 15 min; orange powder mp = 250°C; <sup>1</sup>H NMR (500 MHz, CDCl<sub>3</sub>, 298 K): 7.72 (2H, dd, J<sub>H<sub>8</sub>,H<sub>9</sub></sub> = 8 Hz, J<sub>H<sub>6</sub>,H<sub>8</sub></sub> = 2 Hz, H<sub>8</sub>), 7.71 (2H, d, H<sub>6</sub>), 7.27 (2H, d, H<sub>9</sub>), 7.08 (2H, d, J<sub>H<sub>1</sub>,H<sub>2</sub></sub> = 8.5 Hz, H<sub>1</sub>), 6.80 (2H, d, J<sub>H<sub>2</sub>,H<sub>4</sub></sub> = 2.5 Hz, H<sub>4</sub>), 6.71 (2H, AB spin system, d, J<sub>H<sub>10</sub>,H<sub>11</sub></sub> = 11.5 Hz, H<sub>11</sub>), 6.70 (2H, dd, H<sub>2</sub>), 6.61 (2H, AB spin system, d, H<sub>11</sub>), 3.84 (6H, s, OCH<sub>3</sub>). <sup>13</sup>C NMR (125 MHz, CDCl<sub>3</sub>, 298 K): δ (ppm): 161.89, 158.02, 157.28, 153.61, 133.80, 131.31, 130.23, 129.55, 127.04, 123.11, 121.19, 114.58, 111.26, 106.99, 55.57. HRMS (ESI): *m/z* calculated for C<sub>30</sub>H<sub>23</sub>N<sub>2</sub>O<sub>4</sub>+H 475.16523, found: 475.16498.

**2c.** yield 35%; time of reaction 15 min; orange powder mp = 251.5°C; <sup>1</sup>H NMR (500 MHz, CDCl<sub>3</sub>, 298 K): δ(ppm): 7.72 (2H, dd, J<sub>H<sub>6</sub>,H<sub>8</sub></sub> = 2 Hz, J<sub>H<sub>8</sub>,H<sub>9</sub></sub> = 8.5 Hz, H<sub>8</sub>), 7.72 (2H, d, H<sub>6</sub>), 7.30 (2H, d, H<sub>9</sub>), 7.17 (2H, d, J<sub>H<sub>3</sub>,H<sub>4</sub></sub> = 9 Hz, H<sub>4</sub>), 6.85 (2H, dd, J<sub>H<sub>1</sub>,H<sub>3</sub></sub> = 3 Hz, H<sub>3</sub>), 6.77 (2H, AB spin system, d, J<sub>H<sub>10</sub>,H<sub>11</sub></sub> = 11.5 Hz, H<sub>11</sub>), 6.74 (2H, AB spin system, d, H<sub>10</sub>), 6.70 (2H, d, H<sub>1</sub>), 3.78 (6H, s, OCH<sub>3</sub>). <sup>13</sup>C NMR (125 MHz, CDCl<sub>3</sub>, 298 K): δ(ppm): 158.16, 156.69, 153.83, 147.06, 133.34, 131.36, 130.93, 129.82, 129.75, 123.96, 120.93, 119.09, 115.41, 114.06, 55.68. HRMS (ESI): *m/z* calculated for C<sub>30</sub>H<sub>23</sub>N<sub>2</sub>O<sub>4</sub>+H 475.16523, found: 475.16523.

**2d.** yield 37%; time of reaction 15 min; orange powder, decomposition above 258°C; <sup>1</sup>H NMR (500 MHz, CDCl<sub>3</sub>, 298 K): δ(ppm): 7.97 (2H, d, J<sub>H<sub>6</sub>,H<sub>8</sub></sub> = 2 Hz, H<sub>6</sub>), 7.73 (2H, dd, J<sub>H<sub>8</sub>,H<sub>9</sub></sub> = 8.5 Hz, H<sub>8</sub>), 7.50 (2H, d, H<sub>9</sub>), 6.64 (2H, t, J<sub>H<sub>3</sub>,H<sub>2,4</sub></sub> = 8.5 Hz, H<sub>3</sub>), 6.21 (2H, AB spin system, d, J<sub>H<sub>10</sub>,H<sub>11</sub></sub> = 11.5 Hz, H<sub>11</sub>), 6.17 (2H, AB spin system, d, H<sub>10</sub>), 5.76 (2H, d, H<sub>2</sub>), 5.65 (2H, d, H<sub>4</sub>), 3.93 (6H, s, OCH<sub>3</sub>). <sup>13</sup>C NMR (125 MHz, CDCl<sub>3</sub>, 298 K): δ(ppm): 157.44, 157.14, 154.31, 153.74, 134.20, 134.03, 129.69, 129.47, 127.50, 118.63, 118.51, 117.36, 107.72, 107.11, 56.58. HRMS (ESI): *m/z* calculated for C<sub>30</sub>H<sub>23</sub>N<sub>2</sub>O<sub>4</sub>+H 475.16523, found: 475.16523.

**2e.** yield 15 %; time of reaction 15 min; dark orange/red powder mp = 254°C; <sup>1</sup>H NMR (500 MHz, CDCl<sub>3</sub>, 298 K): δ(ppm): 7.73 (2H, d, J<sub>H<sub>6</sub>,H<sub>8</sub></sub> = 2 Hz, H<sub>6</sub>), 7.71 (2H, dd, J<sub>H<sub>8</sub>,H<sub>9</sub></sub> = 8 Hz, H<sub>8</sub>), 7.28 (1H, d, H<sub>9</sub>), 6.81 (2H, s, H<sub>4</sub>), 6.70 (2H, AB spin system, d, J<sub>H<sub>10</sub>,H<sub>11</sub></sub> = 11.5 Hz, H<sub>11</sub>), 6.67 (2H, AB spin system, d, H<sub>10</sub>), 6.64 (2H, s, H<sub>1</sub>), 3.92 (6H, s, OCH<sub>3</sub>), 3.86 (6H, s, OCH<sub>3</sub>). <sup>13</sup>C NMR (125 MHz, CDCl<sub>3</sub>, 298 K): δ(ppm): 157.64, 153.70, 150.75, 150.64, 146.16, 133.73, 131.31, 129.58, 127.83, 121.97, 121.21, 114.25, 111.27, 105.37, 56.29, 56.14. HRMS (ESI): *m/z* calculated for C<sub>32</sub>H<sub>27</sub>N<sub>2</sub>O<sub>6</sub>+H 535.18636, found: 535.18601.

**2f.** yield 10 %; time of reaction 15 min; orange powder decomposition above 255°C; <sup>1</sup>H NMR (500 MHz, CDCl<sub>3</sub>, 298 K): δ (ppm): 7.74 (2H, m, H<sub>4</sub>), 7.71 (2H, dd, J<sub>H<sub>1</sub>,H<sub>2</sub></sub> = 8.5 Hz, J<sub>H<sub>2</sub>,H<sub>4</sub></sub> = 2.5 Hz, H<sub>2</sub>), 7.32 (2H, ddd, J<sub>H<sub>6</sub>,H<sub>7</sub></sub> = 8 Hz, J<sub>H<sub>7</sub>,H<sub>8</sub></sub> = 7.5 Hz, J<sub>H<sub>7</sub>,H<sub>9</sub></sub> = 2 Hz, H<sub>7</sub>), 7.30 (2H, d, H<sub>1</sub>), 7.24 (2H, dd, J<sub>H<sub>6</sub>,H<sub>8</sub></sub> = 1.5 Hz, H<sub>6</sub>), 7.19 (2H, dd, J<sub>H<sub>8</sub>,H<sub>9</sub></sub> = 7.5 Hz, H<sub>9</sub>), 7.14 (2H, ddd, H<sub>8</sub>), 6.79 (2H, AB spin system, d, J<sub>H<sub>10</sub>,H<sub>11</sub></sub> = 11.5 Hz, H<sub>10</sub>), 6.74 (2H, AB spin system, d, H<sub>11</sub>). <sup>13</sup>C NMR (125 MHz, CDCl<sub>3</sub>, 298 K): δ (ppm): 158.09, 157.20, 154.04, 133.70, 131.78, 130.58, 130.53, 129.91, 129.70, 129.57, 125.36, 121.77, 121.29, 114.89. HRMS (ESI): *m/z* calculated for C<sub>28</sub>H<sub>19</sub>N<sub>2</sub>O<sub>2</sub>+H 415.14410, found: 415.04201.

**2g.** yield 25 %; time of reaction 15 min; yellow powder mp = 251.5°C; <sup>1</sup>H NMR (500 MHz, CDCl<sub>3</sub>, 298 K): 7.73 (2H, dd, J<sub>H<sub>1</sub>,H<sub>2</sub></sub> = 8 Hz, J<sub>H<sub>2</sub>,H<sub>4</sub></sub> = 2 Hz, H<sub>2</sub>), 7.69 (2H, d, H<sub>4</sub>), 7.29 (2H, d, H<sub>1</sub>), 7.17 (2H, d, J<sub>H<sub>8</sub>,H<sub>9</sub></sub> = 8.5 Hz, H<sub>9</sub>), 7.03 (2H, d, J<sub>H<sub>6</sub>,H<sub>8</sub></sub> = 2 Hz, H<sub>6</sub>), 6.91 (1H, dd, H<sub>8</sub>), 6.75 (2H, AB spin system, d, J<sub>H<sub>10</sub>,H<sub>11</sub></sub> = 11.5 Hz, H<sub>10</sub>), 6.72 (2H, AB spin system, d, H<sub>11</sub>), 2.30 (6H, s, CH<sub>3</sub>). <sup>13</sup>C NMR (125 MHz, DMSO-d<sub>6</sub>, 298 K): δ (ppm): 168.99,

157.44, 157.29, 153.79, 152.18, 133.29, 130.68, 129.75, 129.70, 129.16, 128.17, 121.51, 118.41, 115.24, 114.50, 21.11. HRMS (ESI):  $m/z$  calculated for  $C_{32}H_{23}N_2O_6+H$  531.15506, found: 531.15505.

**2h.** yield 23 %; time of reaction 15 min; orange powder mp = 248°C;  $^1H$  NMR (500 MHz,  $CDCl_3$ ):  $\delta$ (ppm): 8.32 (2H, d,  $J_{H1,H2} = 3$  Hz,  $H_1$ ), 8.28 (2H, dd,  $J_{H3,H4} = 9$  Hz,  $H_3$ ), 8.23 (2H, d,  $J_{H6,H8} = 2.5$  Hz,  $H_6$ ), 8.09 (2H, dd,  $J_{H8,H9} = 8.5$  Hz,  $H_8$ ), 7.67 (2H, d,  $H_4$ ), 7.62 (2H, d,  $H_9$ ), 7.16 (2H, AB spin system, d,  $J_{H10,H11} = 11.5$  Hz,  $H_{11}$ ), 7.08 (2H, AB spin system, d,  $H_{10}$ ).  $^{13}C$  NMR (125 MHz,  $CDCl_3$ ):  $\delta$ (ppm): 160.43, 155.24, 148.60, 145.08, 136.35, 131.67, 130.67, 130.62, 130.24, 126.22, 125.28, 123.04, 121.06, 117.00. HRMS (ESI):  $m/z$  calculated for  $C_{28}H_{16}N_4O_6+H$  505.11426, found: 531.11426.

#### General procedure of synthesis of compounds (4a-4e) (Scheme 2 in the text):

To a solution of appropriate methoxy derivative of nitrodibenzo[*b,f*]oxepine (1 mmol) dissolved in dichloromethane (15 mL) paraformaldehyde (1 mmol) was added. Afterward, the catalyst -  $BF_3 \cdot Et_2O$  (0.3 mL) was added carefully to a reaction mixture. The resulting solution turned orange and was stirred for 7 hours at room temperature. Afterward, the reaction mixture was quenched by the addition of methanol (10 mL). The mixture was transferred to a separation funnel filled with 20 mL of water or was filtered under reduced pressure if a precipitate has formed. The water layer was washed twice with 20 mL of dichloromethane. Organic layers were dried over anhydrous magnesium sulfate and concentrated to dryness in vacuo. The residue was subjected to column chromatography on silica gel using DCM as a mobile phase.

#### Characterisation Data of (4a-4e)

**4a.** Characterization and spectra can be found in P. Tobiasz, M. Poterała, E. Jaśkowska, H. Krawczyk, *RSC Adv.*, 2018, 8, 30678-30682.

**4b.** a mixture of 5 products; time of reaction 3h.

**4c4.** yield 54 %; time of reaction 2h; dark yellow/orange powder decomposition above 295°C;  $^1H$  NMR (500 MHz,  $CDCl_3$ ):  $\delta$ (ppm): rings A: 8.08 (1H, d,  $J_{H6,H8} = 2.5$  Hz,  $H_6$ ), 8.01 (1H, dd,  $J_{H8,H9} = 8.5$  Hz,  $H_8$ ), 7.27 (1H, d,  $H_9$ ), 7.24 (1H, d,  $J_{H3,H4} = 8.5$  Hz,  $H_4$ ), 6.99 (1H, d,  $H_3$ ), 6.92 (1H, AB spin system, d,  $J_{H10,H11} = 11.5$  Hz,  $H_{11}$ ), 6.72 (1H, AB spin system, d,  $H_{10}$ ), 3.79 (3H, s,  $OCH_3$ ), rings B: 7.95 (1H, dd,  $J_{H6,H8} = 2.5$  Hz,  $J_{H8,H9} = 8.5$  Hz,  $H_8$ ), 7.93 (1H, d,  $H_6$ ), 7.26 (1H, d,  $H_9$ ), 6.93 (1H, s,  $H_4$ ), 6.84 (1H, AB spin system, d,  $J_{H10,H11} = 11.5$  Hz,  $H_{11}$ ), 6.70 (1H, AB spin system, d,  $H_{10}$ ), 3.84 (3H, s,  $OCH_3$ ), rings C: 7.93 (1H, dd,  $J_{H6,H8} = 2$  Hz,  $J_{H8,H9} = 8.5$  Hz,  $H_8$ ), 7.80 (1H, d,  $H_6$ ), 7.24 (1H, d,  $H_9$ ), 6.81 (1H, AB spin system, d,  $J_{H10,H11} = 11.5$  Hz,  $H_{11}$ ), 6.67 (1H, AB spin system, d,  $H_{10}$ ), 6.64 (1H, s,  $H_1$ ), 6.51 (1H, s,  $H_4$ ), 3.89 (3H, s,  $OCH_3$ ), 4.02 (4H, s,  $CH_2$ ).  $^{13}C$  NMR (125 MHz,  $CDCl_3$ ):  $\delta$ (ppm): 157.91, 157.22, 157.17, 155.44, 154.86, 154.84, 154.45, 151.85, 150.30, 150.07, 148.45, 148.39, 137.38, 137.34, 137.26, 133.66, 133.58, 131.55, 131.50, 131.27, 129.78, 129.47, 129.42, 129.25, 128.47, 128.07, 127.89, 127.62, 126.01, 123.08, 122.05, 121.40, 120.13, 120.04, 119.89, 116.86, 116.71, 115.92, 114.21, 112.64, 110.68, 110.20, 56.15, 55.87, 55.85, 25.55, 25.55. HRMS (ESI):  $m/z$  calculated for  $C_{47}H_{32}N_3O_{12}$  830.19859, found: 830.19805.

**4d.** yield 65 %; time of reaction 2,5 h; light yellow powder mp = 236.5 °C; <sup>1</sup>H NMR (500 MHz, CDCl<sub>3</sub>, 298 K): δ (ppm): 7.93 (2H, dd, J<sub>H8,H9</sub> = 8.5 Hz, J<sub>H6,H8</sub> = 2 Hz, H<sub>8</sub>), 7.72 (2H, d, H<sub>6</sub>), 7.27 (2H, AB spin system, d, J<sub>H10,H11</sub> = 11.5 Hz, H<sub>11</sub>), 7.27 (2H, d, H<sub>9</sub>), 7.03 (2H, d, J<sub>H3,H4</sub> = 8.5 Hz, H<sub>3</sub>), 6.76 (2H, AB spin system, d, H<sub>10</sub>), 6.59 (2H, d, H<sub>4</sub>), 4.45 (2H, s, CH<sub>2</sub>), 3.81 (6H, s, OCH<sub>3</sub>). <sup>13</sup>C NMR (125 MHz, CDCl<sub>3</sub>, 298 K): δ (ppm): 156.72 (C5'), 156.38 (C1), 156.20 (C4'), 148.05 (C7), 138.45 (C9'), 132.06 (C3), 129.14 (C11), 129.14 (C9), 127.08 (C10), 124.61 (C2), 120.07 (C8), 119.42 (C11'), 117.34 (C6), 107.29 (C4), 55.97 (OCH<sub>3</sub>), 29.69 (CH<sub>2</sub>). HRMS (ESI): *m/z* calculated for C<sub>31</sub>H<sub>22</sub>N<sub>2</sub>O<sub>8</sub> 550.13761, found: 550.13707.

**4e.** mixture of Prins reaction products, yield 30 % raw; time of reaction 3,5 h.

#### General procedure of synthesis of compounds (5a-5f) (Table 2 in the text):

To a solution of 6-methoxy-3-nitrodibenzo[*b,f*]oxepine (1 mmol) dissolved in dichloromethane (C<sub>max</sub>) a proper aldehyde (0.5 mmol) was added. Afterward, the catalyst - BF<sub>3</sub>·Et<sub>2</sub>O (0.3 mL) was added carefully to a reaction mixture. The resulting solution turned brown and was stirred for 3 weeks at room temperature. Afterward, the reaction mixture was quenched by the addition of methanol (10 mL). The mixture was transferred to a separation funnel filled with 20 mL of water. The water layer was washed twice with 20 mL of dichloromethane. Organic layers were dried over anhydrous magnesium sulfate and concentrated to dryness in vacuo. The residue was subjected to column chromatography on silica gel using ethyl acetate/hexane 1:1 as a mobile phase.

#### Characterisation Data of (5a-5f)

**5a.** yield 26 %; time of reaction 3 weeks; light yellow powder mp = 167 °C; <sup>1</sup>H NMR (500 MHz, CDCl<sub>3</sub>, 298 K): δ (ppm): 8.19 (2H, d, J<sub>H6,H8</sub> = 2.5 Hz, H<sub>6</sub>), 8.00 (1H, dd, J<sub>H14,H15</sub> = 8.5 Hz, J<sub>H14,H16</sub> = 2 Hz, H<sub>14</sub>), 8.00 (2H, d, J<sub>H8,H9</sub> = 8.5 Hz, H<sub>8</sub>), 7.34-7.32 (1H, m, H<sub>16</sub>), 7.30 (2H, d, H<sub>9</sub>), 7.11 (2H, d, J<sub>H1,H2</sub> = 8.5 Hz, H<sub>1</sub>), 7.03 (2H, AB spin system, d, J<sub>H10,H11</sub> = 11.5 Hz, H<sub>11</sub>), 6.93-6.83 (2H, m, H<sub>15</sub>, H<sub>17</sub>), 6.82 (2H, AB spin system, d, H<sub>10</sub>), 6.67 (2H, d, H<sub>2</sub>), 6.66 (1H, s, CH), 3.94 (6H, s, OCH<sub>3</sub>). <sup>13</sup>C NMR of compound (5a): (125 MHz, CDCl<sub>3</sub>, 298 K): δ (ppm): 157.53 (C5'), 151.51 (C4), 148.56 (C13), 147.18 (C7), 146.10 (C4'), 145.21 (C12), 137.36 (C9'), 135.40 (C16), 133.20 (C17), 130.31 (C10), 129.98 (C11), 128.84 (C3), 128.66 (C11'), 128.52 (C9), 126.56 (C15), 124.21 (C2), 120.11 (C14), 120.05 (C8), 117.45 (C6), 112.81 (C1), 56.14 (OCH<sub>3</sub>), 40.78 (CH). HRMS (ESI): *m/z* calculated for C<sub>37</sub>H<sub>25</sub>N<sub>3</sub>O<sub>10</sub>+H 672.16127, found: 672.16127.

**5b.** yield 36 %; time of reaction 2 weeks; yellow powder mp = 145 °C; <sup>1</sup>H NMR (500 MHz, CDCl<sub>3</sub>, 298 K): δ (ppm): 8.19 (2H, d, J<sub>H6,H8</sub> = 2.5 Hz, H<sub>6</sub>), 8.12 (2H, d, J<sub>H13,H14</sub> = 8.5 Hz, H<sub>14</sub>), 8.01 (2H, dd, J<sub>H8,H9</sub> = 8.5 Hz, H<sub>8</sub>), 7.30 (2H, d, H<sub>9</sub>), 7.13 (2H, d, H<sub>13</sub>), 6.87 (2H, d, J<sub>H1,H2</sub> = 8.5 Hz, H<sub>1</sub>), 6.79 (2H, AB spin system, d, J<sub>H10,H11</sub> = 11.5 Hz, H<sub>11</sub>), 6.75 (2H, AB spin system, d, H<sub>10</sub>), 6.45 (2H, d, H<sub>2</sub>), 5.79 (1H, s, CH), 3.94 (6H, s, OCH<sub>3</sub>). <sup>13</sup>C NMR (125 MHz, CDCl<sub>3</sub>, 298 K): δ (ppm): 157.46 (C5'), 151.00 (C4), 150.00 (C12), 148.68 (C7), 146.88 (C15), 146.20 (C4'), 137.06 (C9'), 131.32 (C3), 130.38 (C13), 129.72 (C11), 129.36 (C10), 129.12 (C11'), 129.03 (C9), 127.00 (C2), 123.80 (C14), 120.18 (C8), 117.49 (C6), 112.52 (C1), 56.14 (OCH<sub>3</sub>), 49.27 (CH). HRMS (ESI): *m/z* calculated for C<sub>37</sub>H<sub>25</sub>N<sub>3</sub>O<sub>10</sub> 671.15399, found: 671.15345.

**5c.** yield 66%; time of reaction 2 weeks; light yellow powder mp = 185.5 °C; <sup>1</sup>H NMR (500 MHz, CDCl<sub>3</sub>, 298 K): δ (ppm): 8.77 (1H, d, J<sub>H14,H16</sub> = 2.5 Hz, H<sub>14</sub>), 8.24 (1H, dd, J<sub>H16,H17</sub> = 8.5 Hz, H<sub>16</sub>), 8.18 (2H, d, J<sub>H6,H8</sub> = 2.5 Hz, H<sub>6</sub>), 8.01 (2H, dd, J<sub>H8,H9</sub> = 8.5 Hz, H<sub>8</sub>), 7.31 (2H, d, H<sub>9</sub>), 7.11 (1H, d, H<sub>17</sub>), 6.84 (2H, d, J<sub>H1,H2</sub> = 8.5 Hz, H<sub>1</sub>), 6.82 (2H, AB spin system, d, J<sub>H10,H11</sub> = 11.5 Hz, H<sub>11</sub>), 6.79 (2H, AB spin system, d, H<sub>10</sub>), 6.66 (1H, s, CH), 6.36 (2H, d, H<sub>2</sub>), 3.94 (6H, s, OCH<sub>3</sub>). <sup>13</sup>C NMR (125 MHz, CDCl<sub>3</sub>, 298 K): δ (ppm): 157.47 (C5'), 151.44 (C4), 148.91 (C13), 148.74 (C7), 146.87

(C15), 146.36 (C4'), 144.12 (C12), 136.86 (C9'), 133.24 (C17), 129.87 (C10), 129.49 (C3), 129.40 (C11'), 129.19 (C9), 129.04 (C11), 126.69 (C16), 126.51 (C2), 120.75 (C14), 120.26 (C8), 117.47 (C6), 112.51 (C1), 56.14 (OCH<sub>3</sub>), 44.42 (CH). HRMS (ESI):  $m/z$  calculated for C<sub>37</sub>H<sub>23</sub>N<sub>4</sub>O<sub>12</sub> 715.13124, found: 715.13070.

**5d.** yield 9%; time of reaction 3 weeks; light yellow powder mp = 141 °C; <sup>1</sup>H NMR (500 MHz, CDCl<sub>3</sub>, 298 K): δ (ppm): 8.19 (2H, d, J<sub>H6,H8</sub> = 2.5 Hz, H<sub>6</sub>), 7.99 (2H, dd, J<sub>H8,H9</sub> = 8.5 Hz, H<sub>8</sub>), 7.53 (1H, dd, J<sub>H15,H17</sub> = 2 Hz, J<sub>H16,H17</sub> = 8.5 Hz, H<sub>17</sub>), 7.28 (2H, d, H<sub>9</sub>), 7.23-7.19 (1H, m, H<sub>16</sub>), 6.92 (1H, ddd, J<sub>H14,H15</sub> = 8.5 Hz, J<sub>H15,H16</sub> = 8.5 Hz, H<sub>15</sub>), 6.83 (2H, d, J<sub>H1,H2</sub> = 8.5 Hz, H<sub>1</sub>), 6.81 (2H, AB spin system, d, J<sub>H10,H11</sub> = 11.5 Hz, H<sub>11</sub>), 6.73 (2H, AB spin system, d, H<sub>10</sub>), 6.46 (1H, dd, J<sub>H14,H16</sub> = 1.5 Hz, H<sub>14</sub>), 6.45 (2H, d, H<sub>2</sub>), 6.00 (1H, s, CH), 3.93 (6H, s, OCH<sub>3</sub>). <sup>13</sup>C NMR (125 MHz, CDCl<sub>3</sub>, 298 K): δ (ppm): 157.46, 150.69, 148.54, 146.06, 140.01, 137.32, 131.66, 131.34, 130.10, 129.41, 128.99, 128.84, 128.35, 126.64, 126.30, 125.08, 120.07, 119.06, 117.46, 112.30, 56.06, 46.49. HRMS (ESI):  $m/z$  calculated for C<sub>37</sub>H<sub>25</sub>ClN<sub>2</sub>O<sub>8</sub>+H 661.13721, found: 661.13722.

**5e.** yield 14%; time of reaction 3 weeks; light yellow powder mp = 133.5 °C; <sup>1</sup>H NMR (500 MHz, CDCl<sub>3</sub>, 298 K): δ (ppm): 8.19 (2H, d, J<sub>H6,H8</sub> = 2.5 Hz, H<sub>6</sub>), 8.00 (2H, dd, J<sub>H8,H9</sub> = 8.5 Hz, H<sub>8</sub>), 7.60 (1H, d, J<sub>H14,H16</sub> = 2 Hz, H<sub>14</sub>), 7.29 (2H, d, H<sub>9</sub>), 7.14 (1H, dd, J<sub>H16,H17</sub> = 8.5 Hz, H<sub>16</sub>), 6.84 (2H, d, J<sub>H1,H2</sub> = 8.5 Hz, H<sub>1</sub>), 6.78 (2H, AB spin system, d, J<sub>H10,H11</sub> = 11.5 Hz, H<sub>11</sub>), 6.75 (2H, AB spin system, d, H<sub>10</sub>), 6.65 (1H, d, H<sub>17</sub>), 6.42 (2H, d, H<sub>2</sub>), 5.91 (1H, s, CH), 3.93 (6H, s, OCH<sub>3</sub>). <sup>13</sup>C NMR (125 MHz, CDCl<sub>3</sub>, 298 K): δ (ppm): 157.47 (C5'), 150.85 (C4), 148.59 (C7), 146.10 (C4'), 140.44 (C12), 137.19 (C9'), 133.56 (C15), 132.85 (C14), 132.16 (C17), 131.15 (C11'), 129.85 (C11), 129.26 (C3), 129.05 (C9), 129.03 (C10), 127.69 (C16), 126.61 (C2), 125.30 (C13), 120.11 (C8), 117.47 (C6), 112.35 (C1), 56.07 (OCH<sub>3</sub>), 48.75 (CH). HRMS (ESI):  $m/z$  calculated for C<sub>37</sub>H<sub>24</sub>BrClN<sub>2</sub>O<sub>8</sub>+H 739.04773, found: 739.04773.

**5f.** yield 43%; time of reaction 3 weeks; light yellow powder mp = 266 °C; <sup>1</sup>H NMR (500 MHz, CDCl<sub>3</sub>, 298 K): δ (ppm): 8.20 (1H, d, J<sub>H6,H8</sub> = 2.5 Hz, H<sub>6</sub>), 8.18 (1H, d, J<sub>H18,H20</sub> = 2.5 Hz, H<sub>18</sub>), 8.01 (1H, dd, J<sub>H8,H9</sub> = 8.5 Hz, H<sub>8</sub>), 7.85 (1H, dd, J<sub>H20,H21</sub> = 8.5 Hz, H<sub>20</sub>), 7.33 (d, 1H, H<sub>9</sub>), 7.11 (1H, d, H<sub>21</sub>), 7.09 (1H, AB spin system, d, J<sub>H10,H11</sub> = 11.5 Hz, H<sub>11</sub>), 6.91 (1H, t, J<sub>H14,H13,15</sub> = 8 Hz, H<sub>14</sub>), 6.91 (1H, d, J<sub>H1,H2</sub> = 8.5 Hz, H<sub>1</sub>), 6.87 (1H, AB spin system, d, H<sub>10</sub>), 6.82 (1H, dd, J<sub>H13,H15</sub> = 1 Hz, H<sub>15</sub>), 6.79 (1H, d, H<sub>2</sub>), 6.27 (1H, dd, H<sub>13</sub>), 4.95 (1H, dd, J<sub>H12,H22</sub> = 10 Hz, J<sub>H12,H22'</sub> = 4 Hz, H<sub>12</sub>), 3.96 (3H, s, OCH<sub>3</sub>), 3.95 (3H, s, OCH<sub>3</sub>), 3.48 (1H, dd, J<sub>H22,H22'</sub> = 15 Hz, H<sub>22</sub>), 3.41 (1H, dd, H<sub>22'</sub>). <sup>13</sup>C NMR (125 MHz, CDCl<sub>3</sub>, 298 K): δ (ppm): 157.52 (C5'), 157.20 (C17'), 151.50 (C16), 150.58 (C4), 148.54 (C7), 147.16 (C19), 146.09 (C4'), 145.20 (C16'), 138.67 (C21'), 137.36 (C9'), 134.95 (C12'), 133.19 (C3), 131.10 (C21), 130.13 (C11), 128.96 (C9), 128.96 (C10), 128.91 (C11'), 125.46 (C2), 125.00 (C14), 121.43 (C13), 120.10 (C8), 119.14 (C20), 117.43 (C6), 117.06 (C18), 112.67 (C1), 110.59 (C15), 56.13 (OCH<sub>3</sub>), 56.13 (OCH<sub>3</sub>), 40.76 (C12), 37.15 (C22). HRMS (ESI):  $m/z$  calculated for C<sub>30</sub>H<sub>22</sub>N<sub>2</sub>O<sub>8</sub>+H 539.14489, found: 539.14489.

### General procedure of synthesis of compounds ( 6a-6b) (Scheme 3 in the text):

A stirring solution of (*E*)-bis(6-methoxydibenzo[*b,f*]oksepin-3-yl)diazene (1 mmol) dissolved in dichloromethane (C=5 mM) was flushed with argon. After that, a catalyst - BF<sub>3</sub>·Et<sub>2</sub>O (0.3 mL) was added carefully to a reaction mixture. Then a proper aldehyde (2 mmol) was added dropwise over 2 hours to a stirring solution. The solution turned dark blue and was stirred for 6 hours at room temperature. Afterward, the reaction mixture was quenched by the addition of methanol (10 mL). The mixture was transferred to a separation funnel filled with 20 mL of water. The water layer was washed twice with 20 mL of dichloromethane. Organic layers were dried over anhydrous magnesium sulfate and concentrated to dryness in vacuo. The residue was subjected to column chromatography on silica gel using DCM as a mobile phase.

Characterisation Date of (6a, 6b, 7, 8)

**6a.** yield 49%; time of reaction 24h; orange powder mp = 240 °C;  $^1\text{H}$  NMR (500 MHz,  $\text{CDCl}_3$ , 298 K):  $\delta$  (ppm): 7.92 (2H, d,  $J_{\text{H}2',\text{H}4'} = 2$  Hz,  $\text{H}_{4''}$ ), 7.88 (2H, d,  $J_{\text{H}2,\text{H}4} = 2$  Hz,  $\text{H}_4$ ), 7.73 (2H, dd,  $J_{\text{H}1',\text{H}2'} = 8$  Hz,  $\text{H}_{2'}$ ), 7.72 (2H, dd,  $J_{\text{H}1,\text{H}2} = 8$  Hz,  $\text{H}_2$ ), 7.32 (2H, d,  $\text{H}_{1'}$ ), 7.31 (2H, d,  $\text{H}_1$ ), 7.08 (2H, t,  $J_{\text{H}8,\text{H}7,9} = 8$  Hz,  $\text{H}_8$ ), 6.97 (2H, dd,  $J_{\text{H}7,\text{H}9} = 1.5$  Hz,  $\text{H}_9$ ), 6.92 (2H, AB spin system, d,  $J_{\text{H}10',\text{H}11''} = 11.5$  Hz,  $\text{H}_{10'}$ ), 6.87 (2H, AB spin system, d,  $\text{H}_{11''}$ ), 6.87 (2H, d,  $J_{\text{H}8',9''} = 8.5$  Hz,  $\text{H}_{8'}$ ), 6.82 (2H, AB spin system d,  $J_{\text{H}10,\text{H}11} = 11.5$  Hz,  $\text{H}_{10}$ ), 6.80 (2H, dd,  $\text{H}_7$ ), 6.79 (2H, AB spin system, d,  $\text{H}_{11}$ ), 6.67 (2H, d,  $\text{H}_{9''}$ ), 3.98 (6H, s,  $\text{OCH}_3$ ), 3.97 (2H, s,  $\text{CH}_2$ ), 3.96 (6H, s,  $\text{OCH}_3$ ).  $^{13}\text{C}$  NMR (125 MHz,  $\text{CDCl}_3$ , 298 K):  $\delta$  (ppm): 158.25, 157.75, 153.89, 153.84, 151.92, 150.50, 146.14, 145.07, 133.72, 133.65, 131.63, 131.39, 129.92, 129.87, 129.55, 129.49, 129.35, 129.12, 128.53, 126.10, 124.99, 120.80, 119.97, 119.89, 116.24, 116.19, 112.86, 112.54, 56.32, 56.25, 35.53. HRMS (ESI):  $m/z$  calculated for  $\text{C}_{61}\text{H}_{44}\text{N}_4\text{O}_8 + \text{H}$  961.32319, found: 961.32319.

**6b.** yield 7%; time of reaction 3 weeks; red powder decomposition above 251 °C;  $^1\text{H}$  NMR (500 MHz,  $\text{CDCl}_3$ , 298 K):  $\delta$  (ppm): 8.78 (1H, d,  $J_{\text{H}14,\text{H}16} = 2.5$  Hz,  $\text{H}_{14}$ ), 8.24 (1H, dd,  $J_{\text{H}16,\text{H}17} = 8.5$  Hz,  $\text{H}_{16}$ ), 7.89 (2H, d,  $J_{\text{H}2',\text{H}4'} = 2$  Hz,  $\text{H}_{4''}$ ), 7.88 (2H, d,  $J_{\text{H}2,\text{H}4} = 2$  Hz,  $\text{H}_4$ ), 7.73 (2H, dd,  $J_{\text{H}1',\text{H}2'} = 8$  Hz,  $\text{H}_{2'}$ ), 7.71 (2H, d,  $J_{\text{H}1,\text{H}2} = 8$  Hz,  $\text{H}_2$ ), 7.31 (2H, d,  $\text{H}_{1'}$ ), 7.29 (2H, d,  $\text{H}_1$ ), 7.14 (1H, d,  $\text{H}_{17}$ ), 7.08 (2H, t,  $J_{\text{H}8,\text{H}7,9} = 8$  Hz,  $\text{H}_8$ ), 6.97 (2H, dd,  $J_{\text{H}7,\text{H}9} = 1.5$  Hz,  $\text{H}_9$ ), 6.82 (2H, AB spin system, d,  $J_{\text{H}10',\text{H}11''} = 11.5$  Hz,  $\text{H}_{10'}$ ), 6.82 (2H, AB spin system, d,  $J_{\text{H}10,\text{H}11} = 11.5$  Hz,  $\text{H}_{10}$ ), 6.79 (2H, dd,  $\text{H}_7$ ), 6.79 (2H, AB spin system, d,  $\text{H}_{11'}$ ), 6.75 (1H, s, CH), 6.73 (2H, d,  $J_{\text{H}8',\text{H}9''} = 8.5$  Hz,  $\text{H}_{8'}$ ), 6.72 (2H, AB spin system,  $\text{H}_{11}$ ), 6.33 (2H, d,  $\text{H}_{9'}$ ), 3.98 (6H, s,  $\text{OCH}_3$ ), 3.95 (6H, s,  $\text{OCH}_3$ ).  $^{13}\text{C}$  NMR (125 MHz,  $\text{CDCl}_3$ , 298 K):  $\delta$  (ppm): 158.34, 157.74, 154.05, 153.81, 151.90, 151.46, 146.73, 146.66, 145.04, 144.74, 144.22, 135.77, 133.75, 133.42, 131.61, 131.46, 131.07, 130.59, 130.06, 129.61, 129.52, 129.37, 129.36, 127.07, 126.55, 126.03, 125.02, 120.81, 120.18, 120.02, 116.22, 115.90, 112.88, 111.97, 56.31, 56.15, 44.56. HRMS (ESI):  $m/z$  calculated for  $\text{C}_{67}\text{H}_{46}\text{N}_6\text{O}_{12} + \text{H}$  1127.32464, found: 1127.32465.

**7.** yield 5%; time of reaction 24h; red powder decomposition above 255 °C;  $^1\text{H}$  NMR (500 MHz,  $\text{CDCl}_3$ , 298 K):  $\delta$  (ppm): 7.92 (4H, d,  $J_{\text{H}2',\text{H}4'} = 2$  Hz,  $\text{H}_{4''}$ ), 7.88 (2H, d,  $J_{\text{H}2,\text{H}4} = 2$  Hz,  $\text{H}_4$ ), 7.73 (4H, dd,  $J_{\text{H}1',\text{H}2'} = 7.5$  Hz,  $\text{H}_{2'}$ ), 7.72 (2H, dd,  $J_{\text{H}1,\text{H}2} = 8$  Hz,  $\text{H}_2$ ), 7.32 (4H, d,  $\text{H}_{1'}$ ), 7.31 (2H, d,  $\text{H}_1$ ), 7.08 (2H, t,  $J_{\text{H}8,\text{H}7,9} = 8$  Hz,  $\text{H}_8$ ), 6.97 (2H, dd,  $J_{\text{H}7,\text{H}9} = 1.5$  Hz,  $\text{H}_9$ ), 6.92 (4H, AB spin system, d,  $J_{\text{H}10',\text{H}11''} = 11.5$  Hz,  $\text{H}_{10'}$ ), 6.87 (4H, AB spin system, d,  $\text{H}_{11''}$ ), 6.87 (4H, d,  $J_{\text{H}8',9''} = 8.5$  Hz,  $\text{H}_{8'}$ ), 6.82 (2H, AB spin system, d,  $J_{\text{H}10,\text{H}11} = 11.5$  Hz,  $\text{H}_{10}$ ), 6.80 (2H, dd,  $\text{H}_7$ ), 6.79 (2H, AB spin system, d,  $\text{H}_{11}$ ), 6.67 (4H, d,  $\text{H}_{9''}$ ), 3.98 (12H, s,  $\text{OCH}_3$ ), 3.97 (4H, s,  $\text{CH}_2$ ), 3.96 (6H, s,  $\text{OCH}_3$ ). HRMS (ESI):  $m/z$  calculated for  $\text{C}_{92}\text{H}_{67}\text{N}_6\text{O}_{12} + \text{H}$  1447.48114, found: 1447.48115

**8.** yield 40%; time of reaction 24h; red powder decomposition above 245 °C;  $^1\text{H}$  NMR (500 MHz,  $\text{CDCl}_3$ , 298 K):  $\delta$  (ppm): 7.92 (8H, d,  $J_{\text{H}2',\text{H}4'} = 2$  Hz,  $\text{H}_{4''}$ ), 7.88 (2H, d,  $J_{\text{H}2,\text{H}4} = 2$  Hz,  $\text{H}_4$ ), 7.74 (8H, dd,  $J_{\text{H}1',\text{H}2'} = 8$  Hz,  $\text{H}_{2'}$ ), 7.72 (2H, dd,  $J_{\text{H}1,\text{H}2} = 8$  Hz,  $\text{H}_2$ ), 7.33 (8H, d,  $\text{H}_{1'}$ ), 7.32 (2H, d,  $\text{H}_1$ ), 7.07 (2H, t,  $J_{\text{H}8,\text{H}7,9} = 8$  Hz,  $\text{H}_8$ ), 6.96 (2H, dd,  $J_{\text{H}7,\text{H}9} = 1.5$  Hz,  $\text{H}_9$ ), 6.92 (8H, AB spin system, d,  $J_{\text{H}10',\text{H}11''} = 11.5$  Hz,  $\text{H}_{10'}$ ), 6.91 (8H, AB spin system, d,  $\text{H}_{11''}$ ), 6.87 (8H, d,  $J_{\text{H}8',9''} = 8.5$  Hz,  $\text{H}_{8'}$ ), 6.82 (2H, AB spin system, d,  $J_{\text{H}10,\text{H}11} = 11.5$  Hz,  $\text{H}_{10}$ ), 6.79 (2H, dd,  $\text{H}_7$ ), 6.79 (2H, AB spin system, d,  $\text{H}_{11}$ ), 6.67 (8H, d,  $\text{H}_{9''}$ ), 3.98 (6H, s,  $\text{OCH}_3$ ), 3.98 (8H, s,  $\text{CH}_2$ ), 3.96 (24H, s,  $\text{OCH}_3$ ).  $^{13}\text{C}$  NMR (125 MHz,  $\text{CDCl}_3$ , 298 K):  $\delta$  (ppm): 158.29, 157.79, 153.93, 153.88, 151.96, 150.53, 146.22, 145.15, 133.77, 133.73, 131.66, 131.40, 129.94, 129.86, 129.57, 129.55, 129.36, 129.13, 128.54, 126.13, 124.99, 120.84, 119.96, 119.89, 116.25, 116.18, 112.86, 112.63, 56.32, 56.28, 35.54. HRMS (ESI):  $m/z$  calculated for  $\text{C}_{154}\text{H}_{110}\text{N}_{10}\text{O}_{20} + \text{H}$  2419.79706, found: 2419.79708.



**Table S1.** The reaction of methoxy derivative 3-nitrodibenzo[*b,f*]oxepines with paraformaldehyde and in the presence of a Lewis acid as the catalyst.

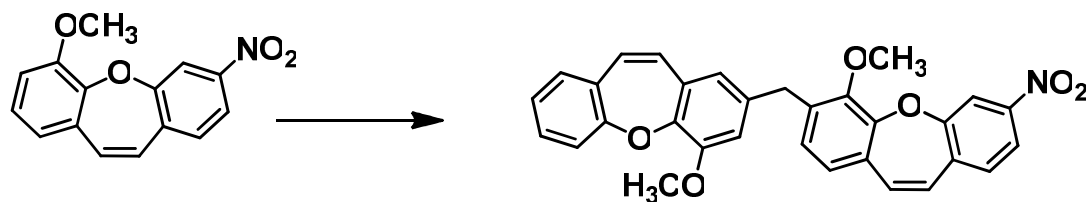

| Lewis acid                        | Conditions                            | Yield   |
|-----------------------------------|---------------------------------------|---------|
| BF <sub>3</sub> ·OEt <sub>2</sub> | room temperature, DCM and under argon | 90%     |
| ZnCl <sub>2</sub>                 | room temperature, DCM and under argon | -       |
| AlCl <sub>3</sub>                 | room temperature, DCM and under argon | -       |
| TiCl <sub>4</sub>                 | room temperature, DCM and under argon | mixture |
| Scandium triflate                 | room temperature, DCM and under argon | mixture |

The structure of (**4c3/4c4**) was determined by gs-HSQC and gs-HMBC spectra. Only one structure of (**4c**) is observed but by NMR spectra is not possible unambiguously to tell which. Based on the chemical shift analysis we postulate the structure of (**4c4**).

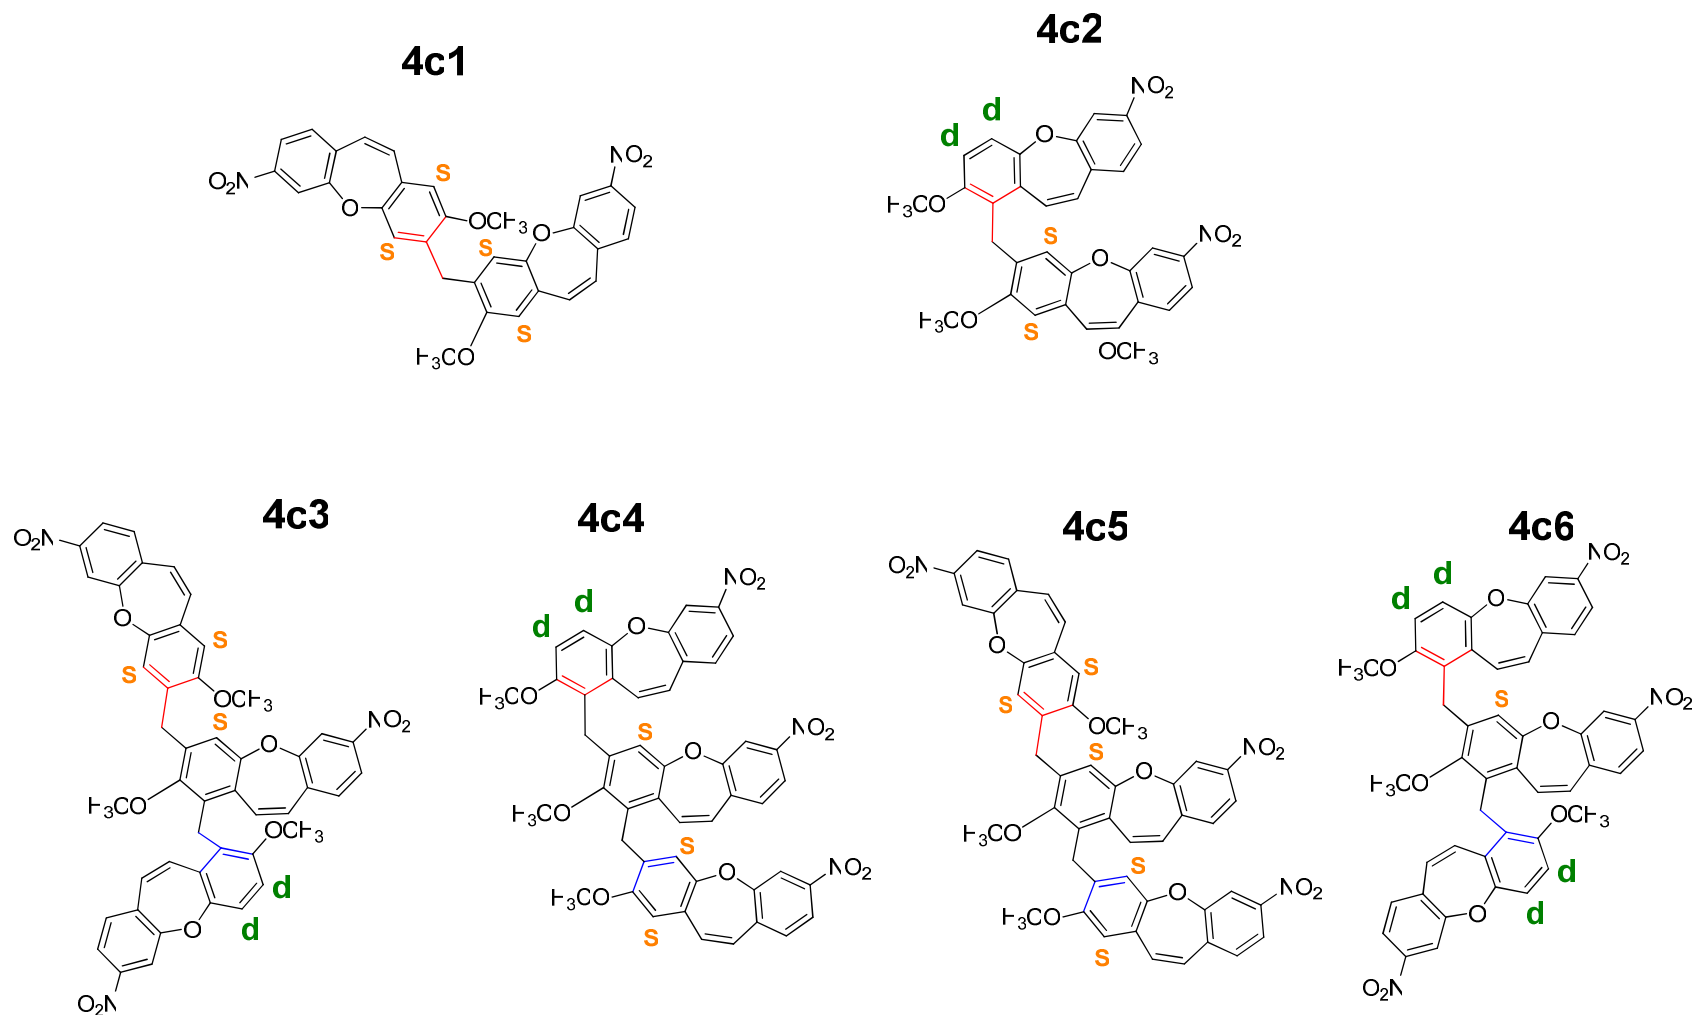

**Figure S1.** Possible dimmer and trimer products in the reaction 2-methoxy-7-nitrodibenzo[b,f]oxepine with paraformaldehyde and in the presence of  $\text{BF}_3 \cdot \text{OEt}_2$  (letter of orange colors- singlet, letter of green color d-doublet in  $^1\text{H}$  NMR spectrum).

### 3. NMR spectra of obtained compounds

All the spectra were recorded using a Varian VNMRs spectrometer operating at 11.7 T and Varian Mercury VX 9.4 T magnetic field. Measurements were performed for ca. 1.0 M solutions of all the compounds in DMSO- $d_6$  or  $CDCl_3$ . The residual signals of DMSO- $d_6$  (2.54 ppm) and  $CDCl_3$  (7.26 ppm) in  $^1H$  NMR and of the DMSO- $d_6$  signal (40.4 ppm) and of  $CDCl_3$  (77.0 ppm) in  $^{13}C$  NMR spectra were used as the chemical shift references. Spin multiplicities are described as s (singlet), d(doublet), t (triplet), q (quartet), m (multiplet), dd (double doublet). Coupling constants are reported in Hertz. All the proton spectra were recorded using the standard spectrometer software and parameters set: acquisition time 3s, pulse angle  $30^\circ$ . The standard measurement parameter set for  $^{13}C$  NMR spectra was: pulse width 7  $\mu s$  (the  $90^\circ$  pulse width was 12.5  $\mu s$ ), acquisition time 1 s, spectral width 200 ppm, 1000 scans of 32 K data point were accumulated and after zero-filling to 64 K; and the FID signals were subjected to Fourier transformation after applying a 1 Hz line broadening. The  $^1H$ - $^{13}C$ gs-HSQC and  $^1H$ - $^{13}C$ gs-HMBC spectra were also recorded using the standard Varian software.

Copies of  $^1\text{H}$  NMR and  $^{13}\text{C}$  NMR spectra of (2a-h)

$^1\text{H}$  NMR of compound (2a):

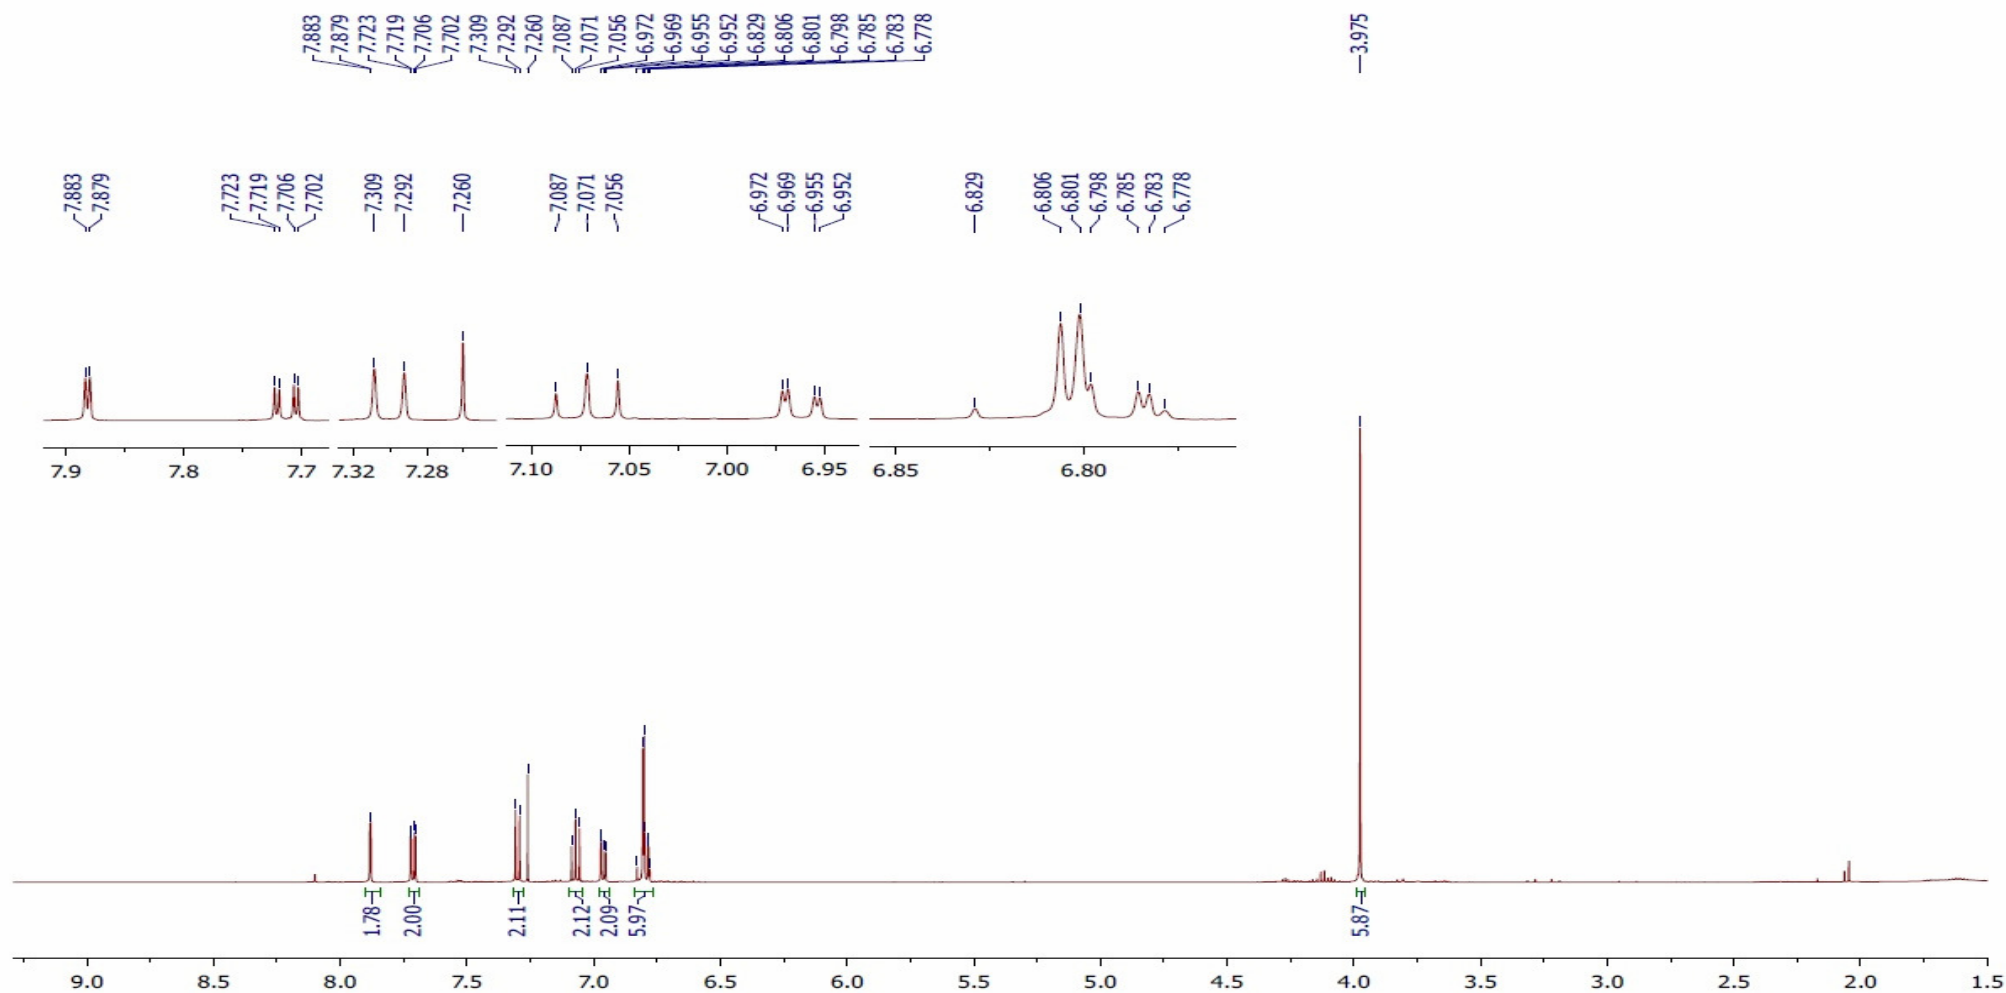

**$^{13}\text{C}$  NMR of compound (2a):**

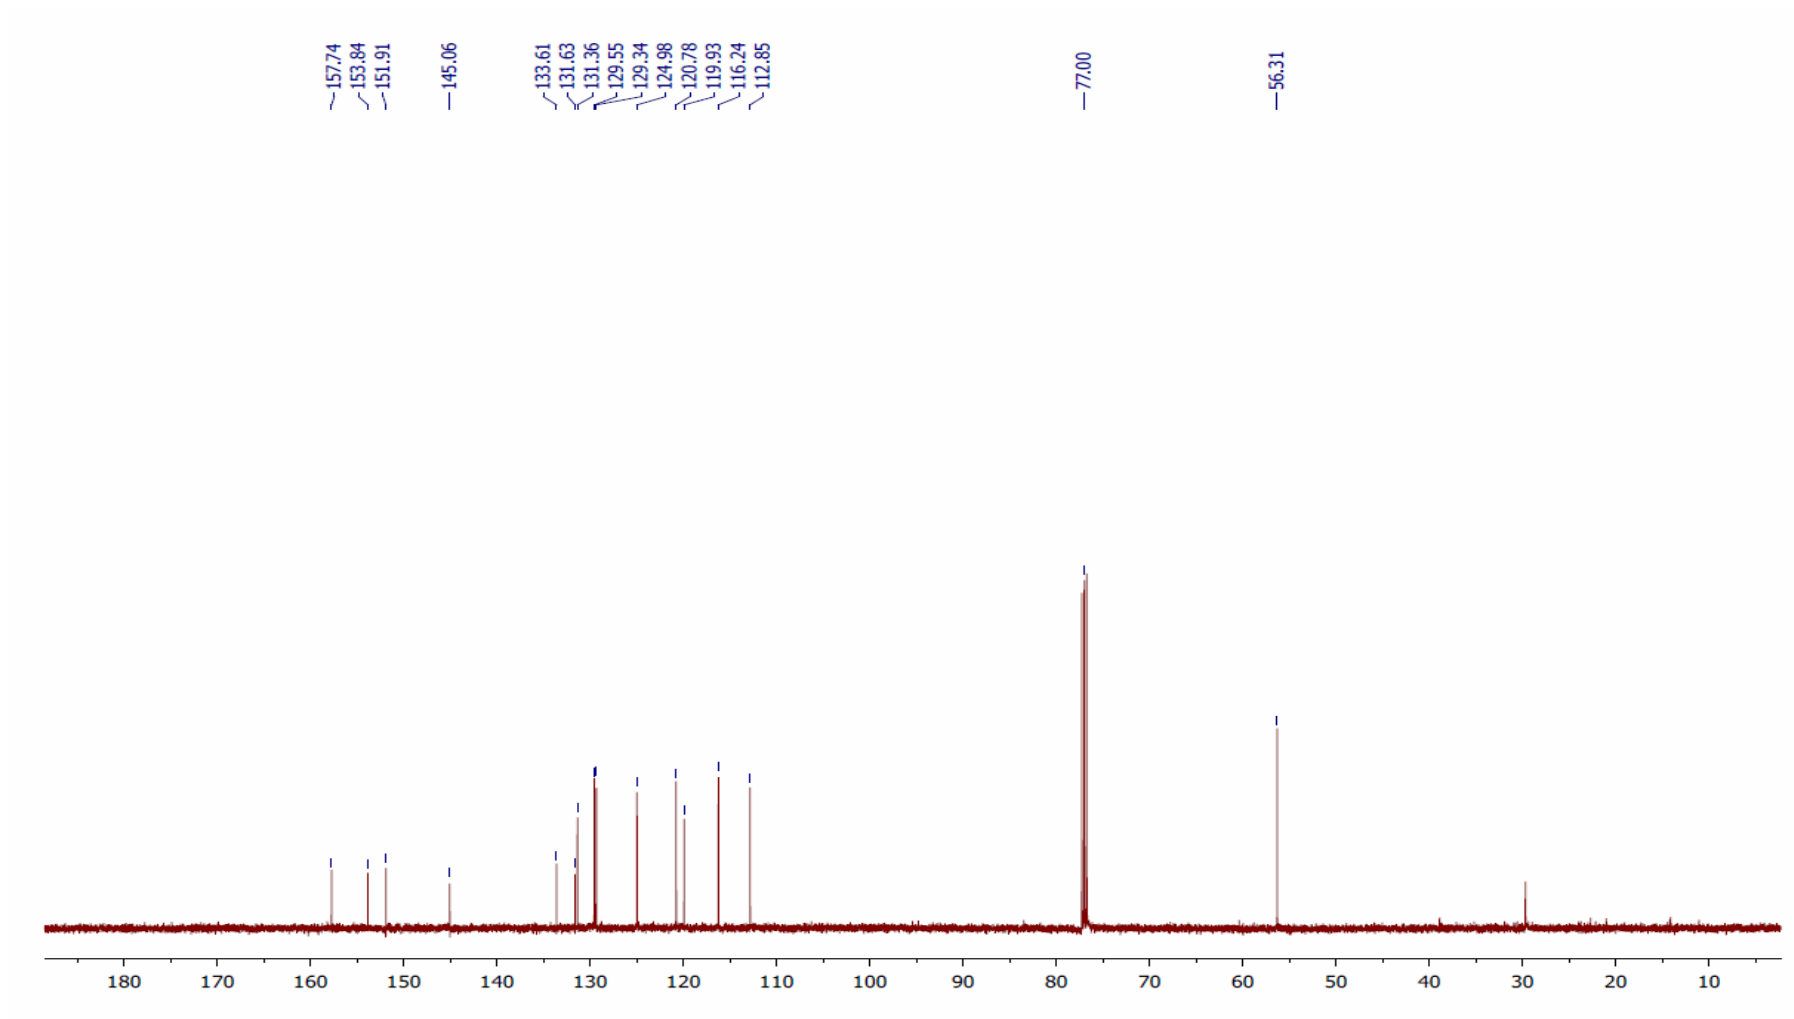

**$^1\text{H}$  NMR of compound (2b):**

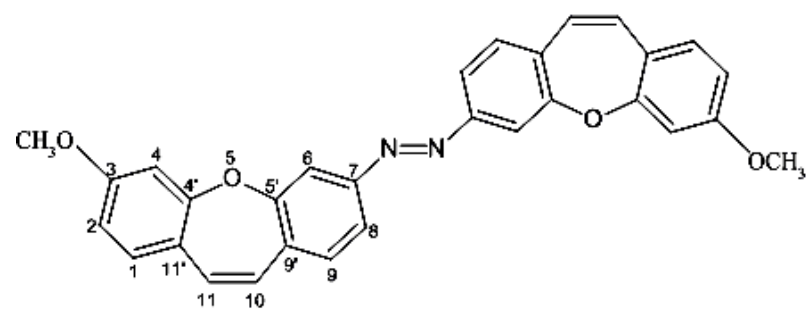

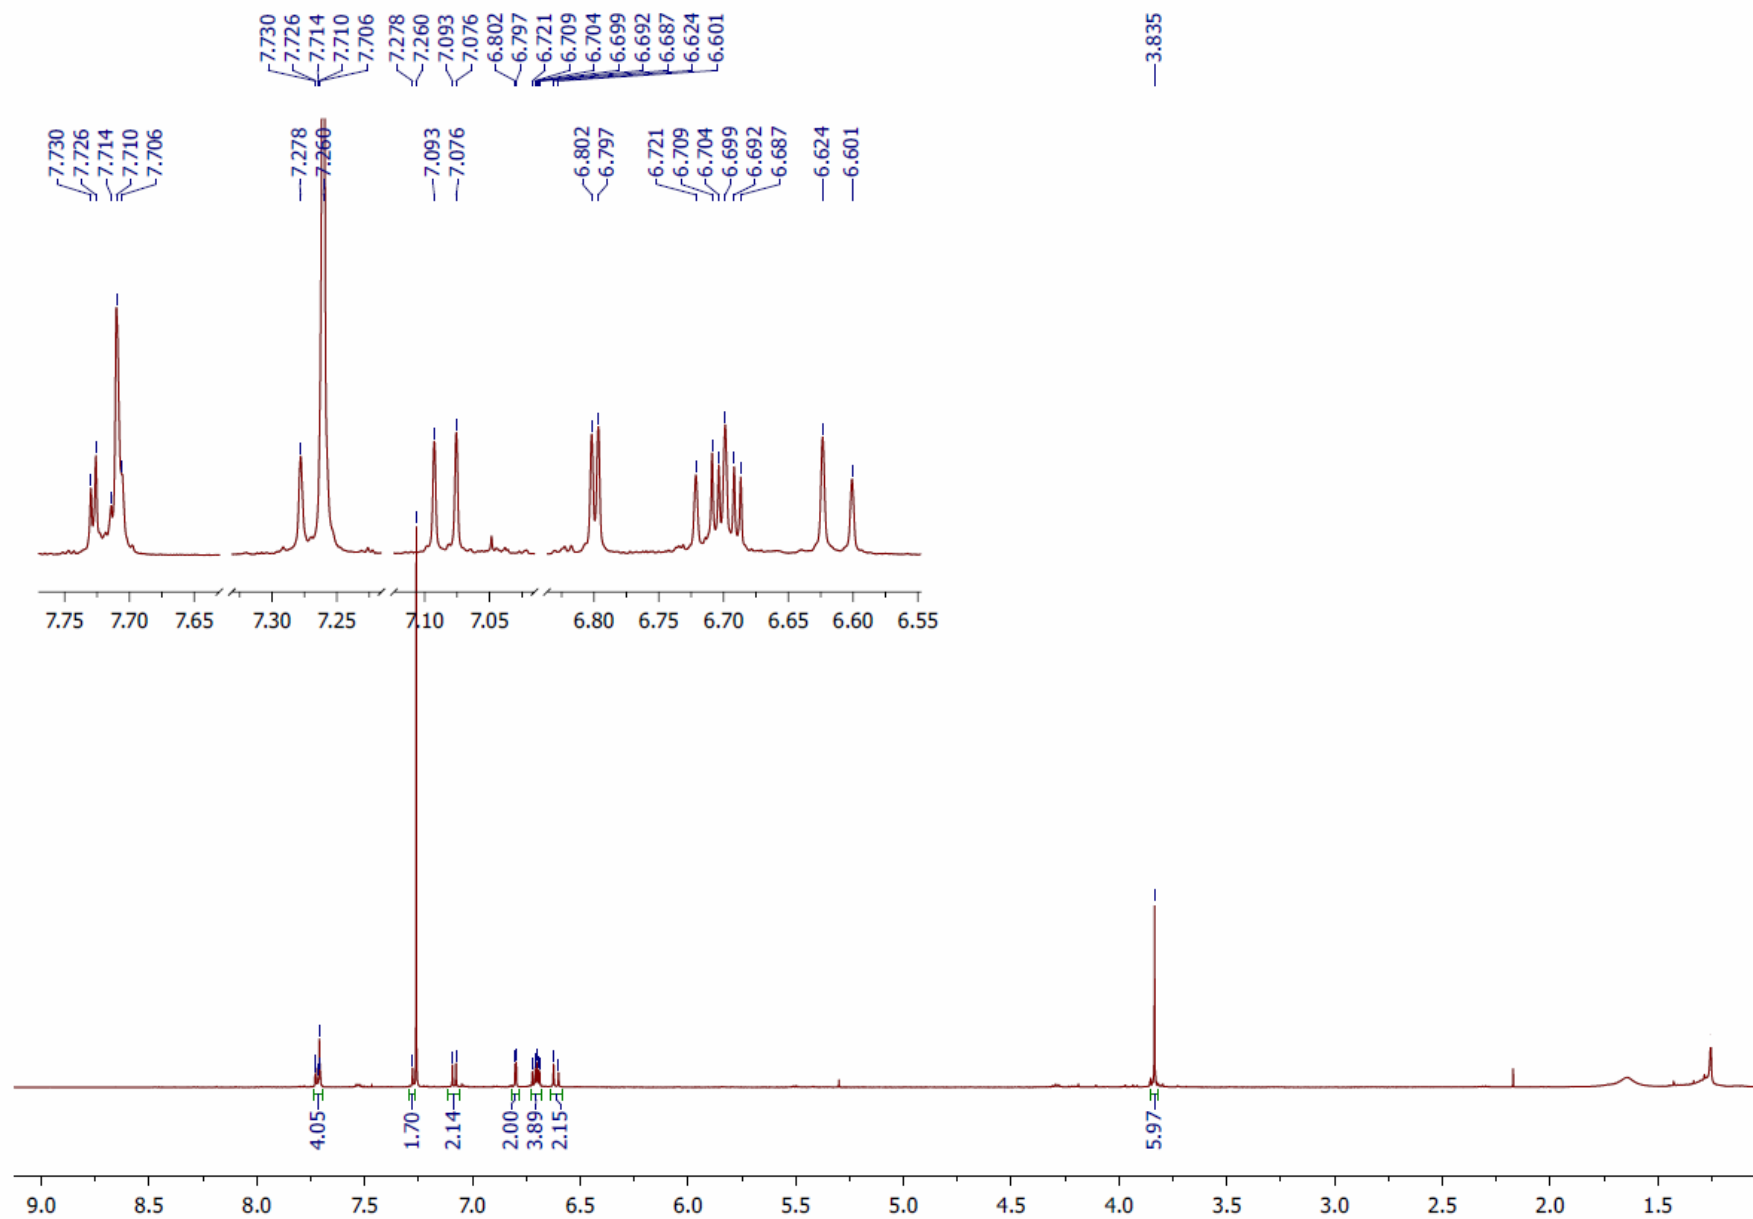

**$^{13}\text{C}$  NMR of compound (2b):**

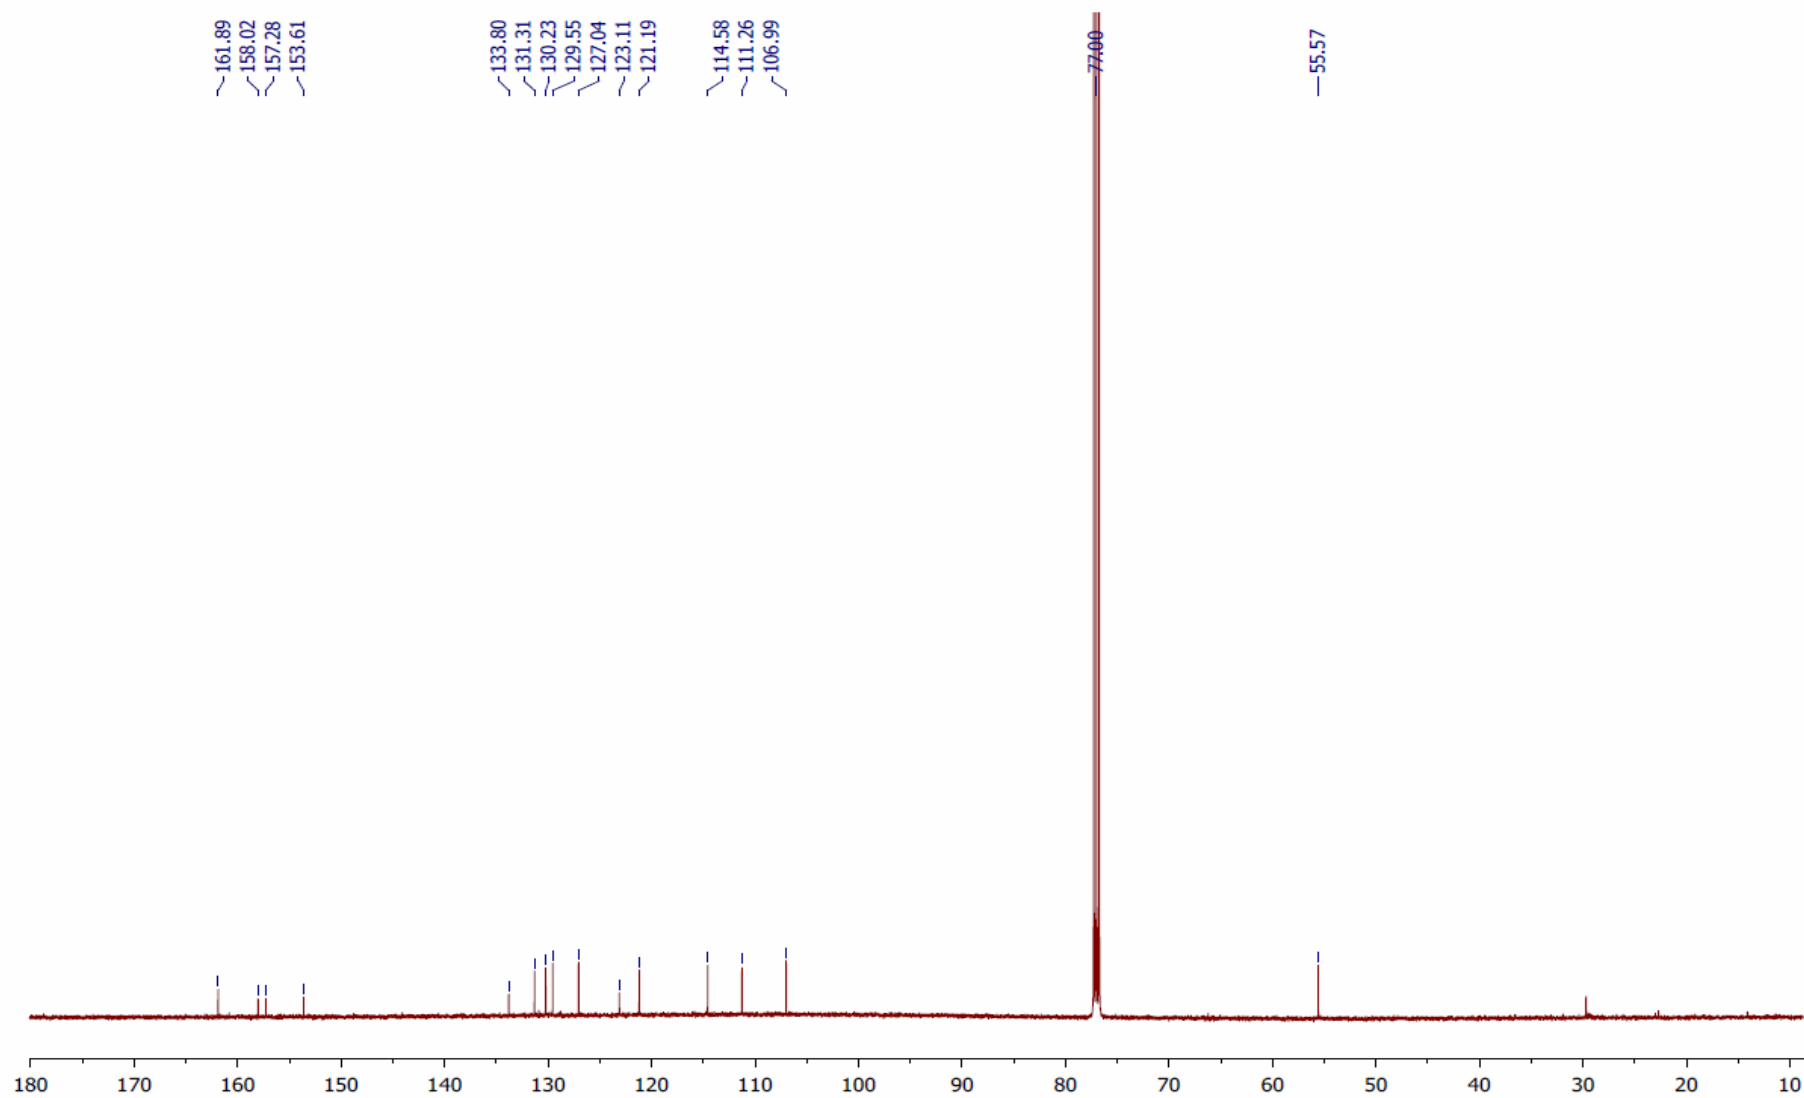



**$^1\text{H}$  NMR of compound (2c):**

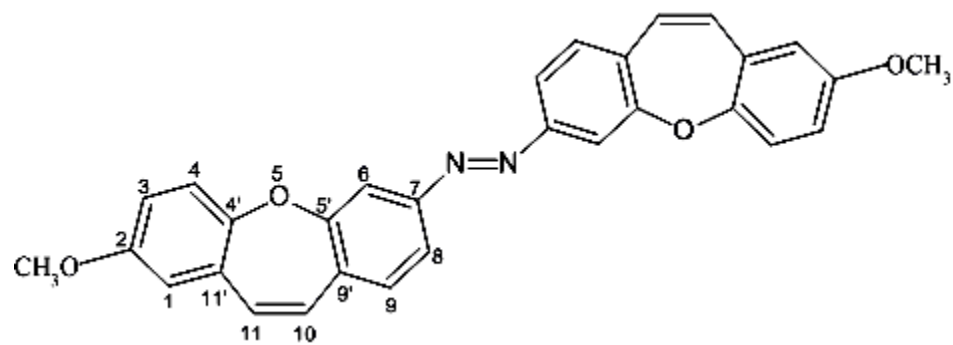

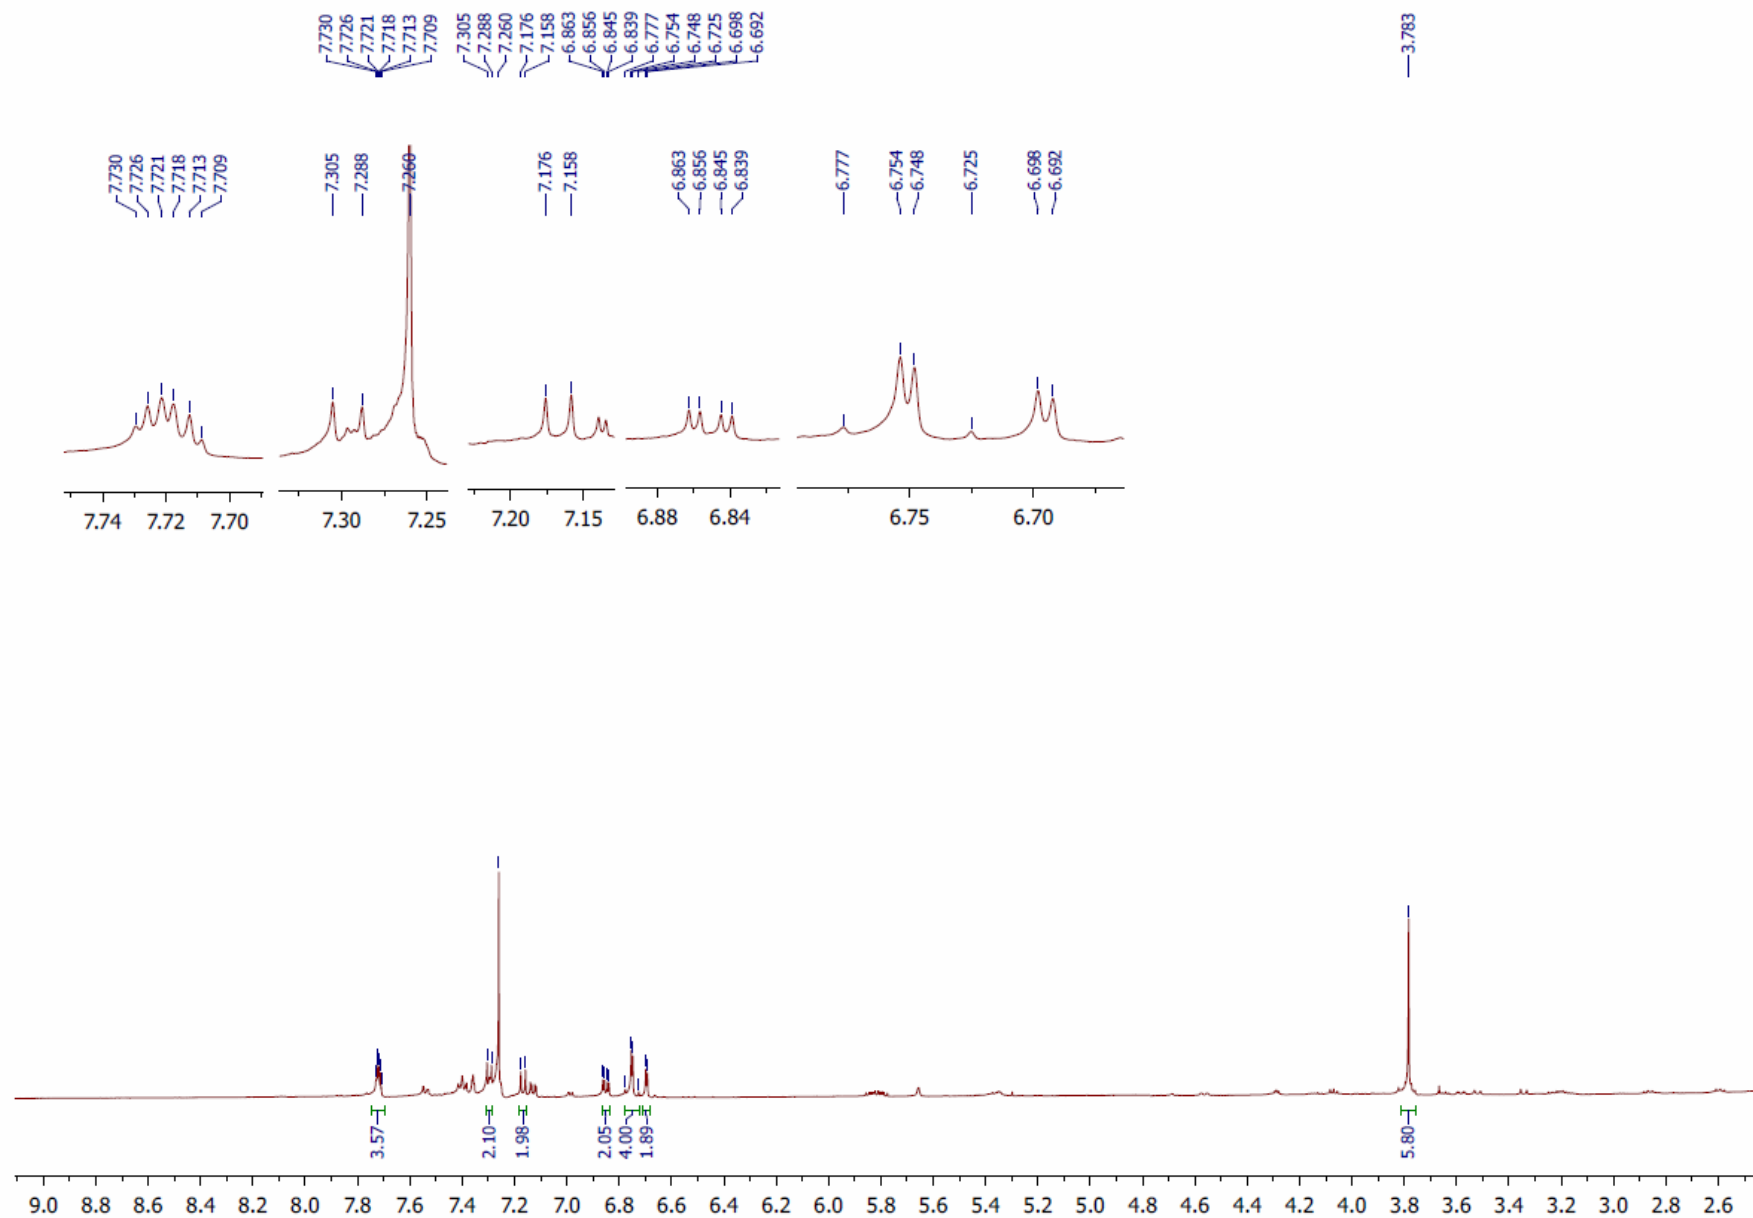

**$^{13}\text{C}$  NMR of compound (2c):**

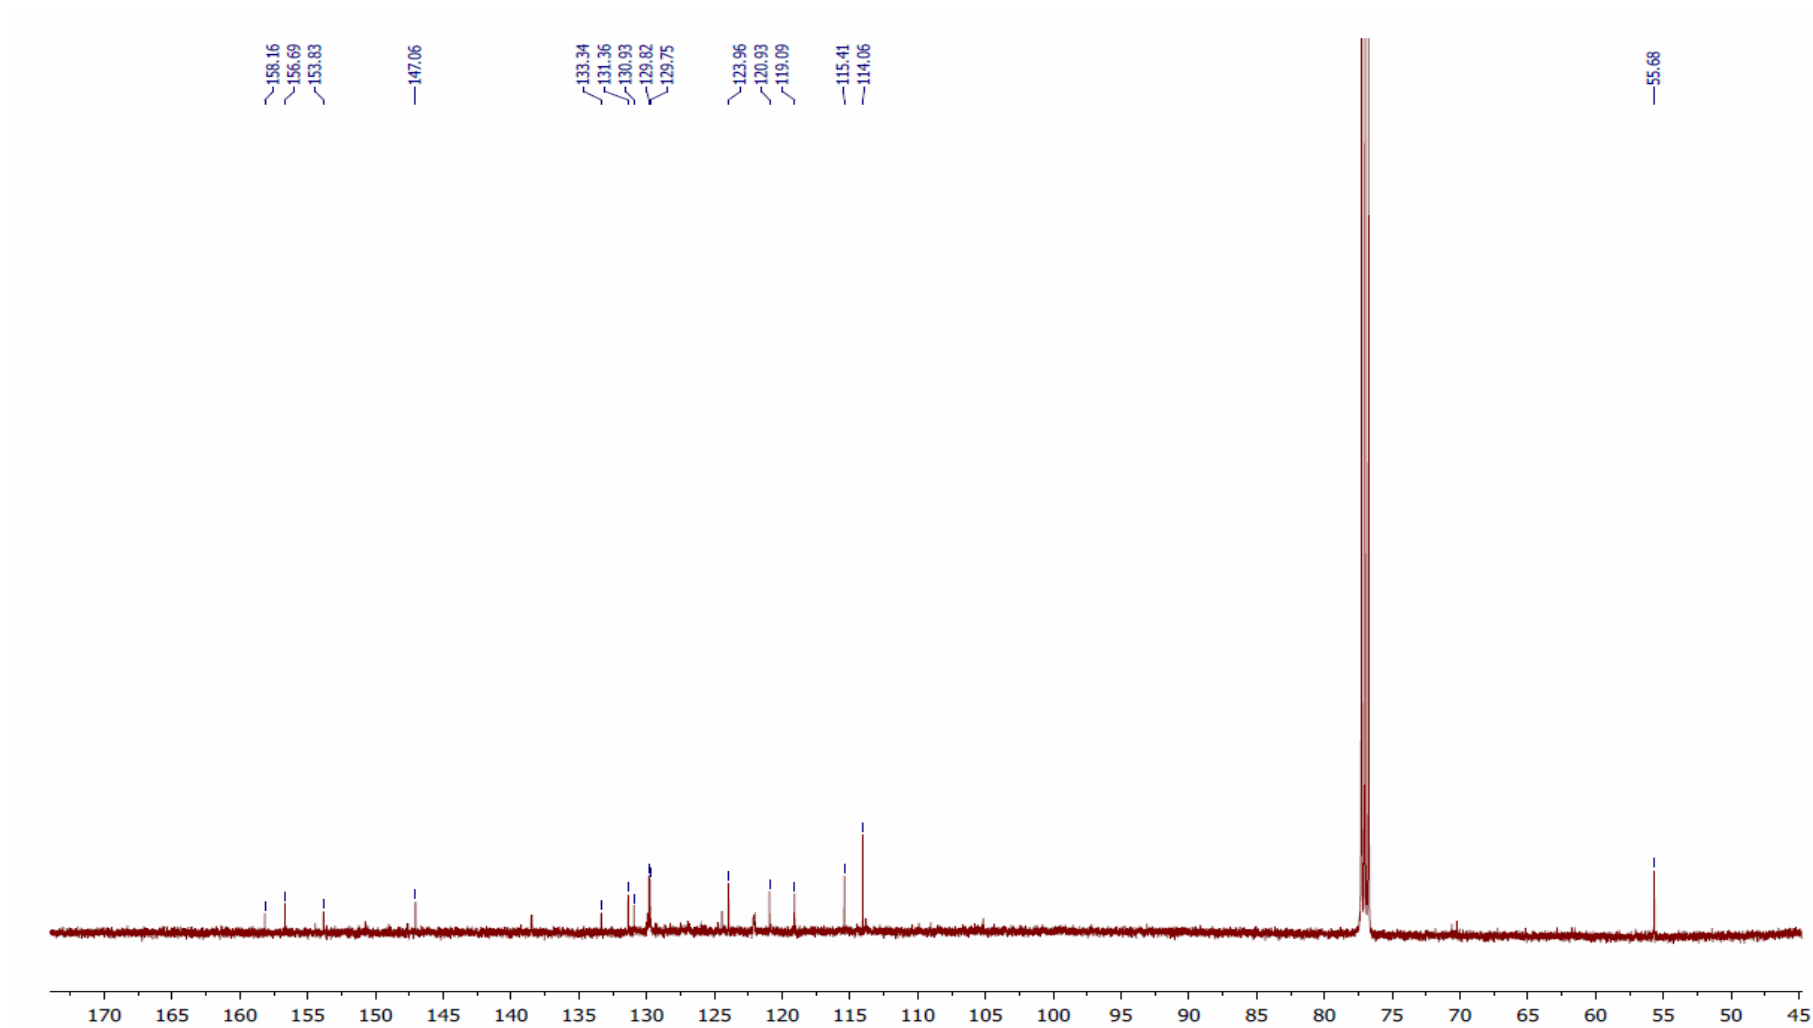

**$^1\text{H}$  NMR of compound (2d):**

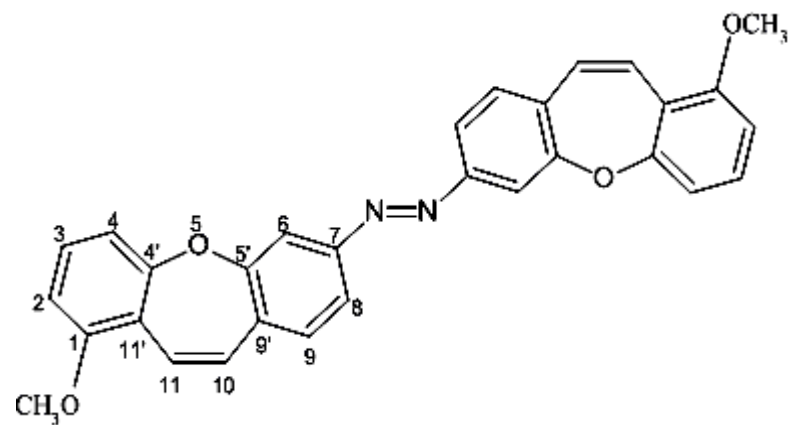

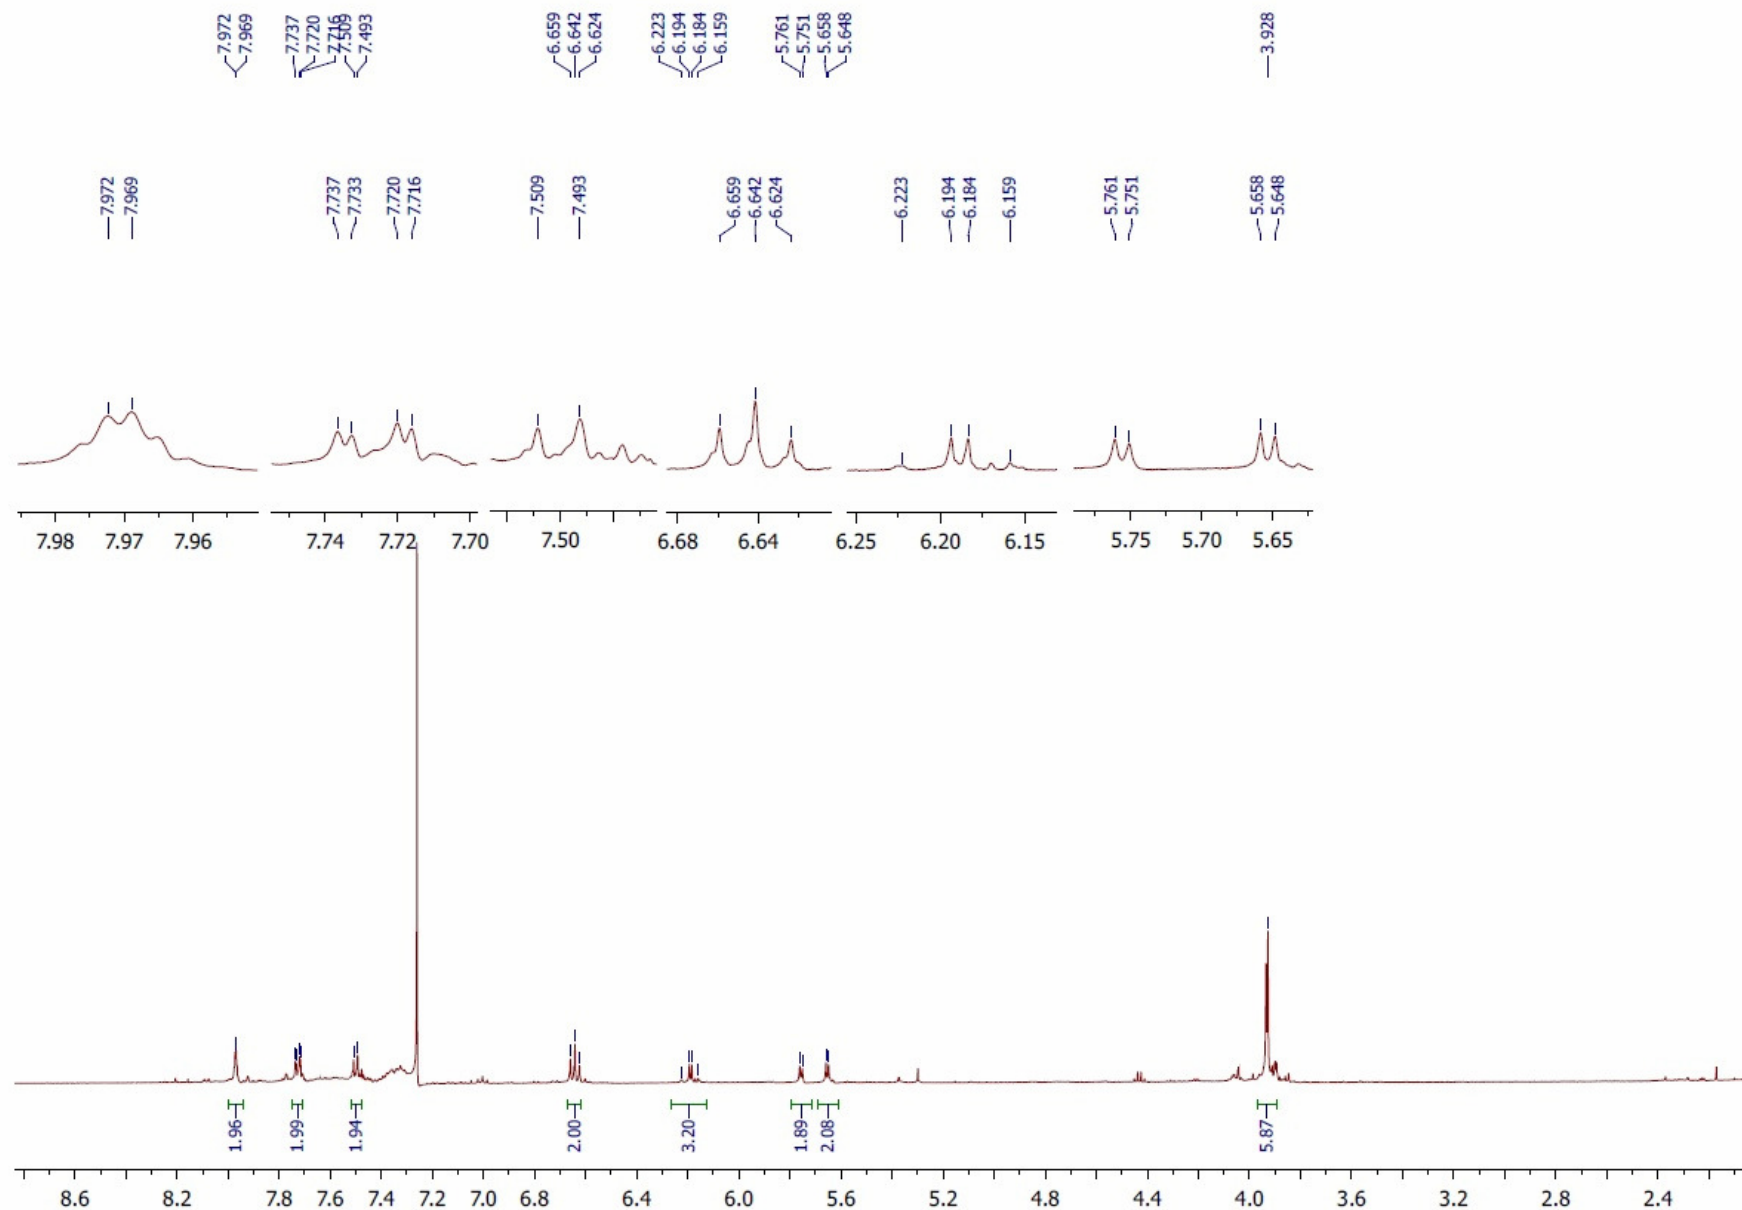

**$^{13}\text{C}$  NMR of compound (2d):**

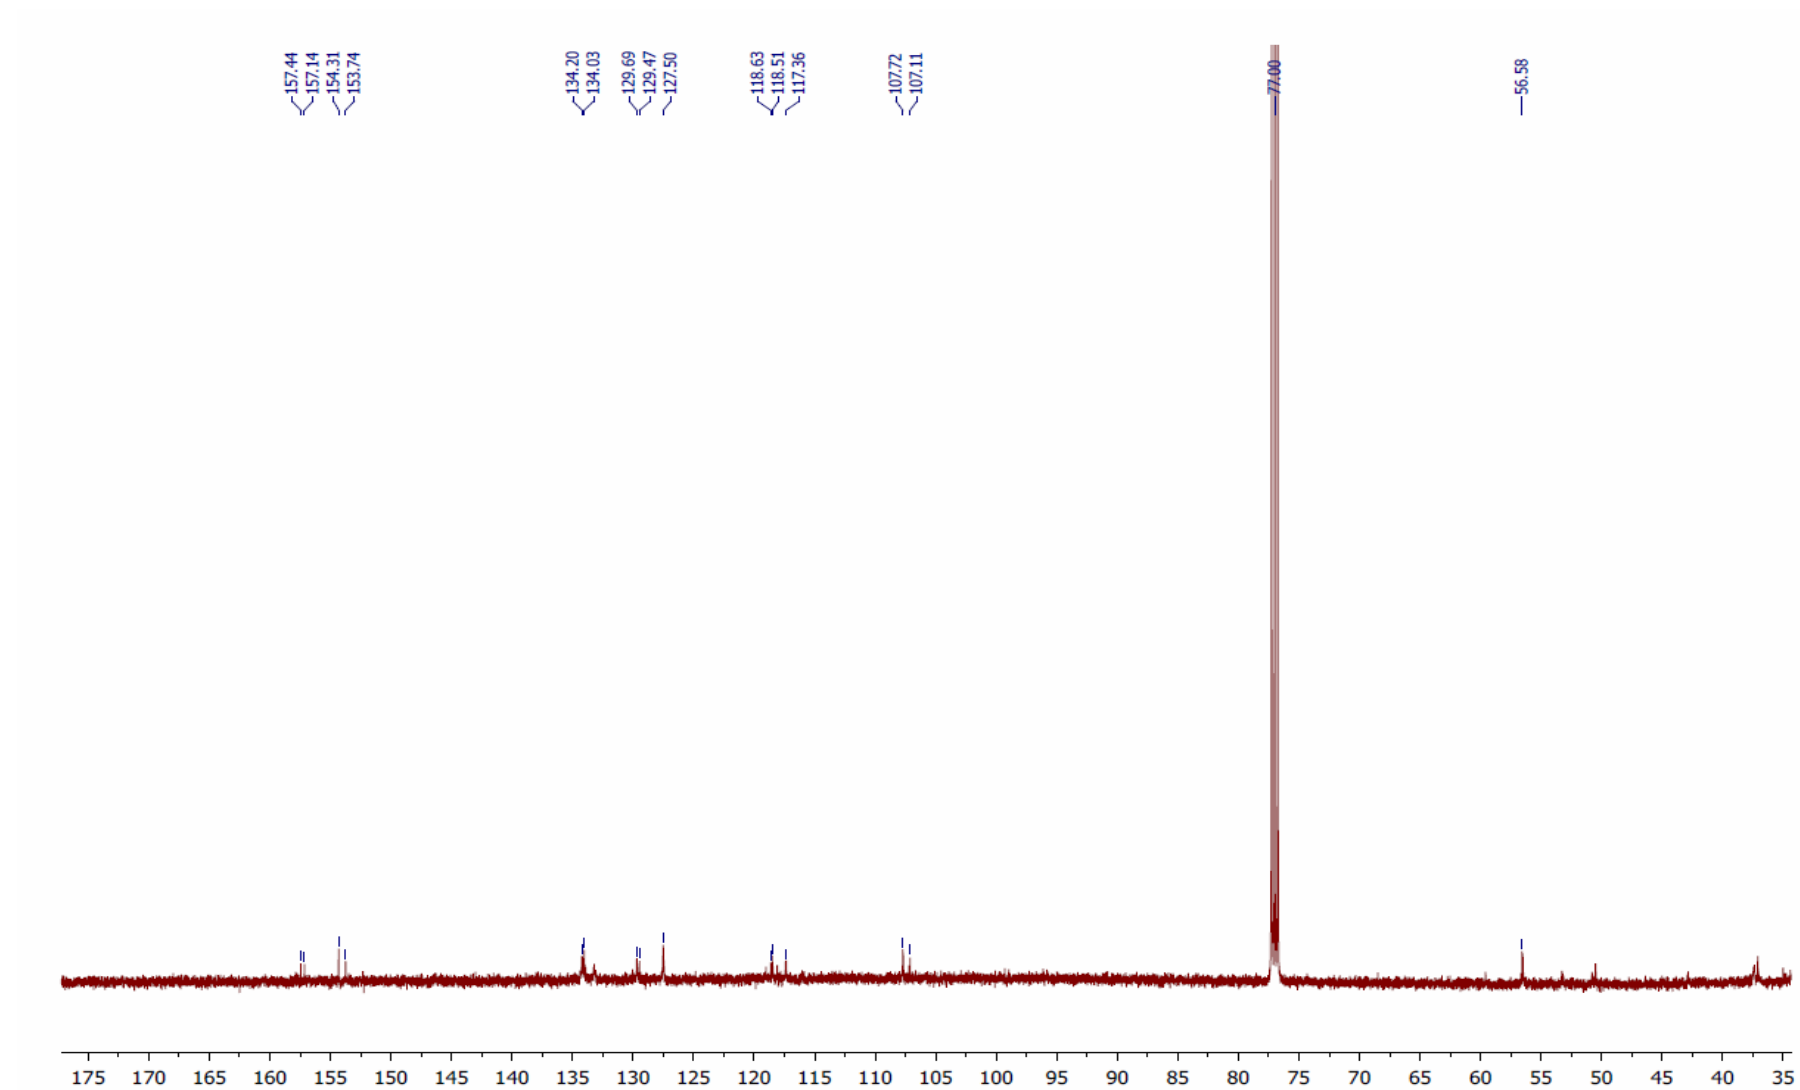

<sup>1</sup>H NMR of compound (2e):

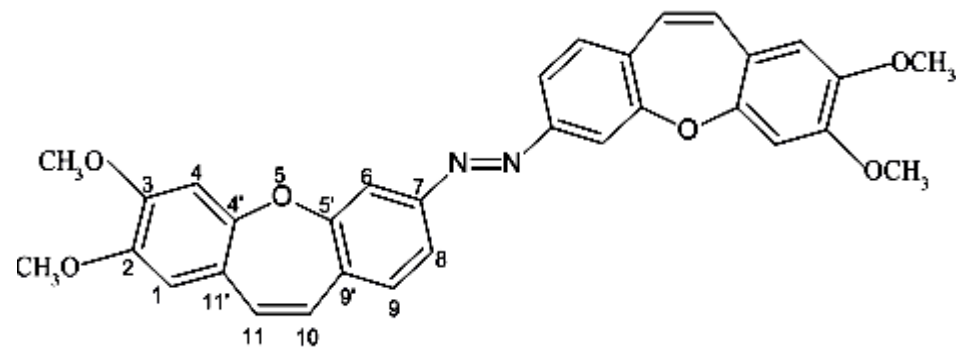

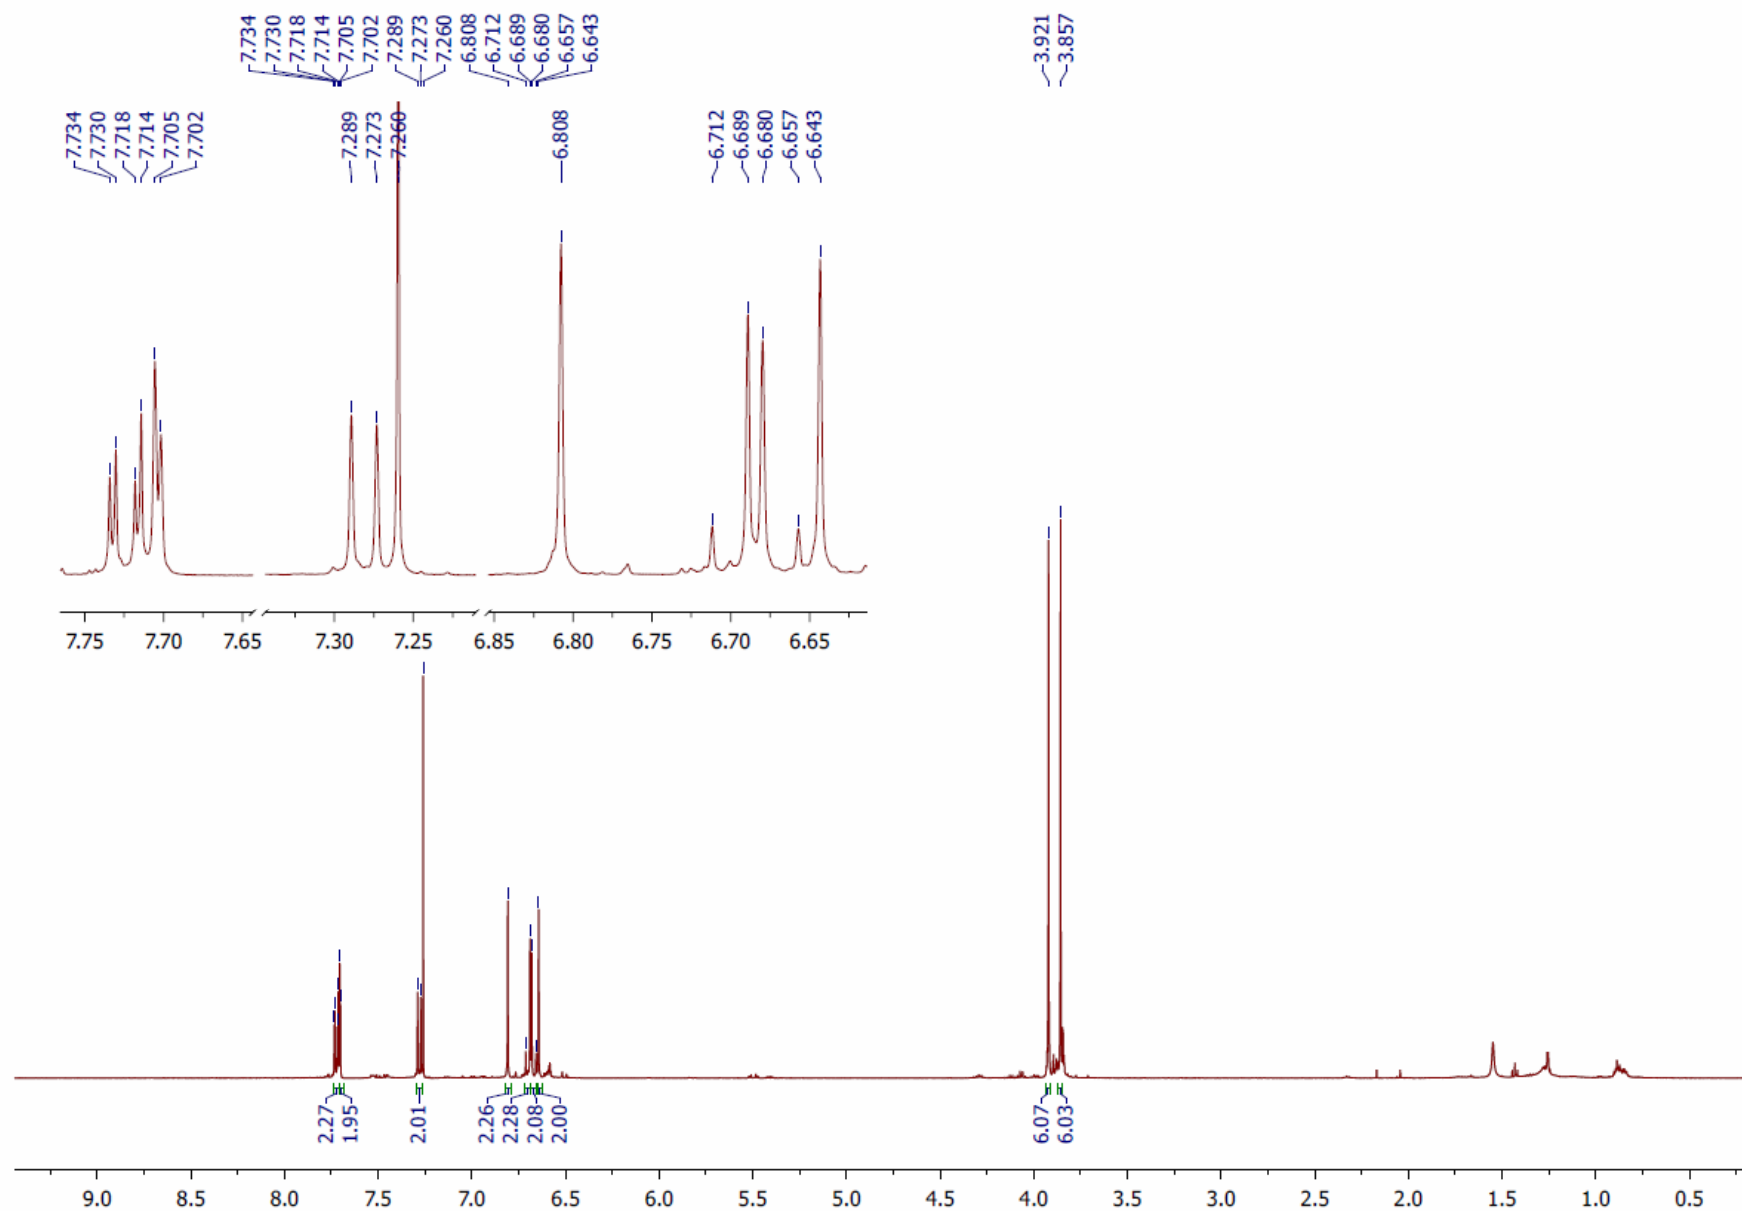



**$^{13}\text{C}$  NMR of compound (2e):**

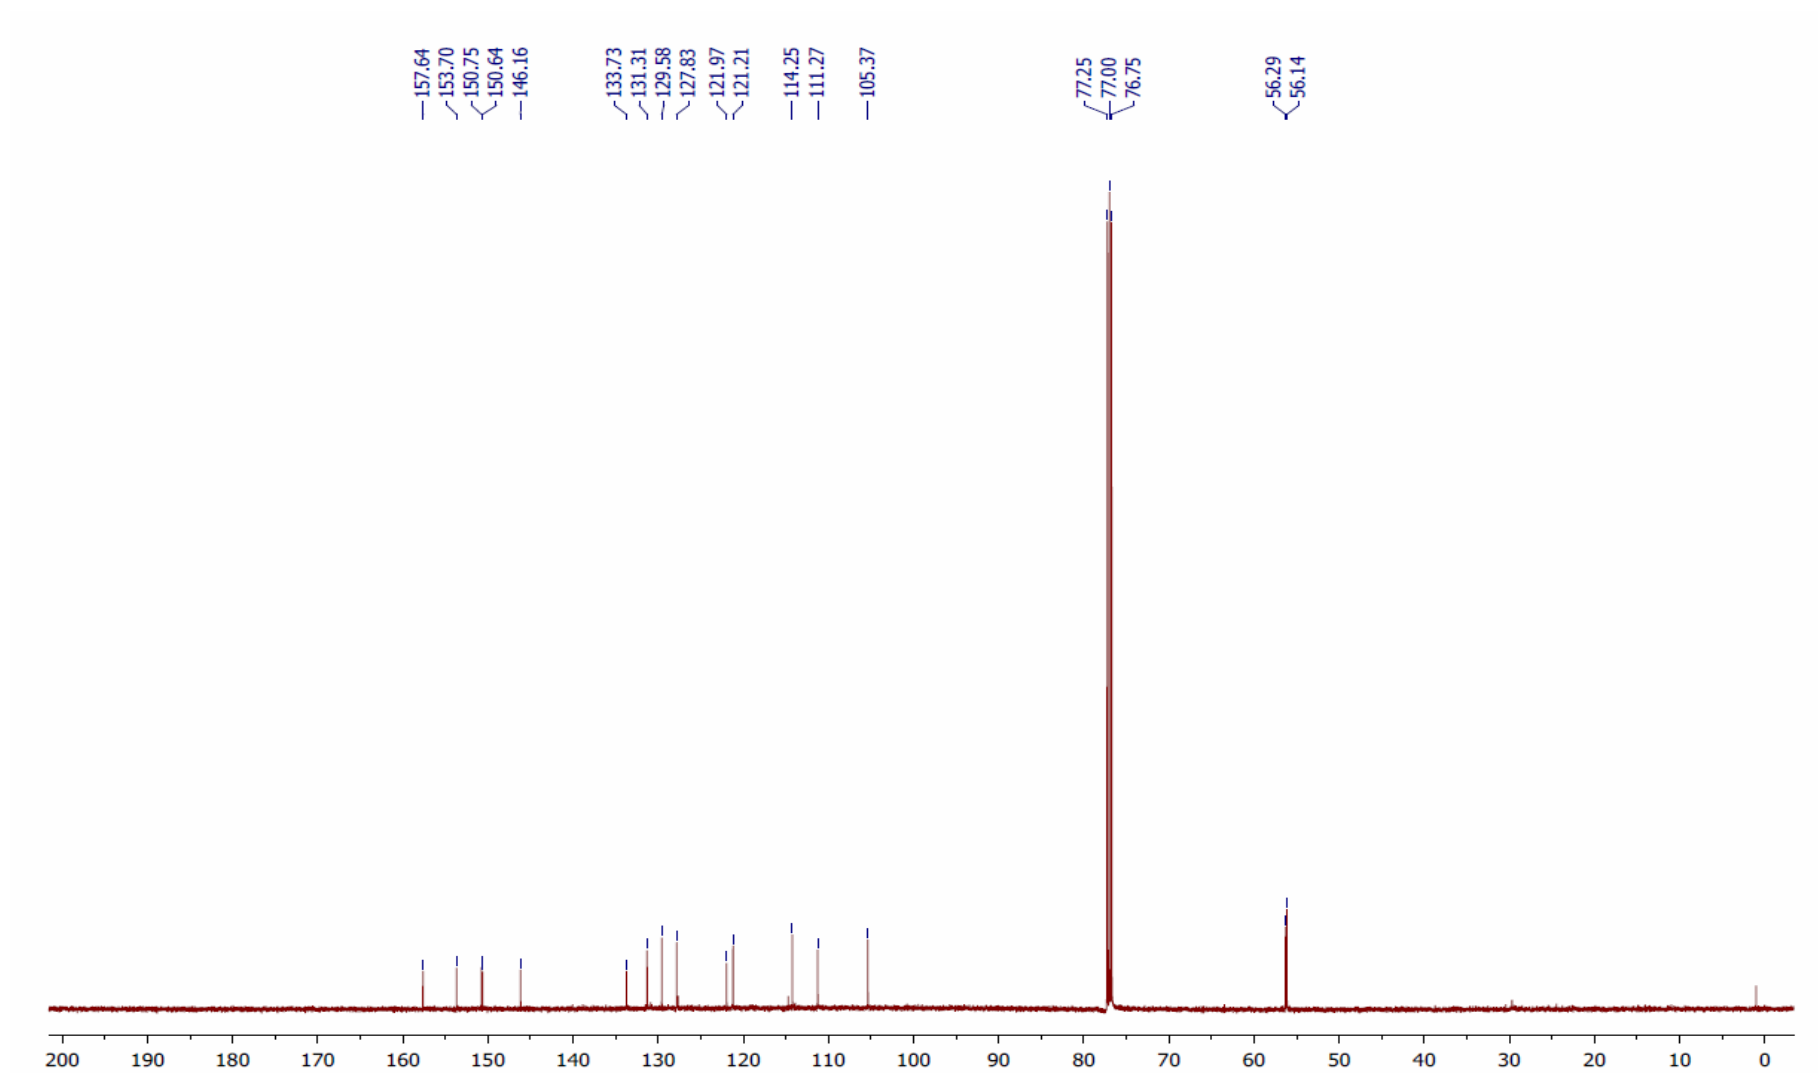

**$^1\text{H}$  NMR of compound (2f):**

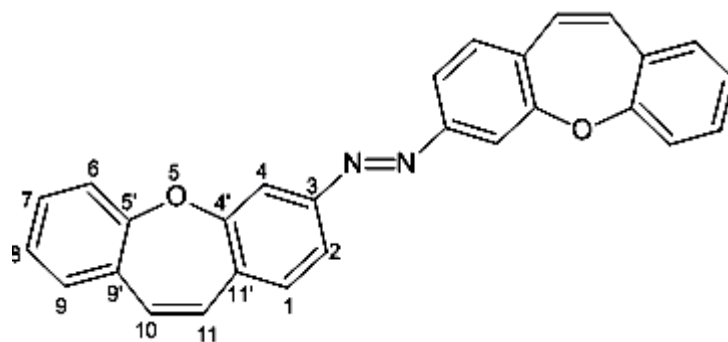

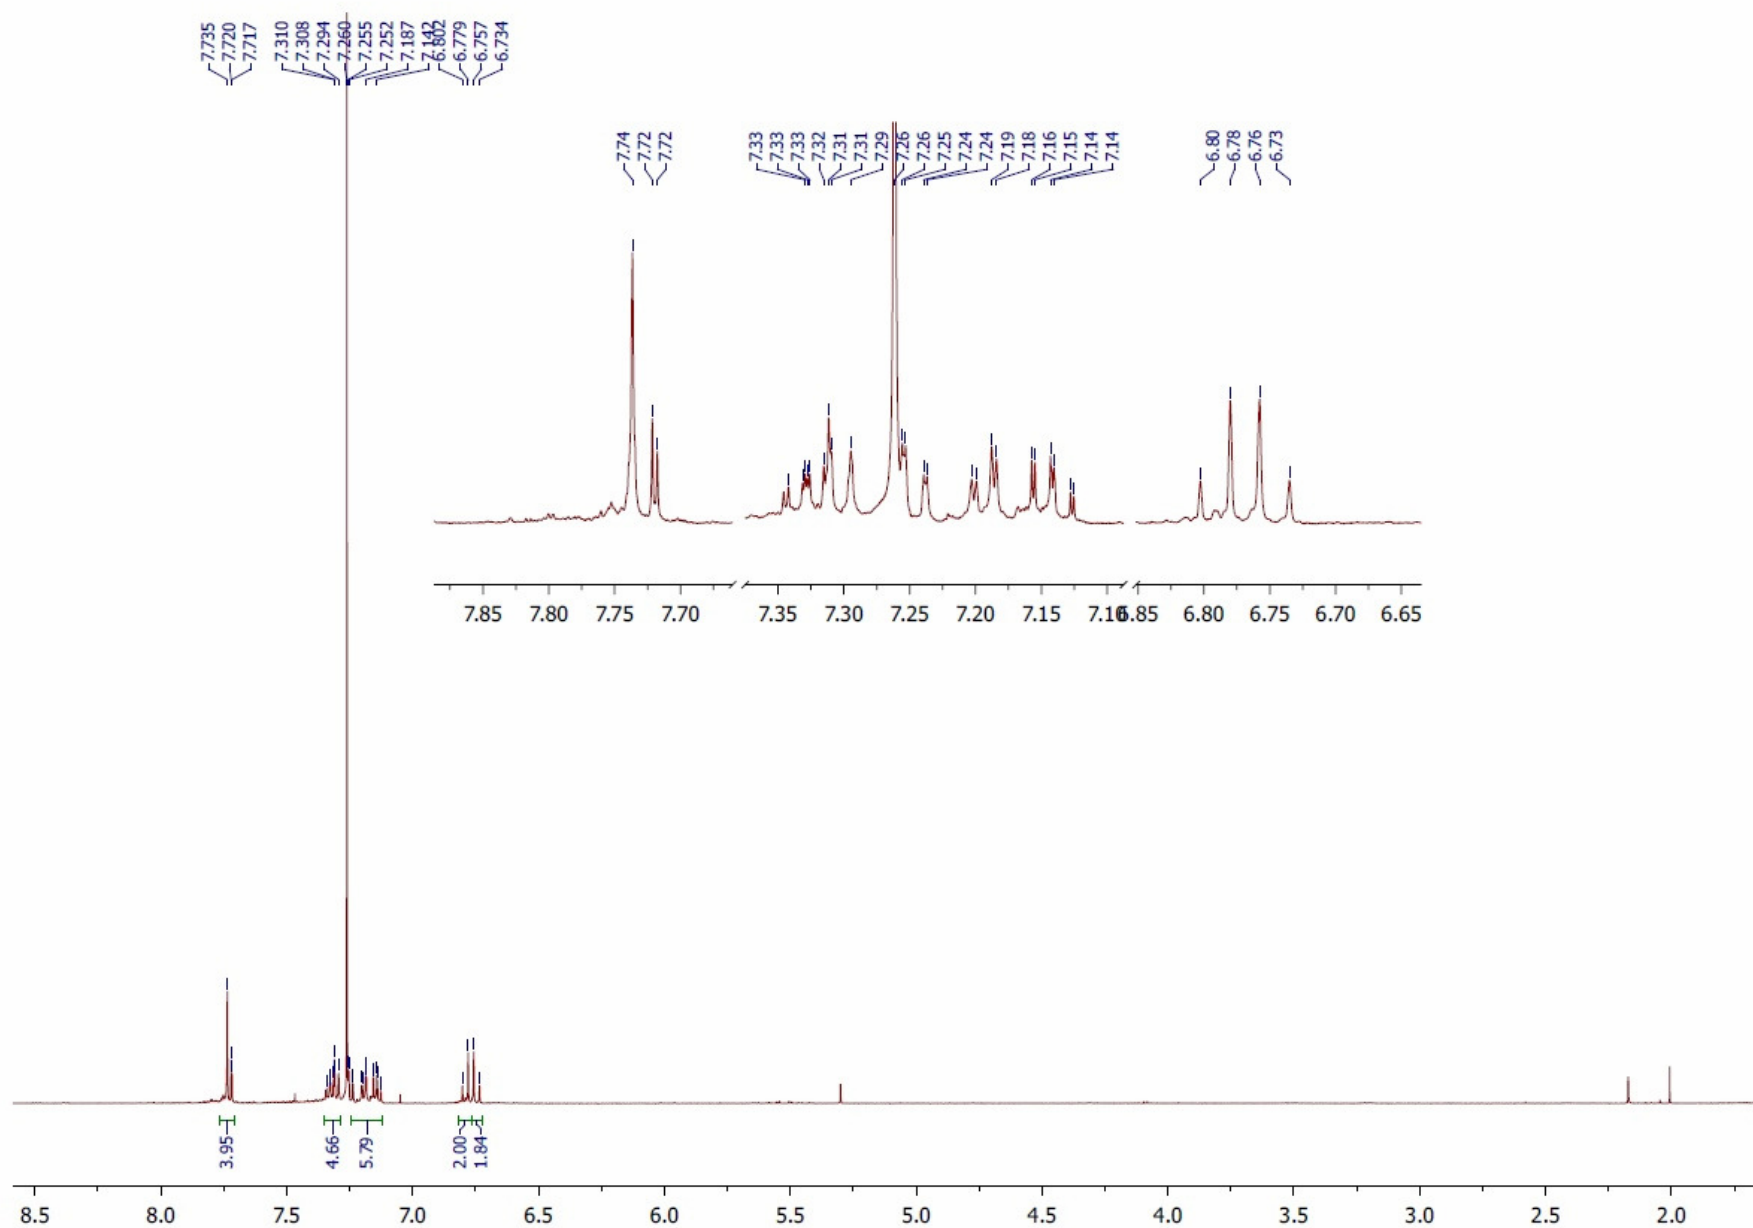

**$^{13}\text{C}$  NMR of compound (2f):**

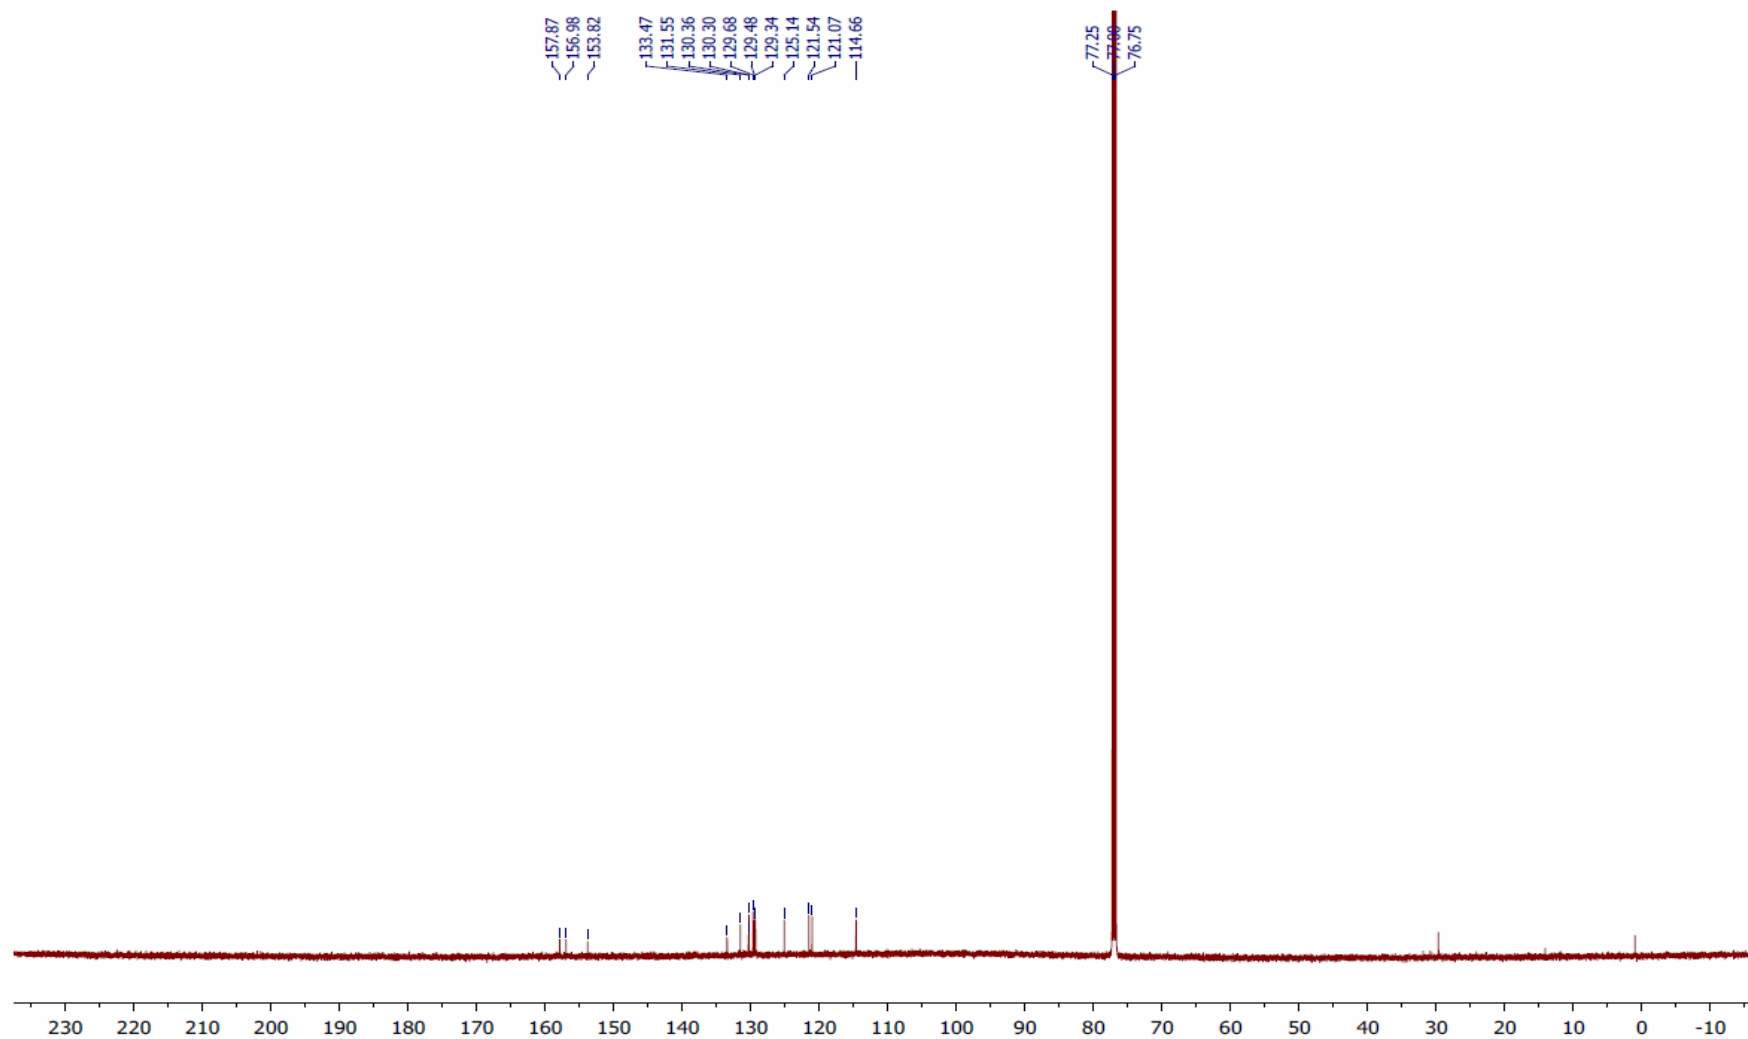

$^1\text{H}$  NMR of compound (2g)

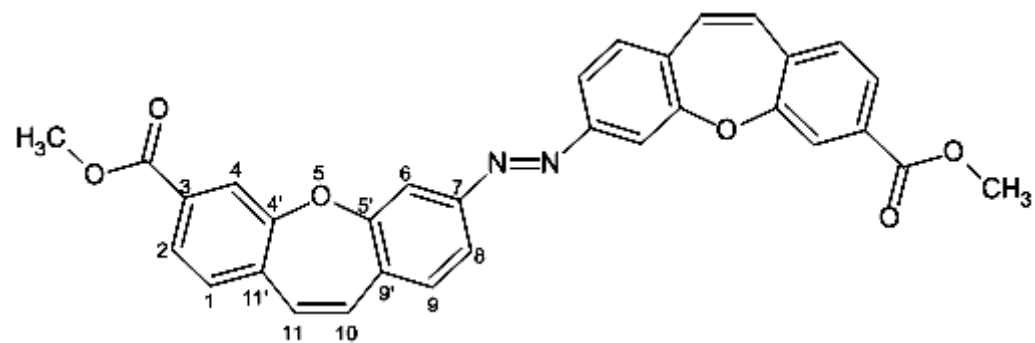

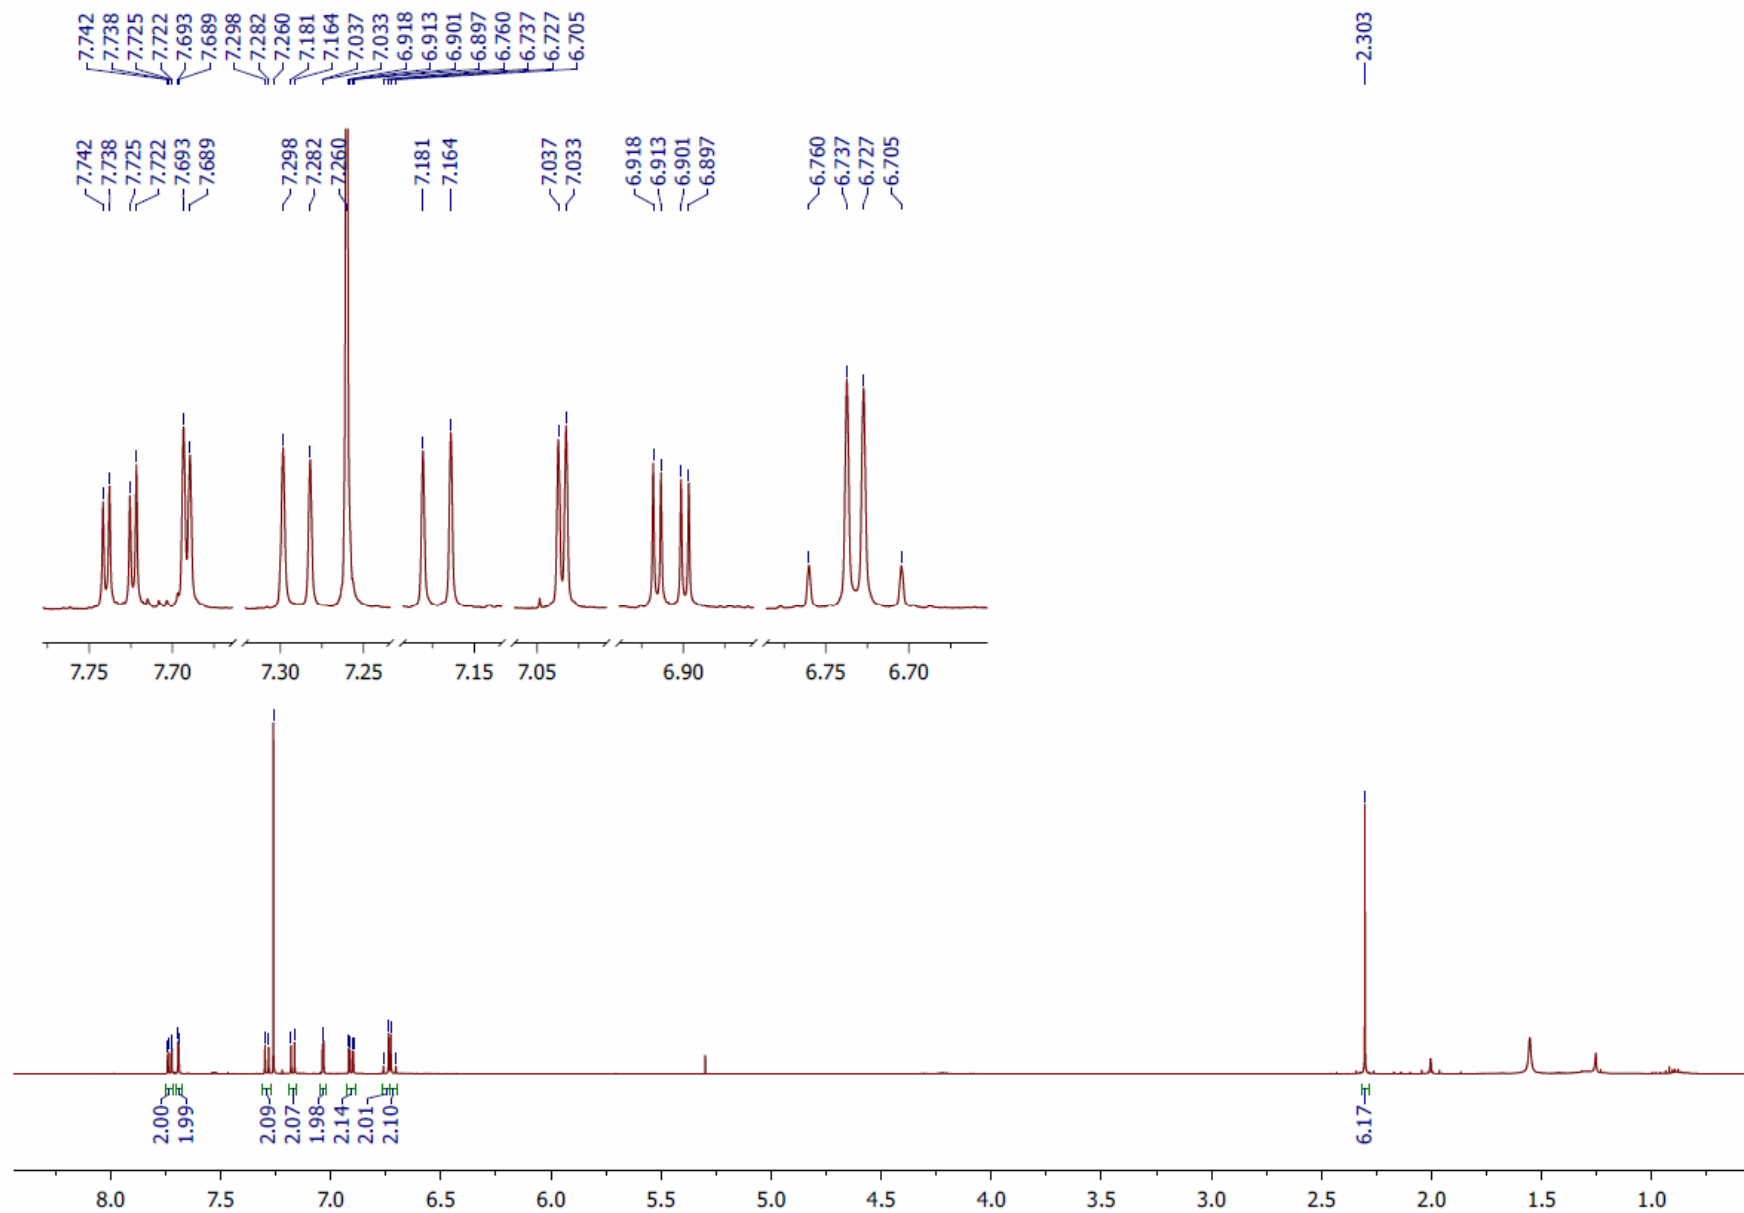

$^{13}\text{C}$  NMR of compound (2g)

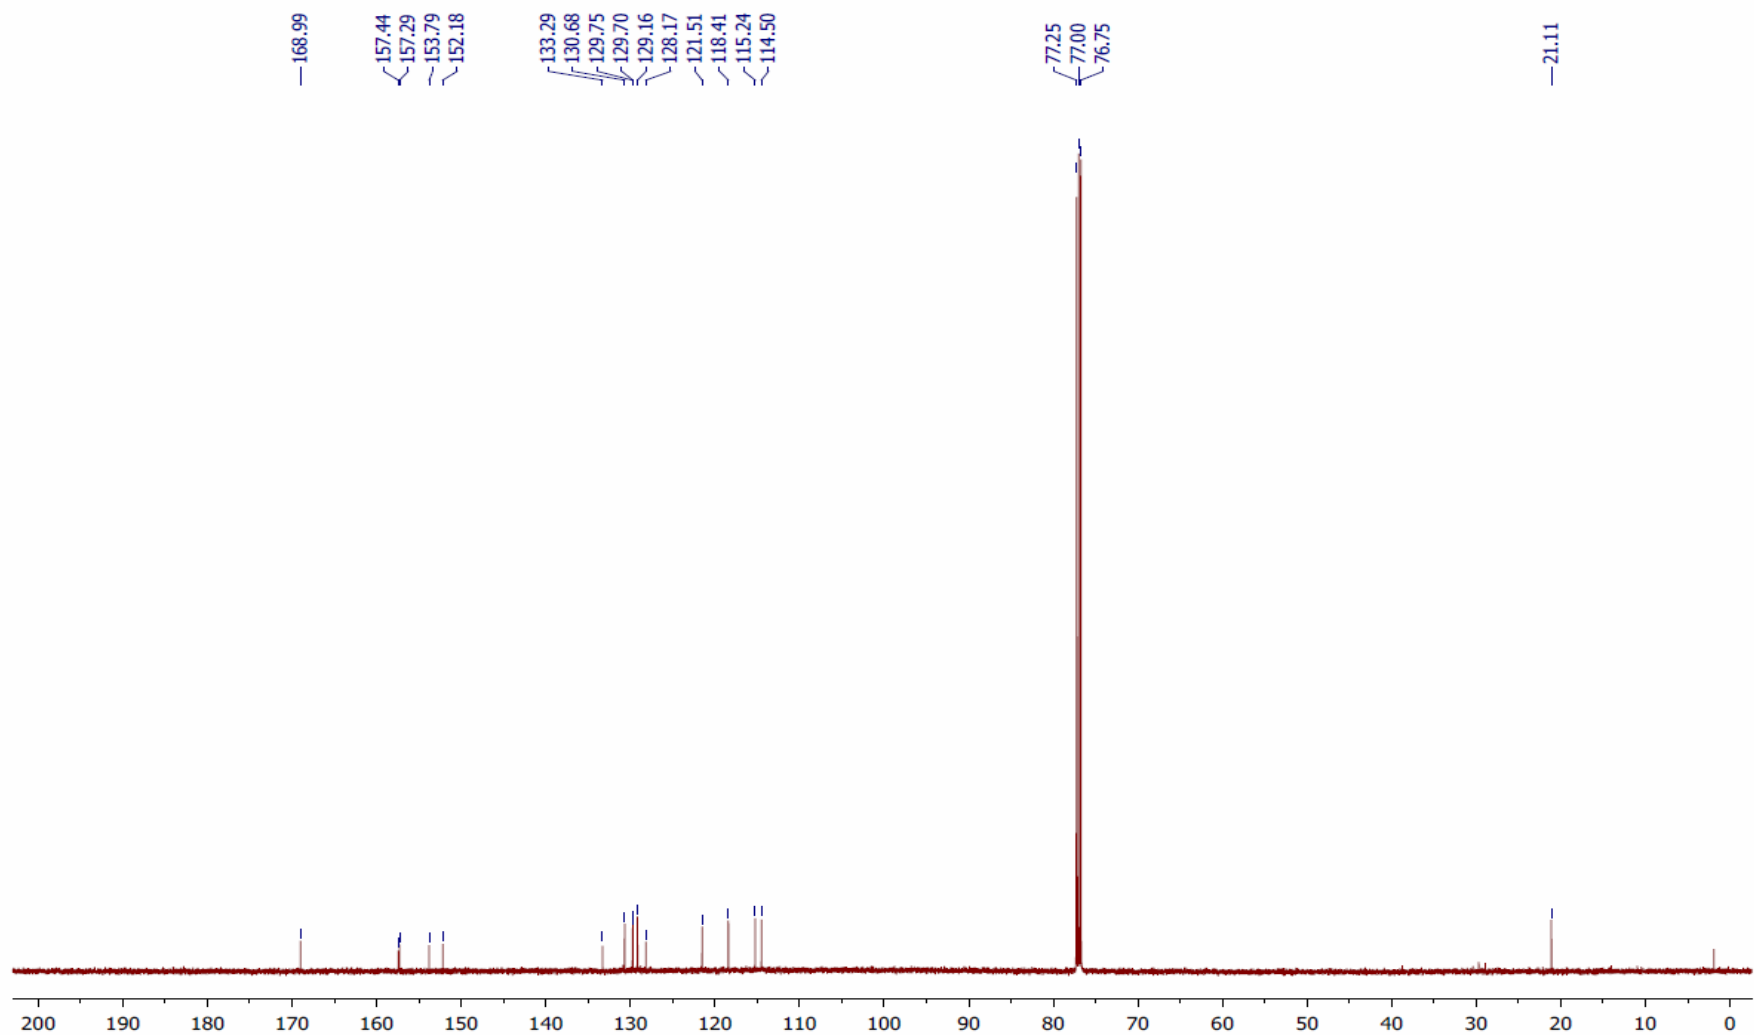

**<sup>1</sup>H NMR of compound (2h):**

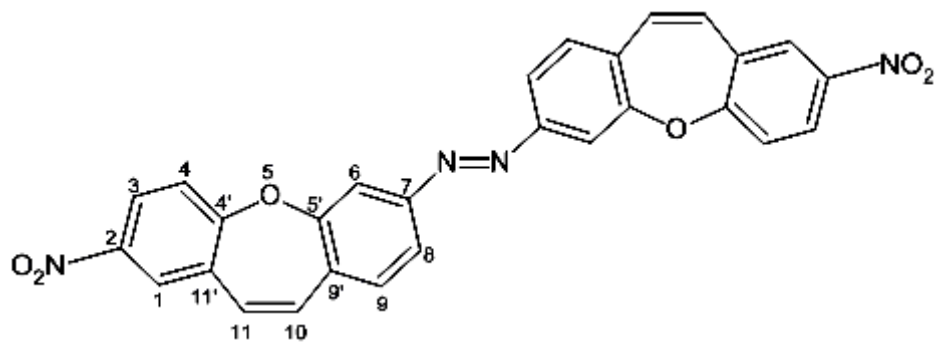



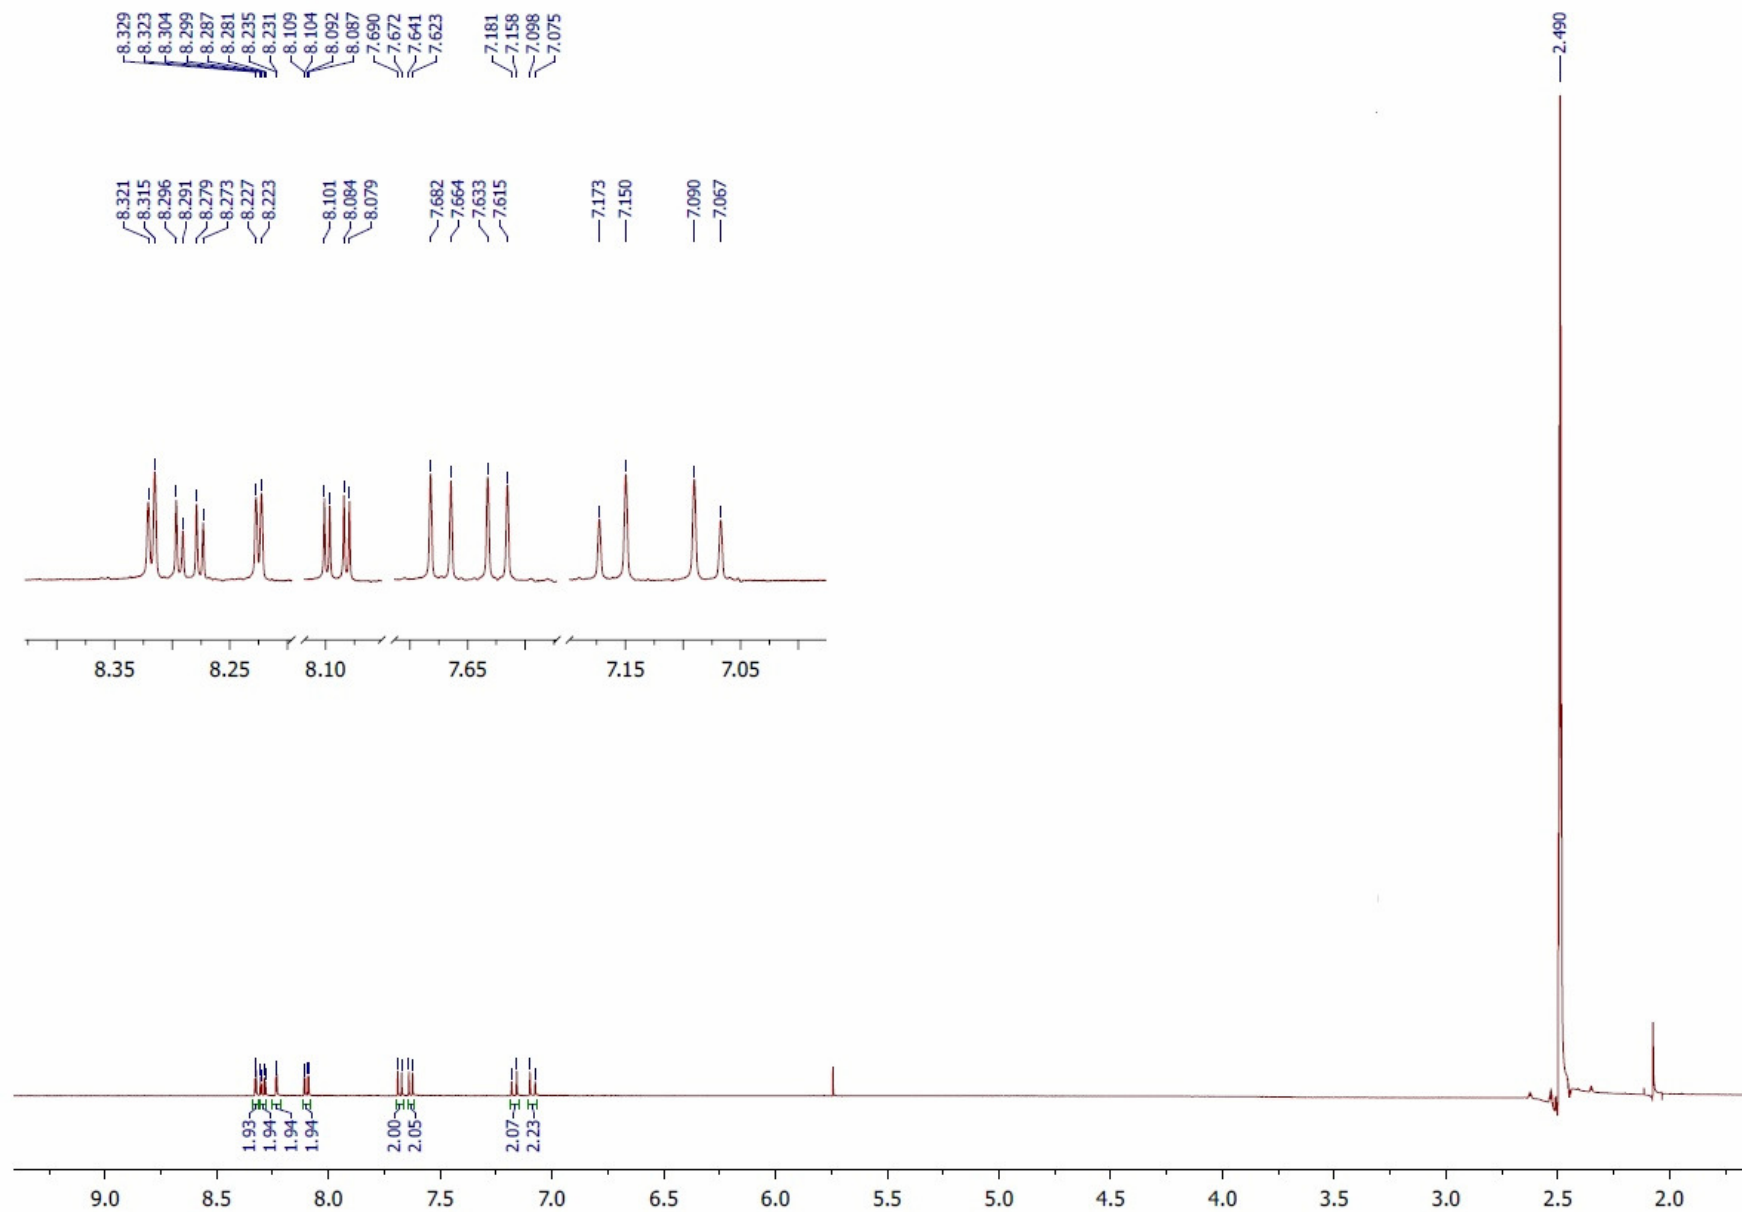

**$^{13}\text{C}$  NMR of compound (2h):**

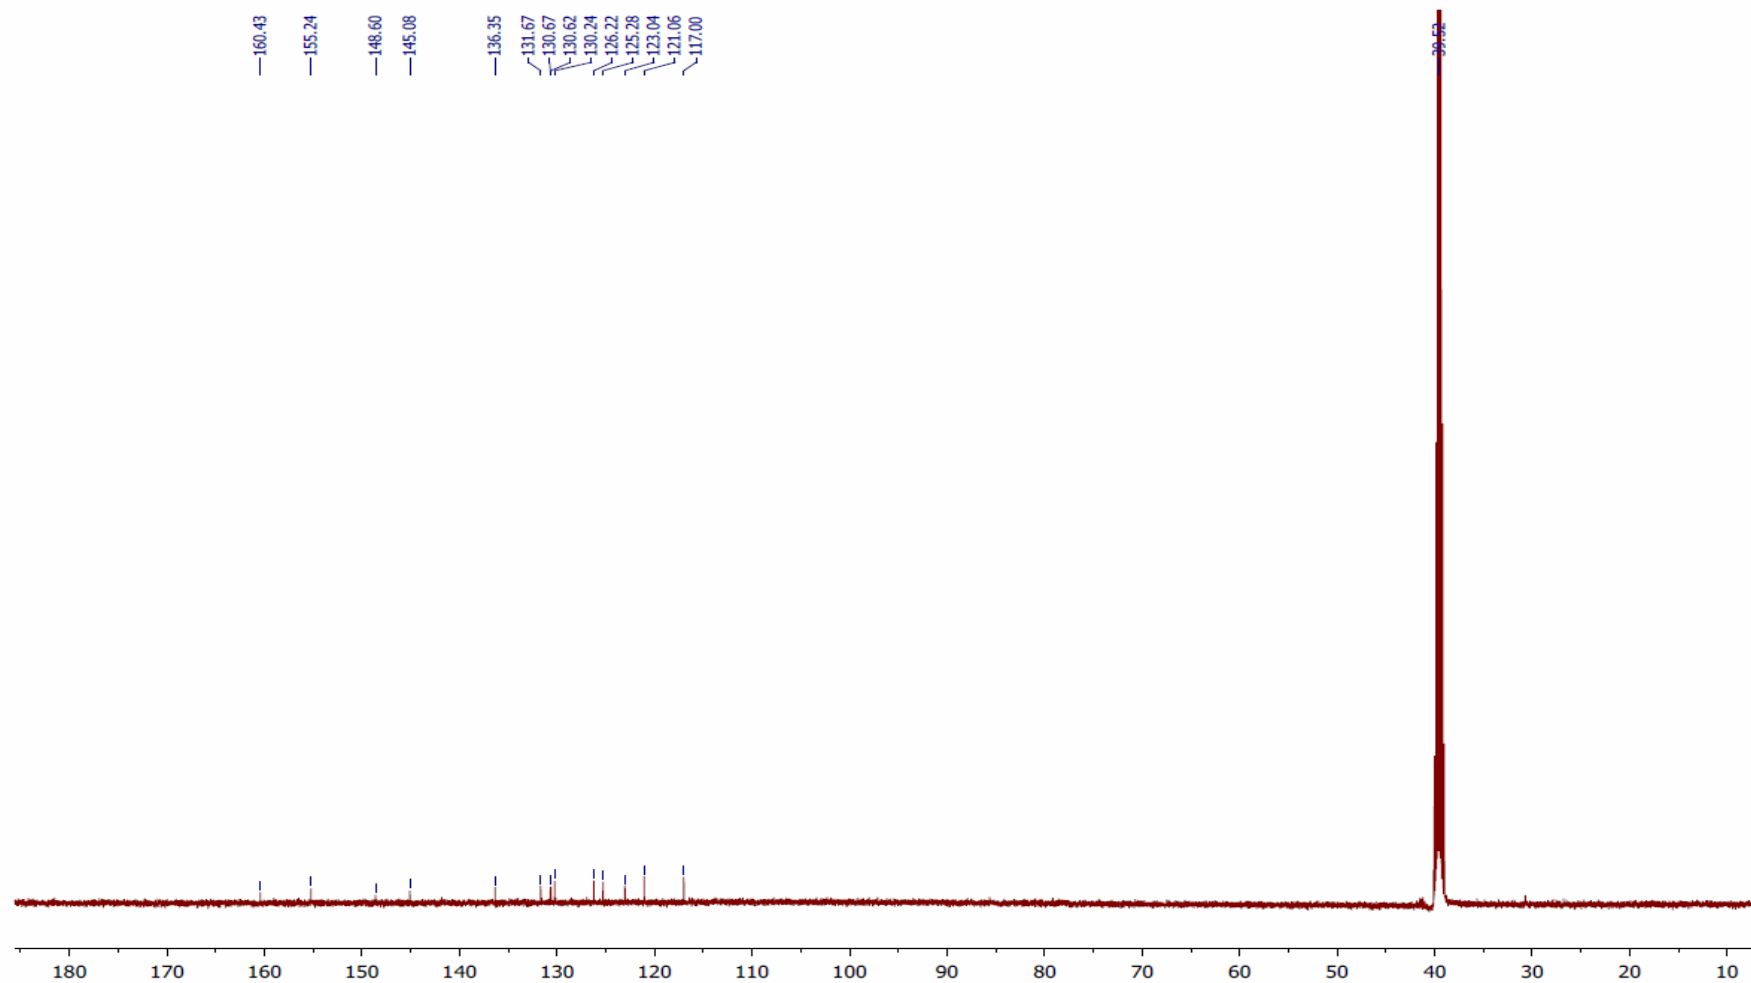

**Copies of  $^1\text{H}$  NMR and  $^{13}\text{C}$  NMR spectra of (4c-e)**

**4a:**

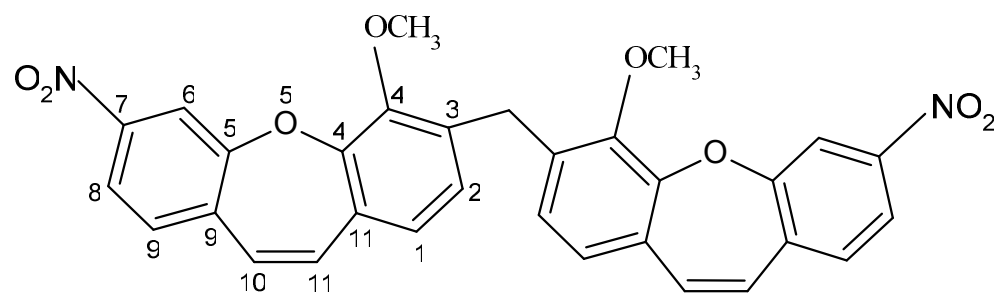

Characterization and spectra can be found in P. Tobiasz, M. Poterała, E. Jaśkowska, H. Krawczyk, *RSC Adv.*, 2018, 8, 30678-30682

**$^1\text{H}$  NMR of compound (4c4):**

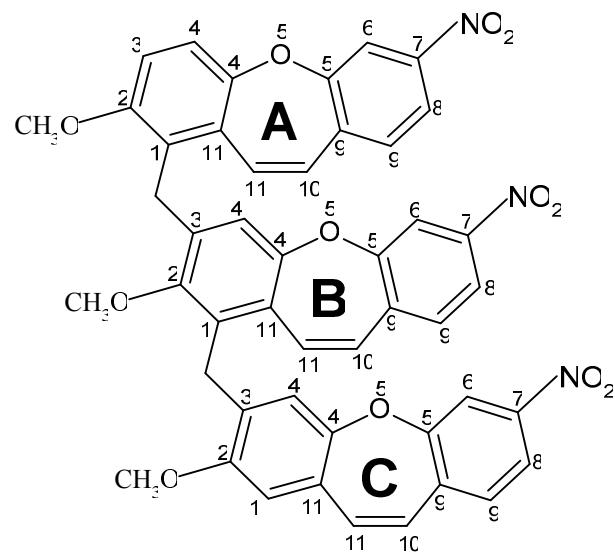

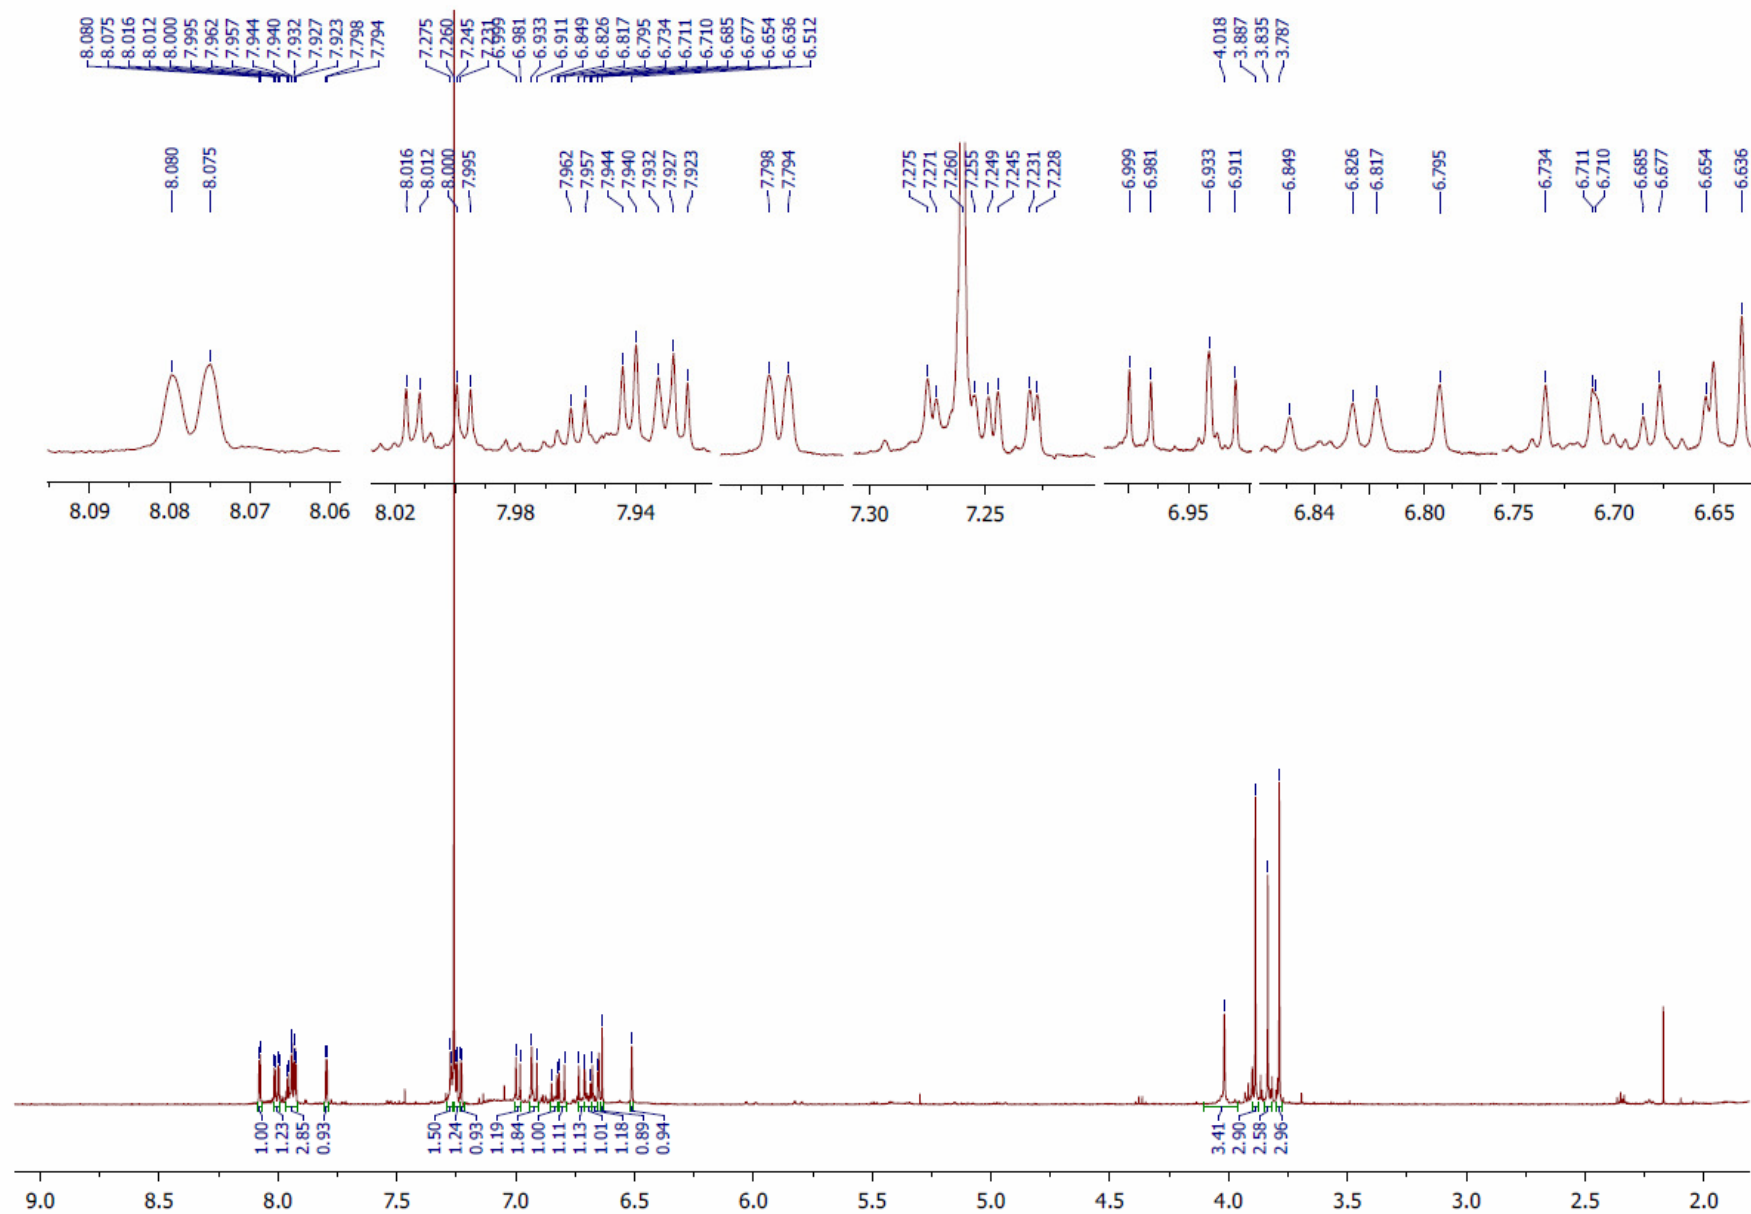

**$^{13}\text{C}$  NMR of compound (4c4):**

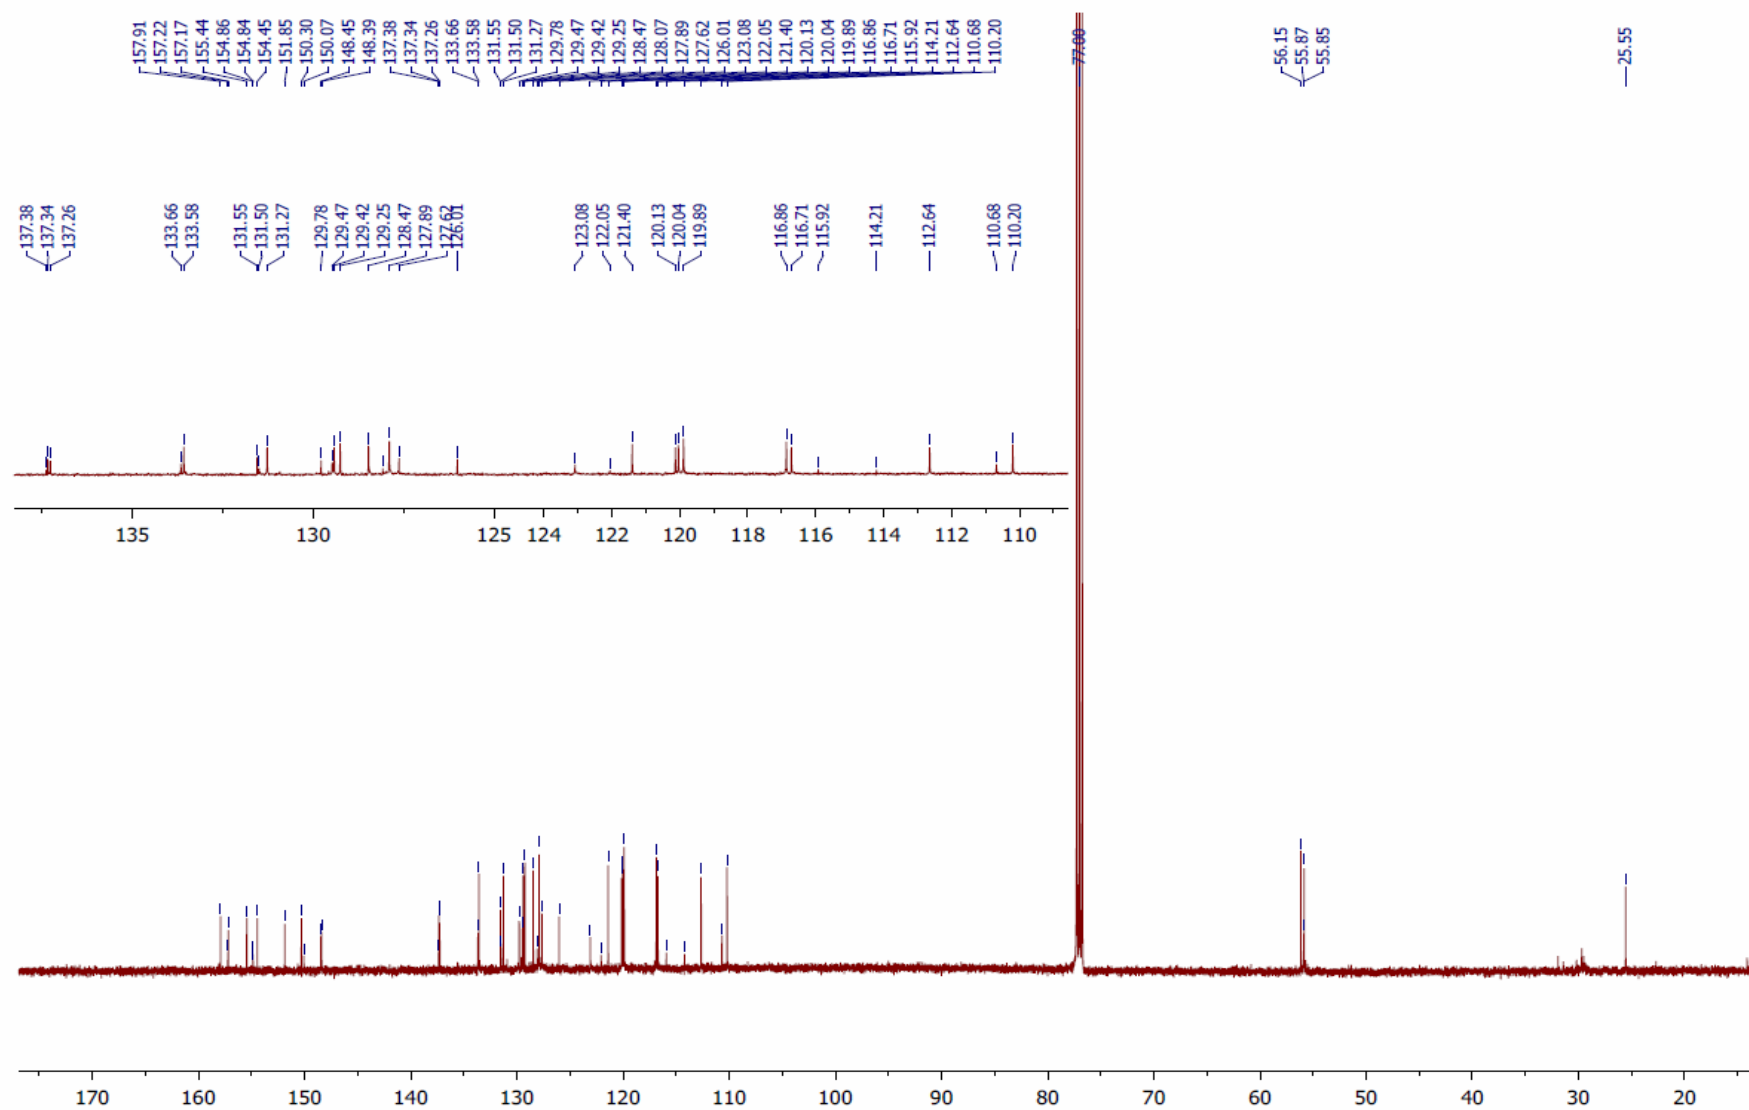

**$^1\text{H}$  NMR of compound (4d):**

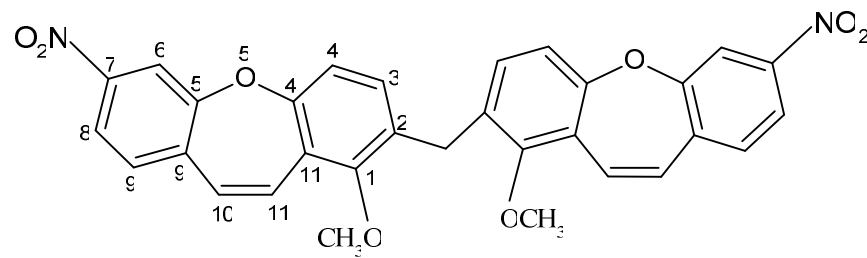

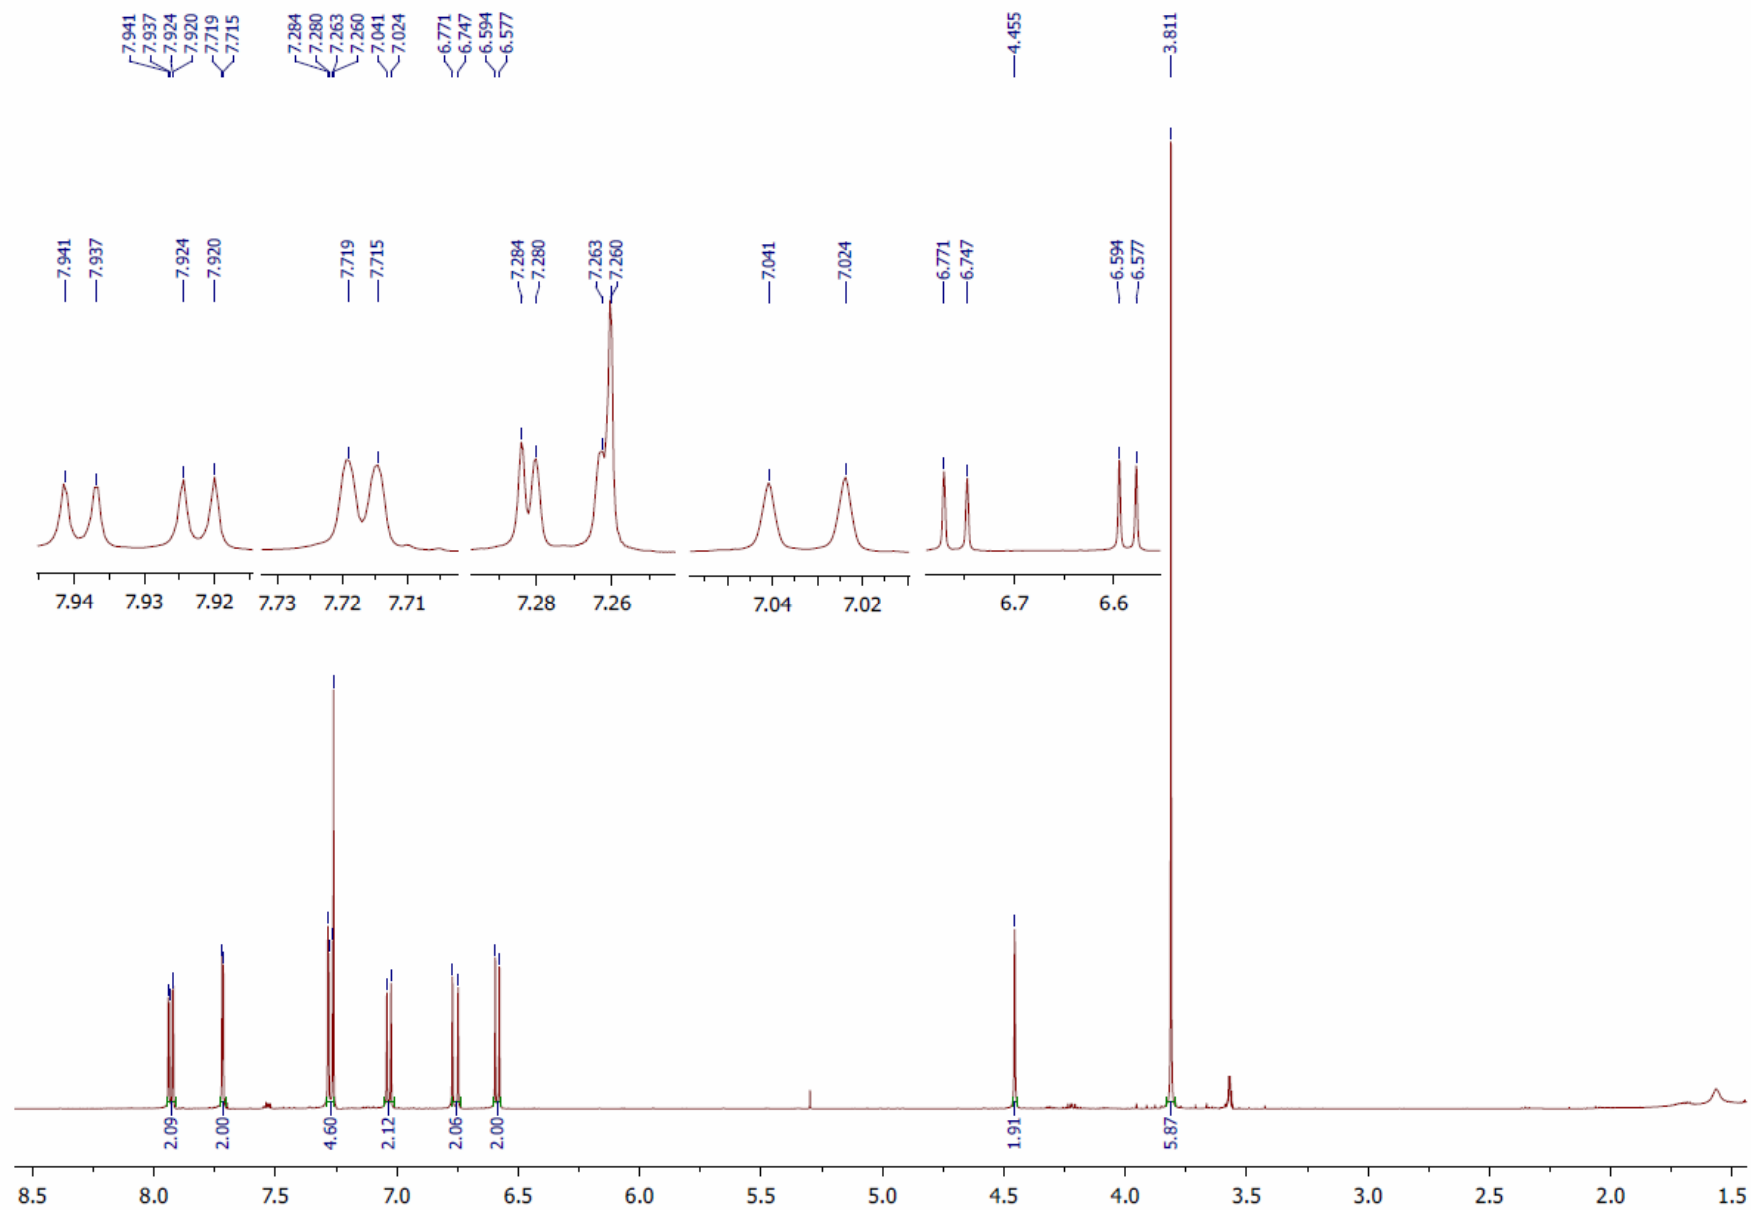



**$^{13}\text{C}$  NMR of compound (4d):**

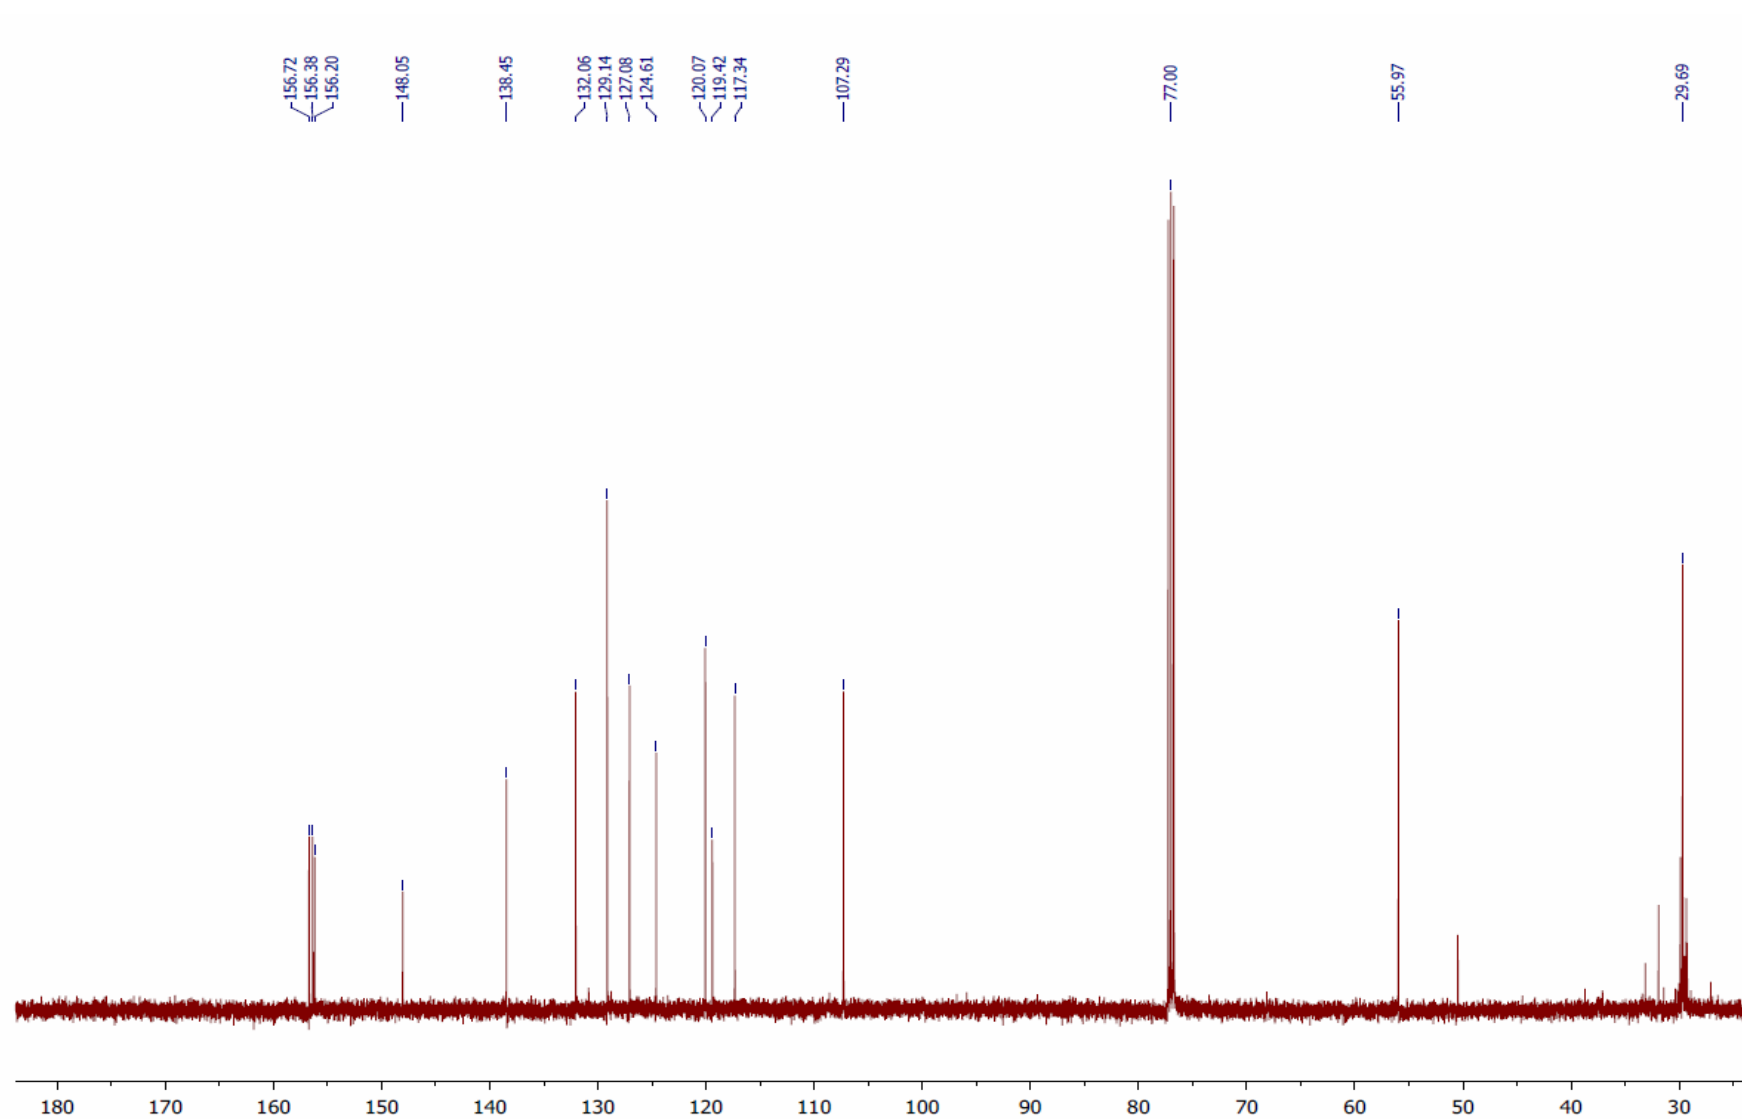

<sup>1</sup>H NMR of (4e) mixture:

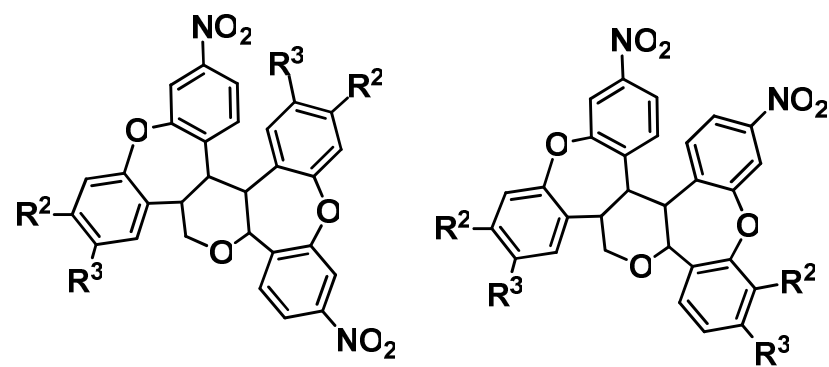

4e

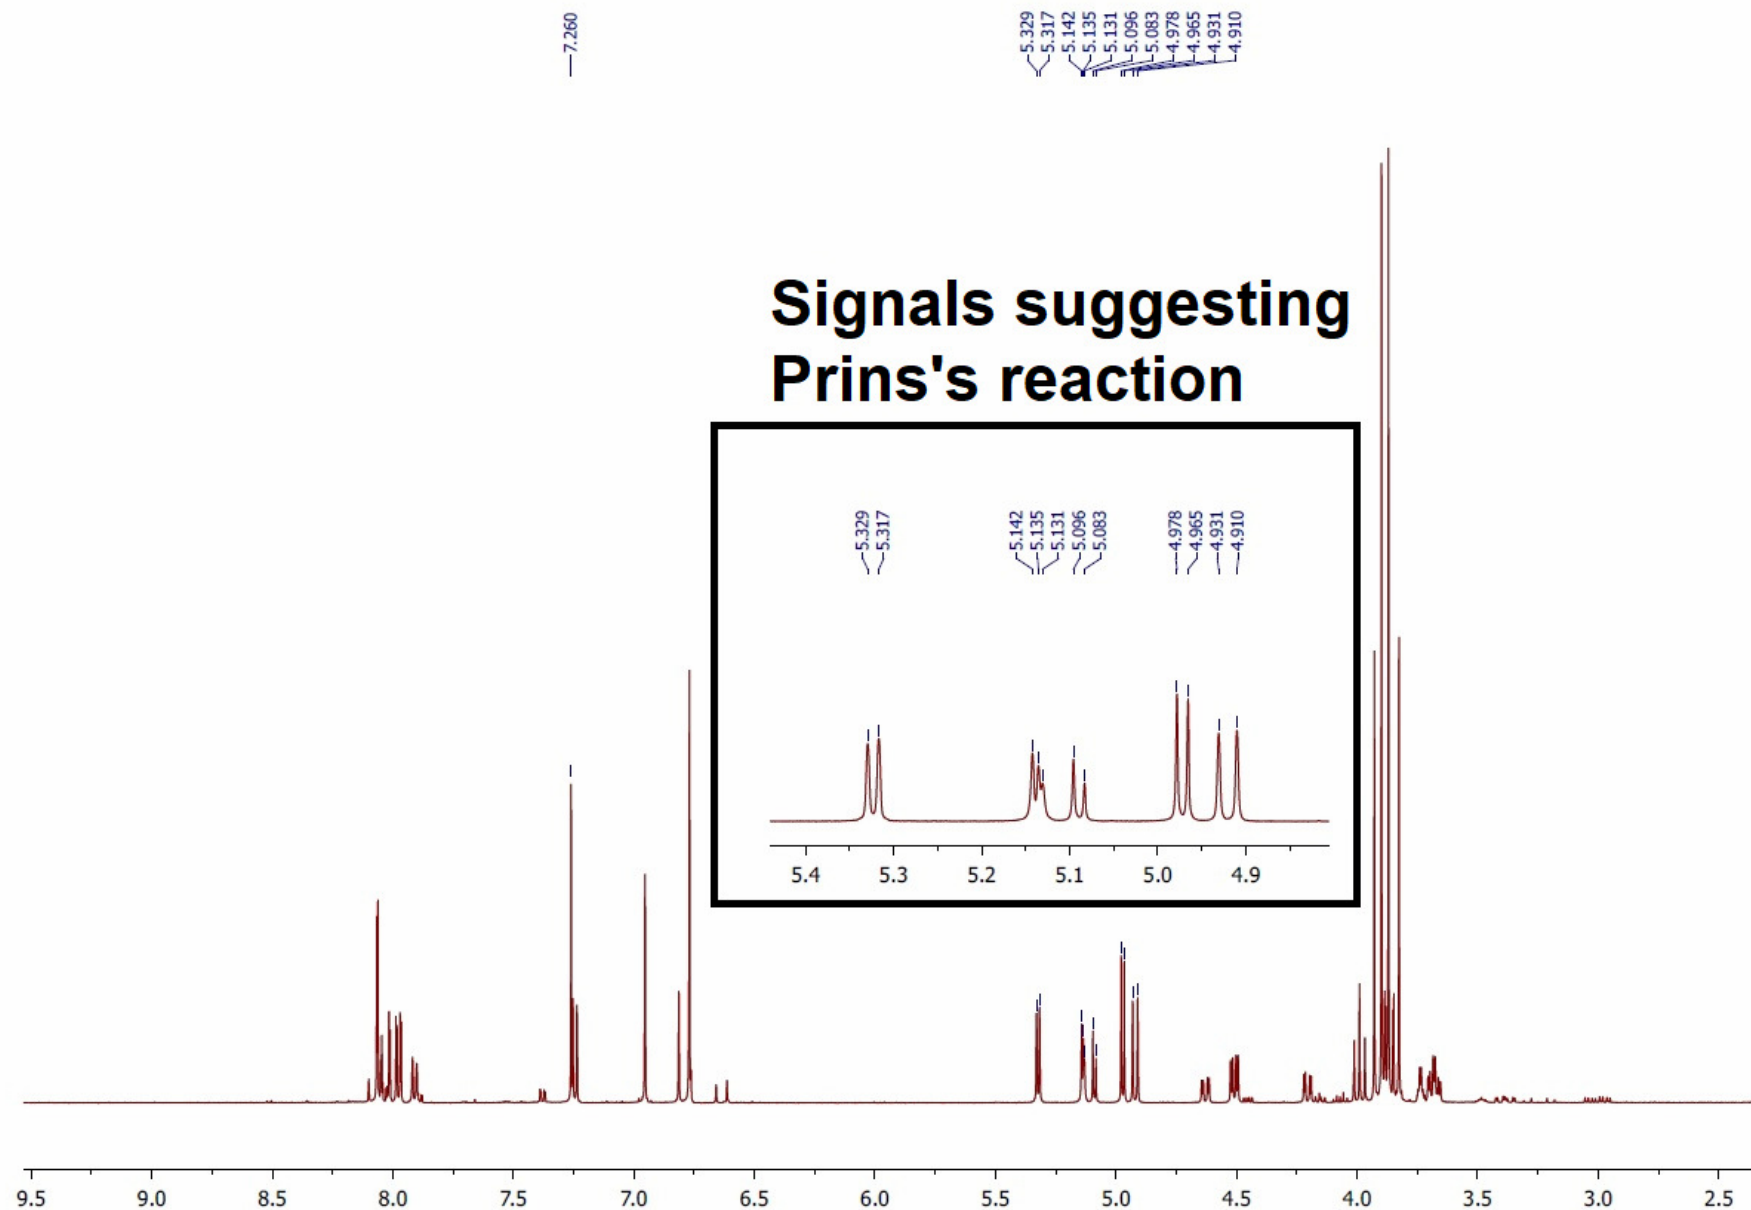

Copies of  $^1\text{H}$  NMR and  $^{13}\text{C}$  NMR spectra of (5a-f)

**5a:**

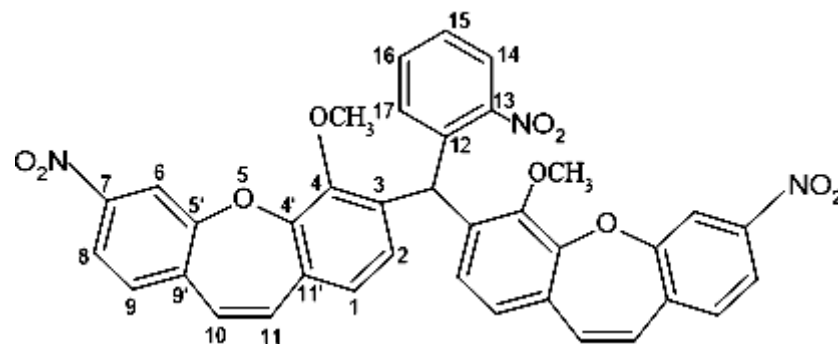

**$^1\text{H}$  NMR of compound (5a):** (500 MHz,  $\text{CDCl}_3$ , 298 K):  $\delta$  (ppm): 8.19 (2H, d,  $J_{\text{H}_6,\text{H}_8} = 2.5$  Hz,  $\text{H}_6$ ), 8.00 (1H, dd,  $J_{\text{H}_{14},\text{H}_{15}} = 8.5$  Hz,  $J_{\text{H}_{14},\text{H}_{16}} = 2$  Hz,  $\text{H}_{14}$ ), 8.00 (2H, d,  $J_{\text{H}_8,\text{H}_9} = 8.5$  Hz,  $\text{H}_8$ ), 7.34-7.32 (1H, m,  $\text{H}_{16}$ ), 7.30 (2H, d,  $\text{H}_9$ ), 7.11 (2H, d,  $J_{\text{H}_1,\text{H}_2} = 8.5$  Hz,  $\text{H}_1$ ), 7.03 (2H, AB spin system, d,  $J_{\text{H}_{10},\text{H}_{11}} = 11.5$  Hz,  $\text{H}_{11}$ ), 6.93-6.83 (2H, m,  $\text{H}_{15}$ ,  $\text{H}_{17}$ ), 6.82 (2H, AB spin system, d,  $\text{H}_{10}$ ), 6.67 (2H, d,  $\text{H}_2$ ), 6.66 (1H, s, CH), 3.94 (6H, s,  $\text{OCH}_3$ ).

**$^{13}\text{C}$  NMR of compound (5a):** (125 MHz,  $\text{CDCl}_3$ , 298 K):  $\delta$  (ppm): 157.53 ( $\text{C}5'$ ), 151.51 ( $\text{C}4$ ), 148.56 ( $\text{C}13$ ), 147.18 ( $\text{C}7$ ), 146.10 ( $\text{C}4'$ ), 145.21 ( $\text{C}12$ ), 137.36 ( $\text{C}9'$ ), 135.40 ( $\text{C}16$ ), 133.20 ( $\text{C}17$ ), 130.31 ( $\text{C}10$ ), 129.98 ( $\text{C}11$ ), 128.84 ( $\text{C}3$ ), 128.66 ( $\text{C}11'$ ), 128.52 ( $\text{C}9$ ), 126.56 ( $\text{C}15$ ), 124.21 ( $\text{C}2$ ), 120.11 ( $\text{C}14$ ), 120.05 ( $\text{C}8$ ), 117.45 ( $\text{C}6$ ), 112.81 ( $\text{C}1$ ), 56.14 ( $\text{OCH}_3$ ), 40.78 (CH).

**HRMS** (ESI):  $m/z$  calculated for  $\text{C}_{37}\text{H}_{25}\text{N}_3\text{O}_{10}+\text{H}$  672.16127, found: 672.16127.

Light yellow powder.

**$^1\text{H}$  NMR of compound (5b):**

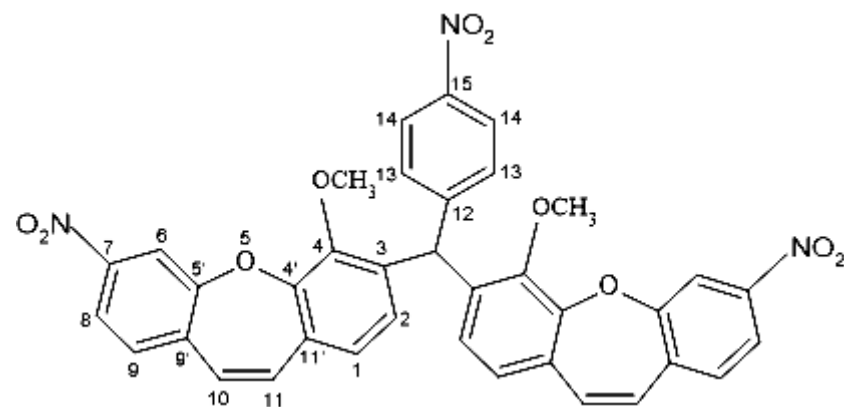

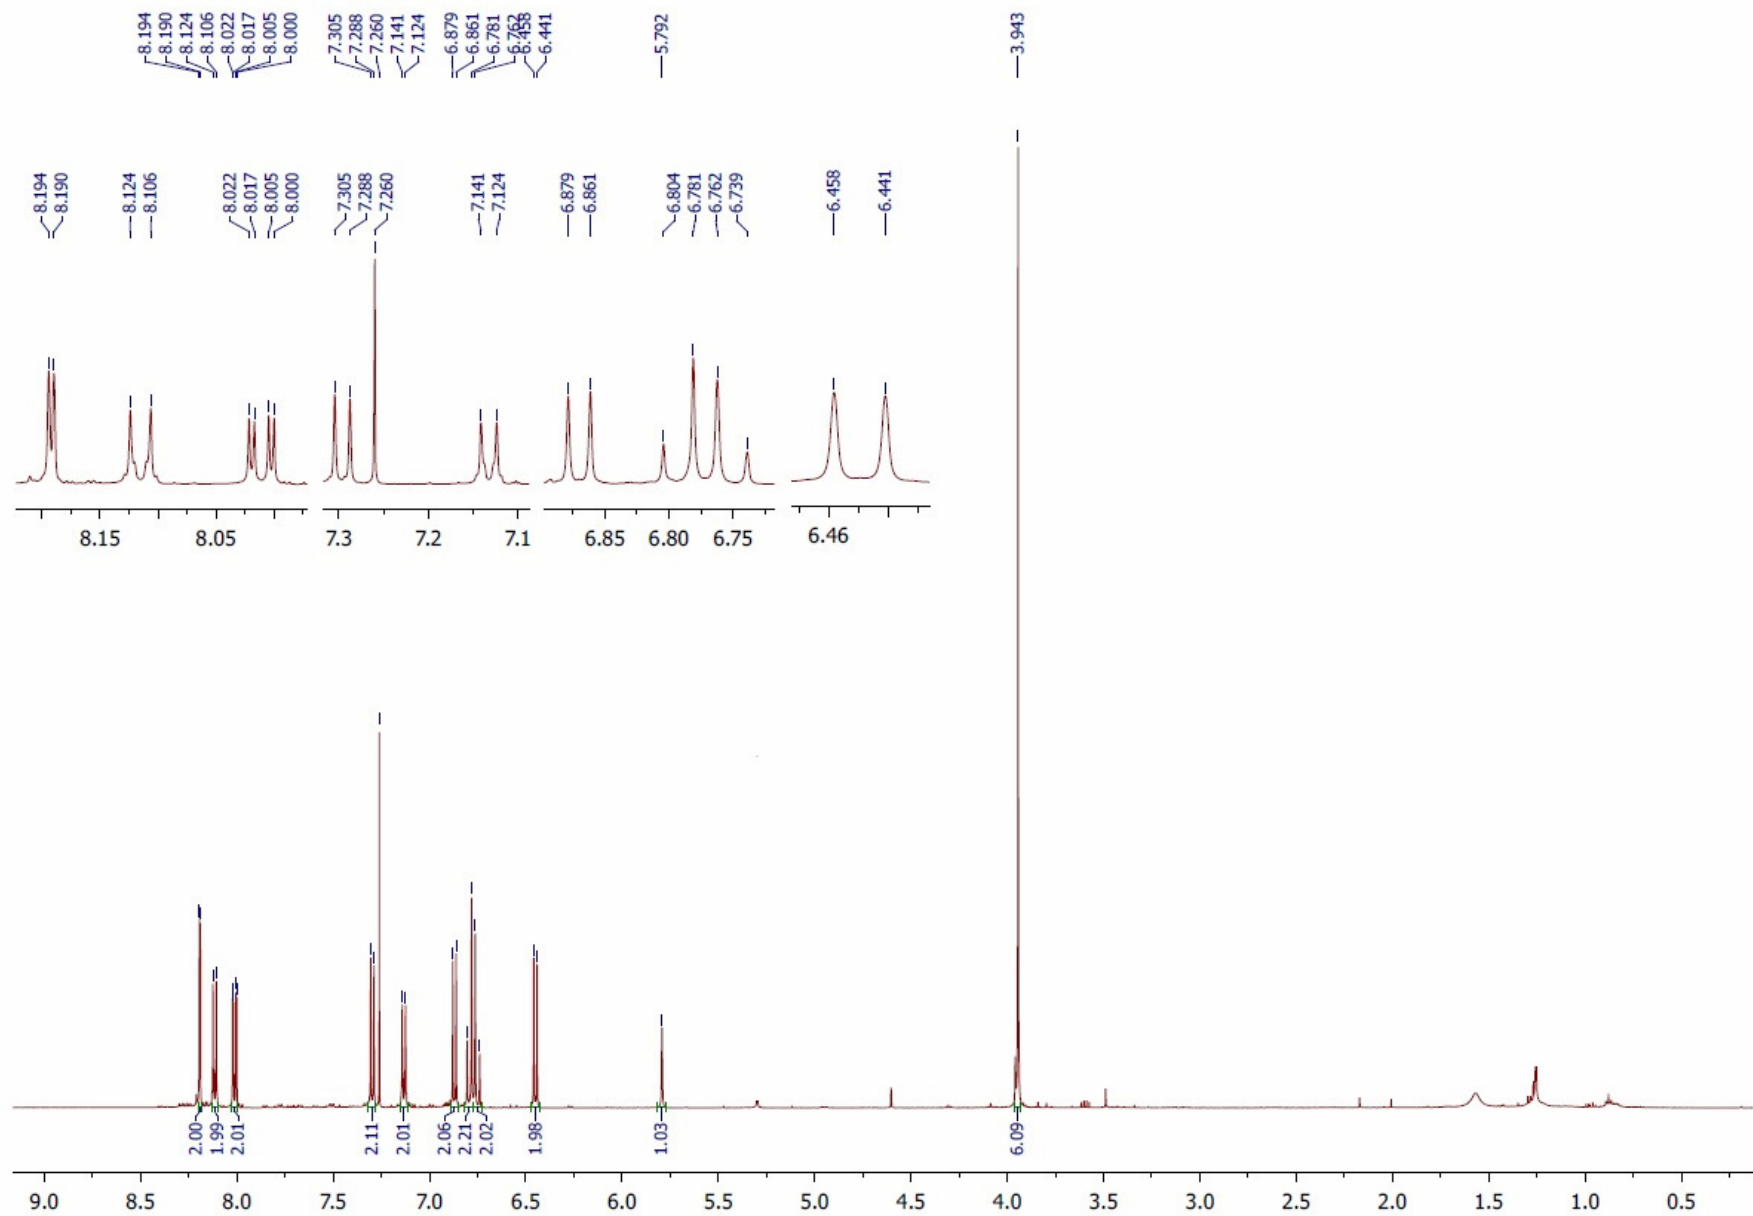

**$^{13}\text{C}$  NMR of compound (5b):**

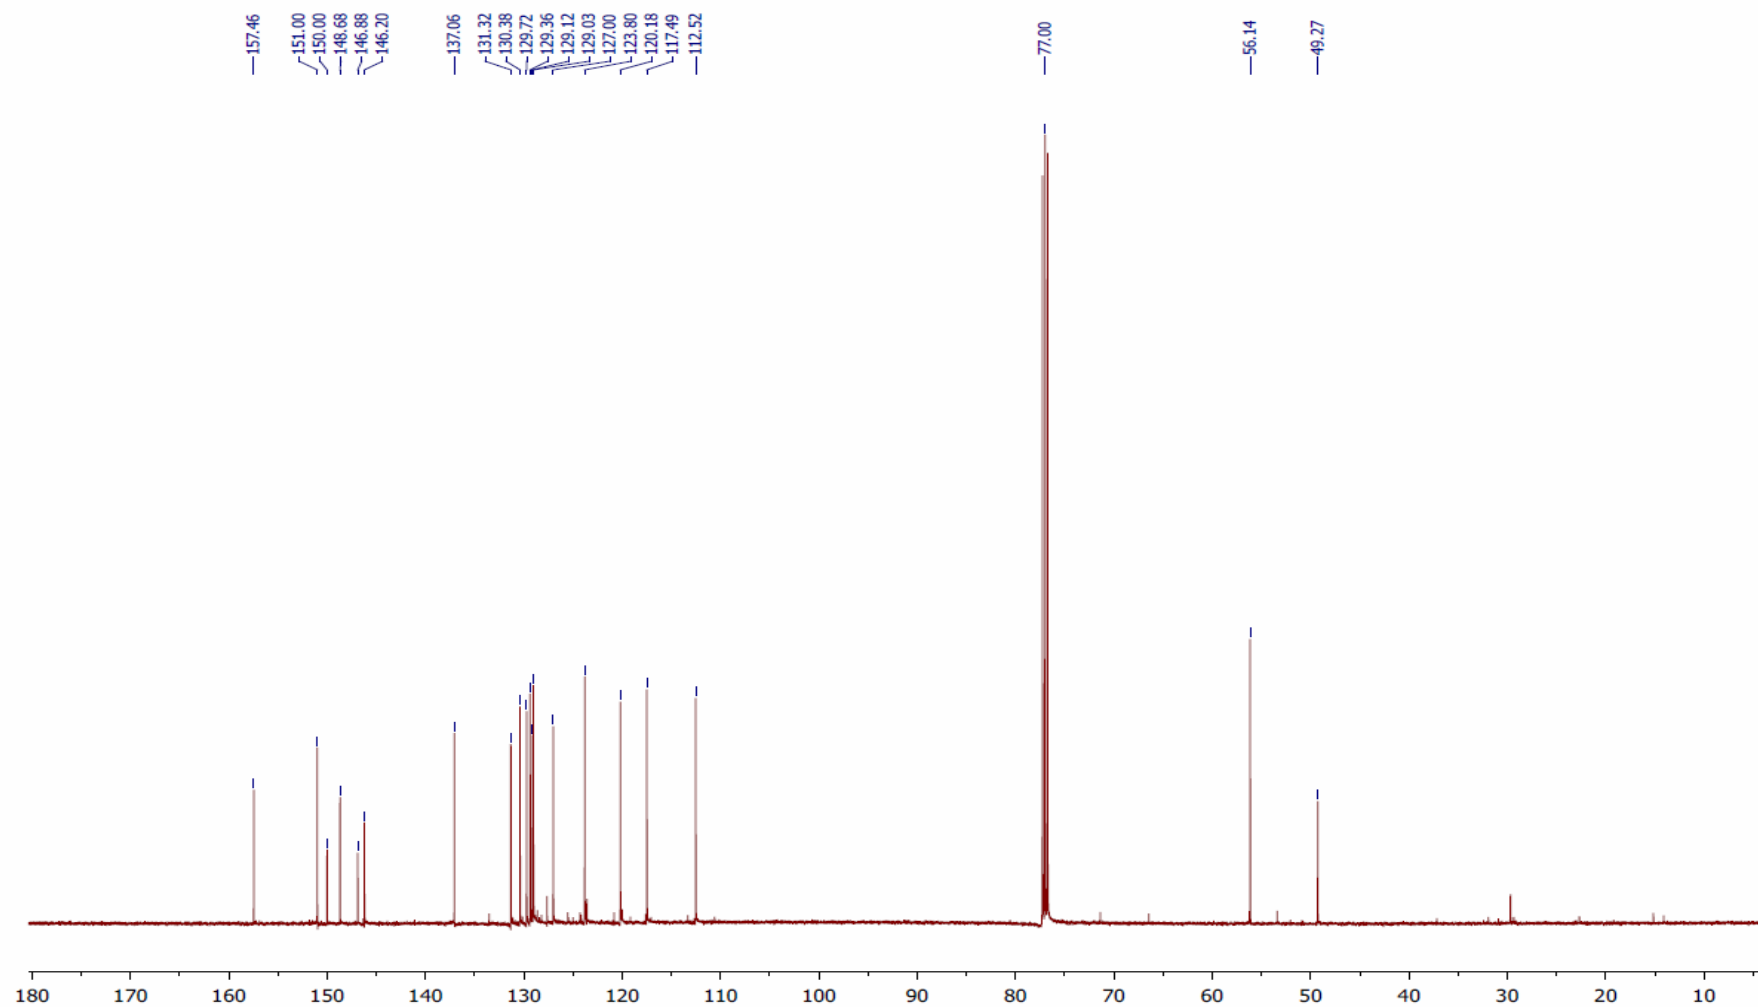

**$^1\text{H}$  NMR of compound (5c):**

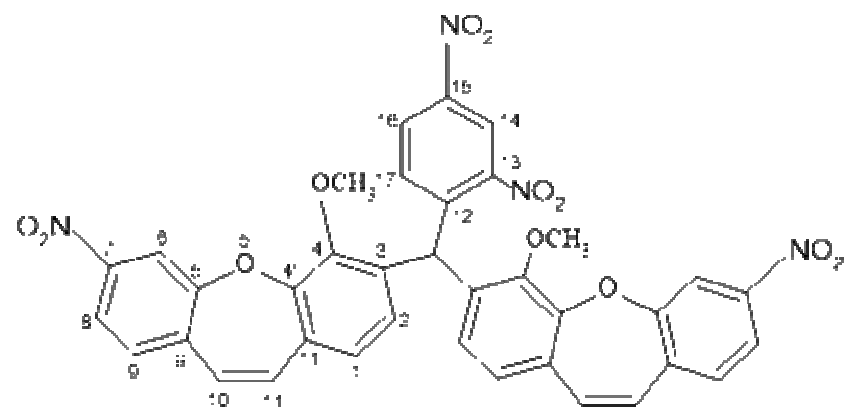



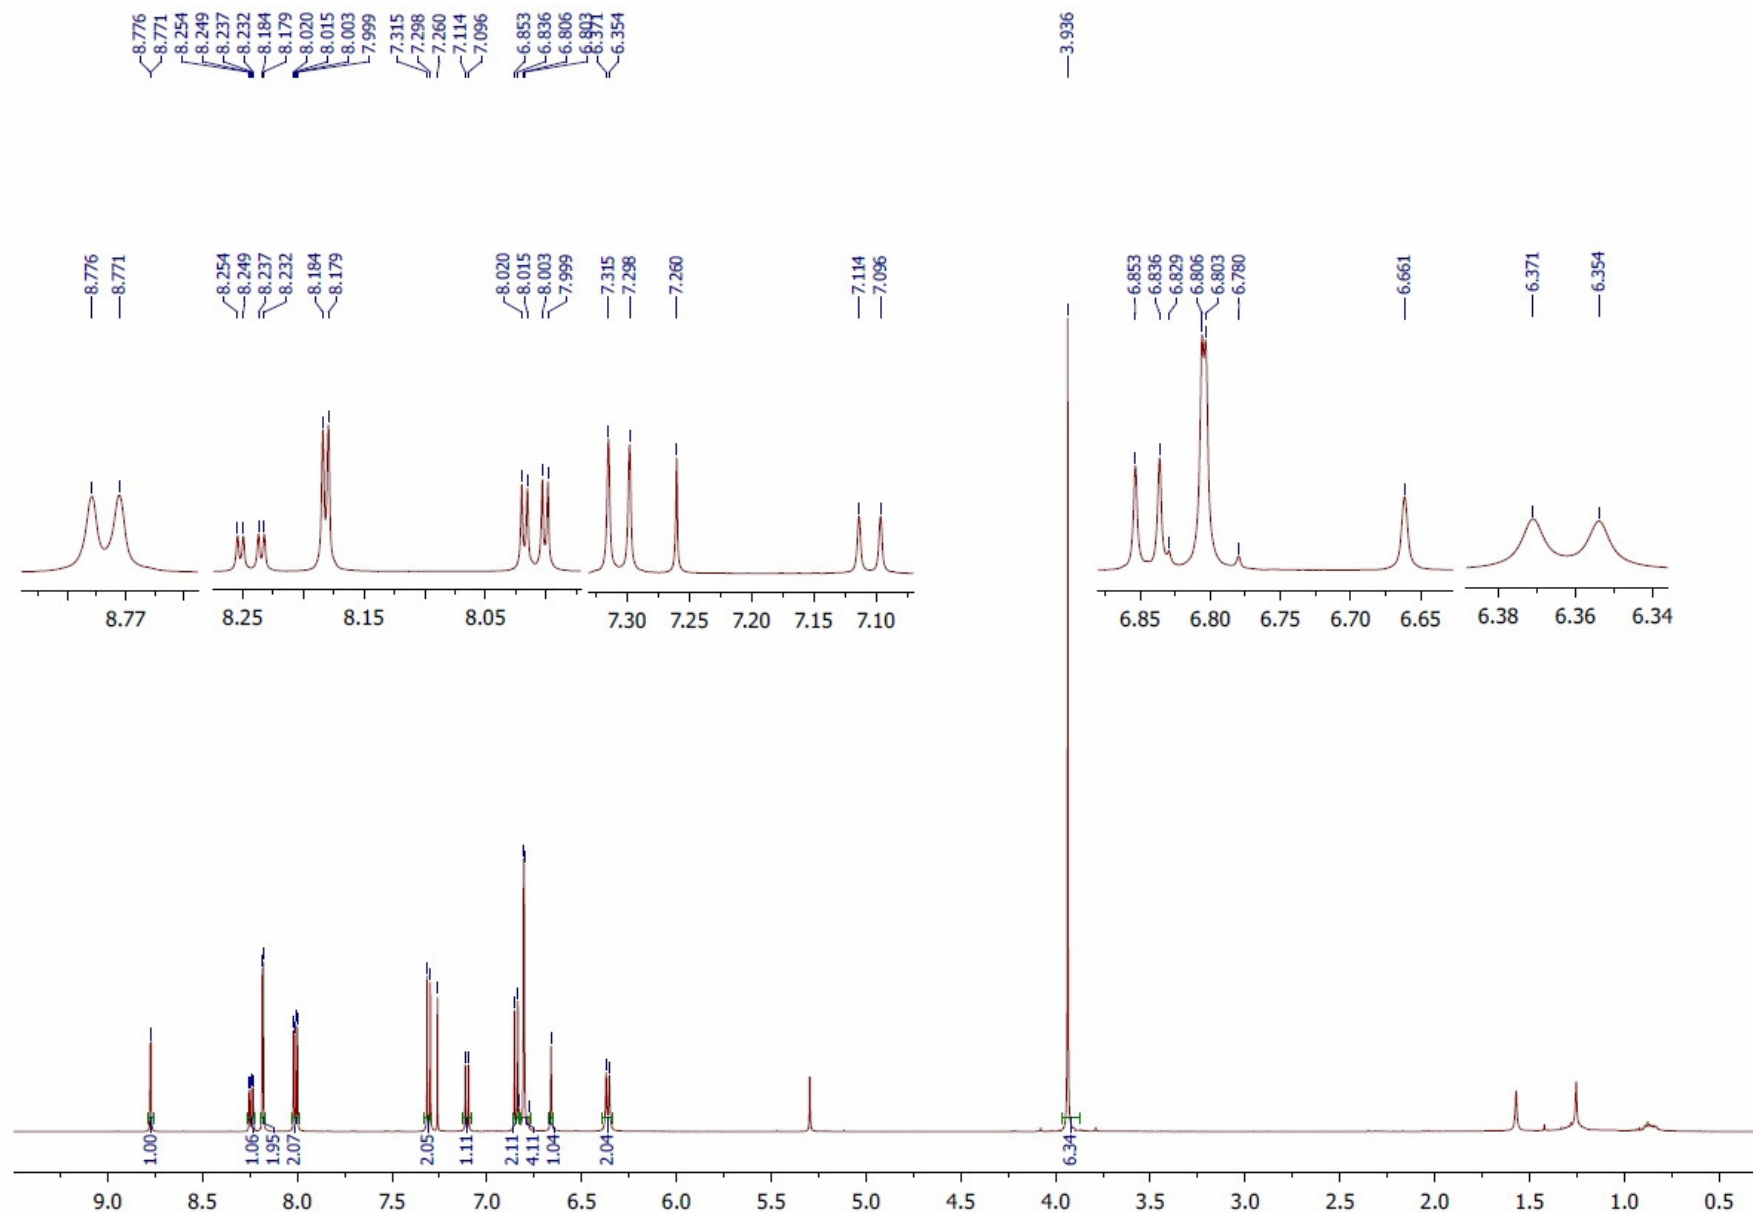

**$^{13}\text{C}$  NMR of compound (5c):**

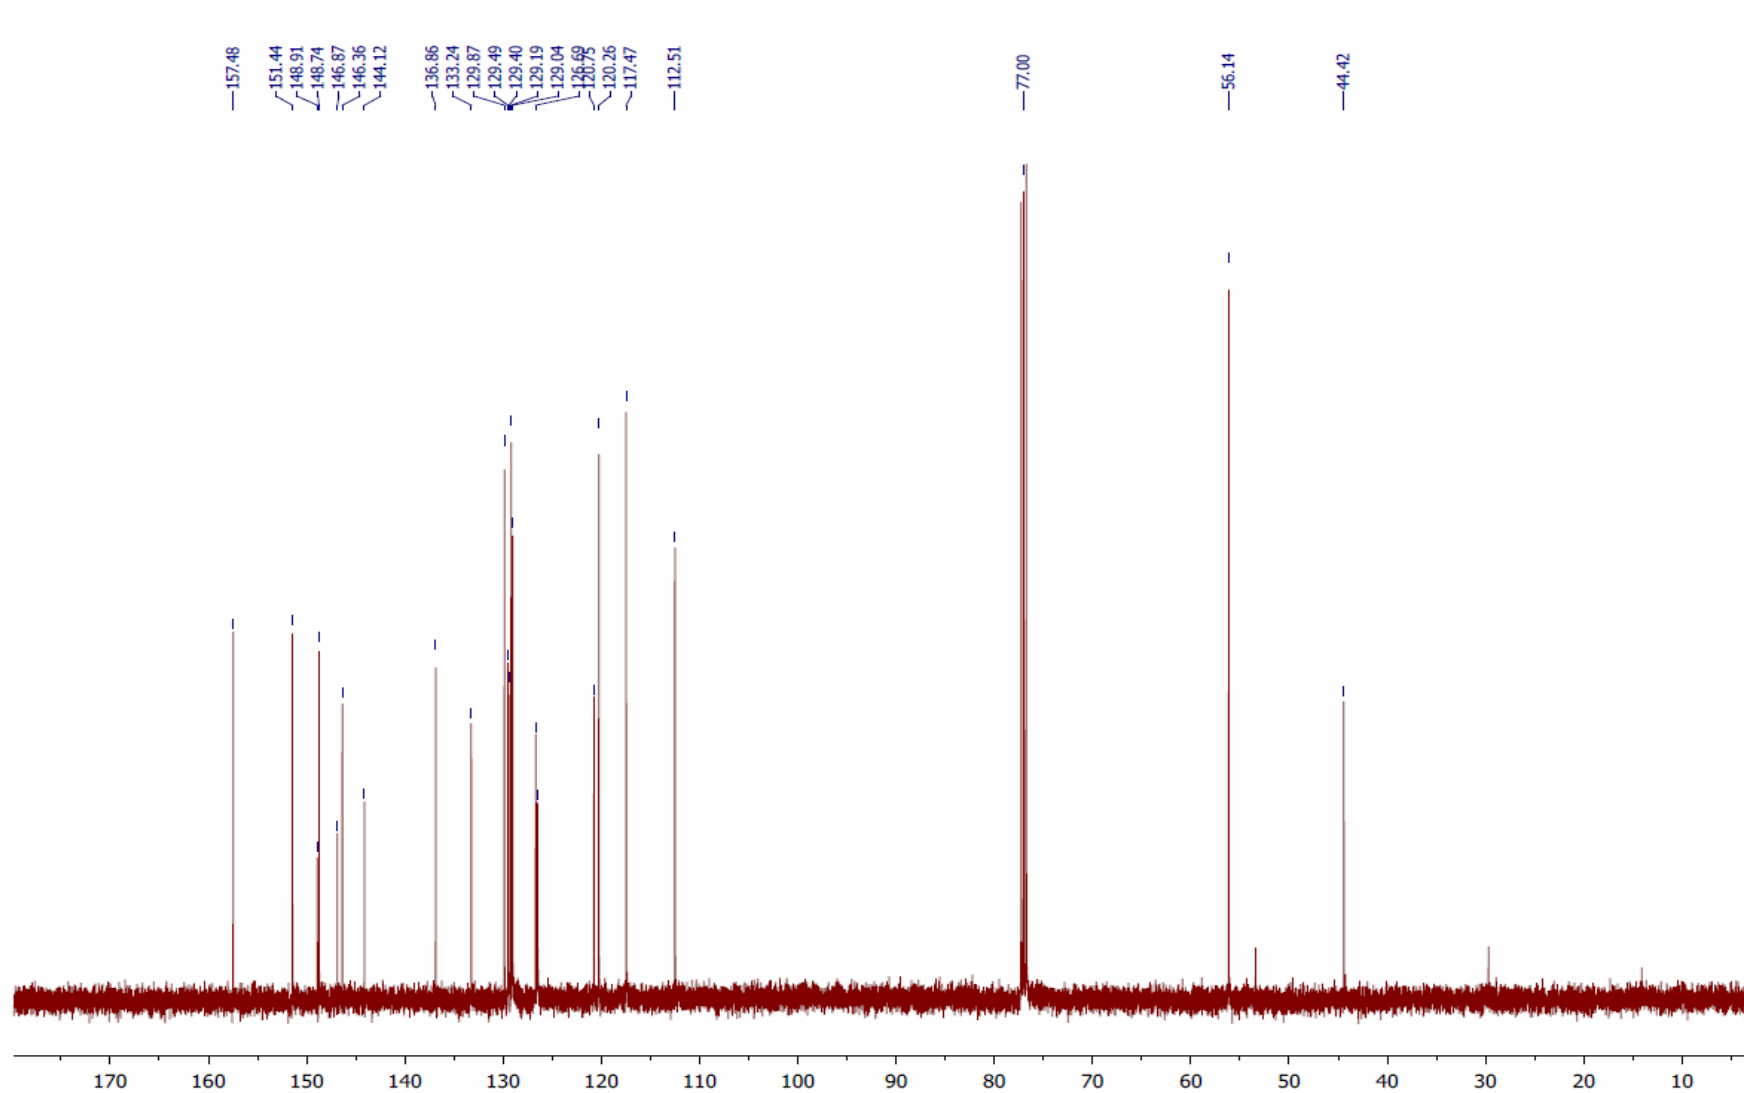

**$^1\text{H}$  NMR of compound (5d):**

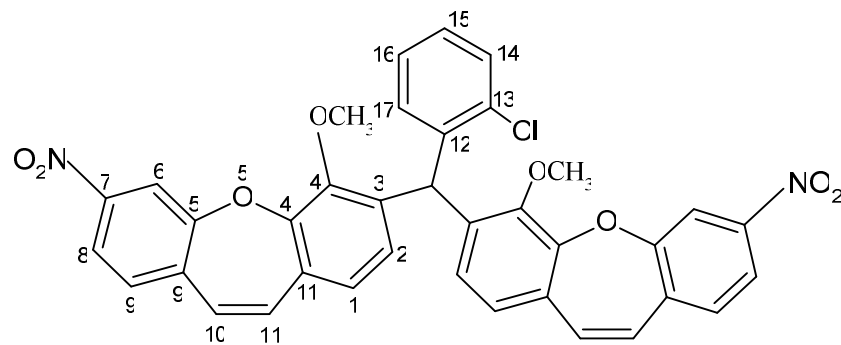

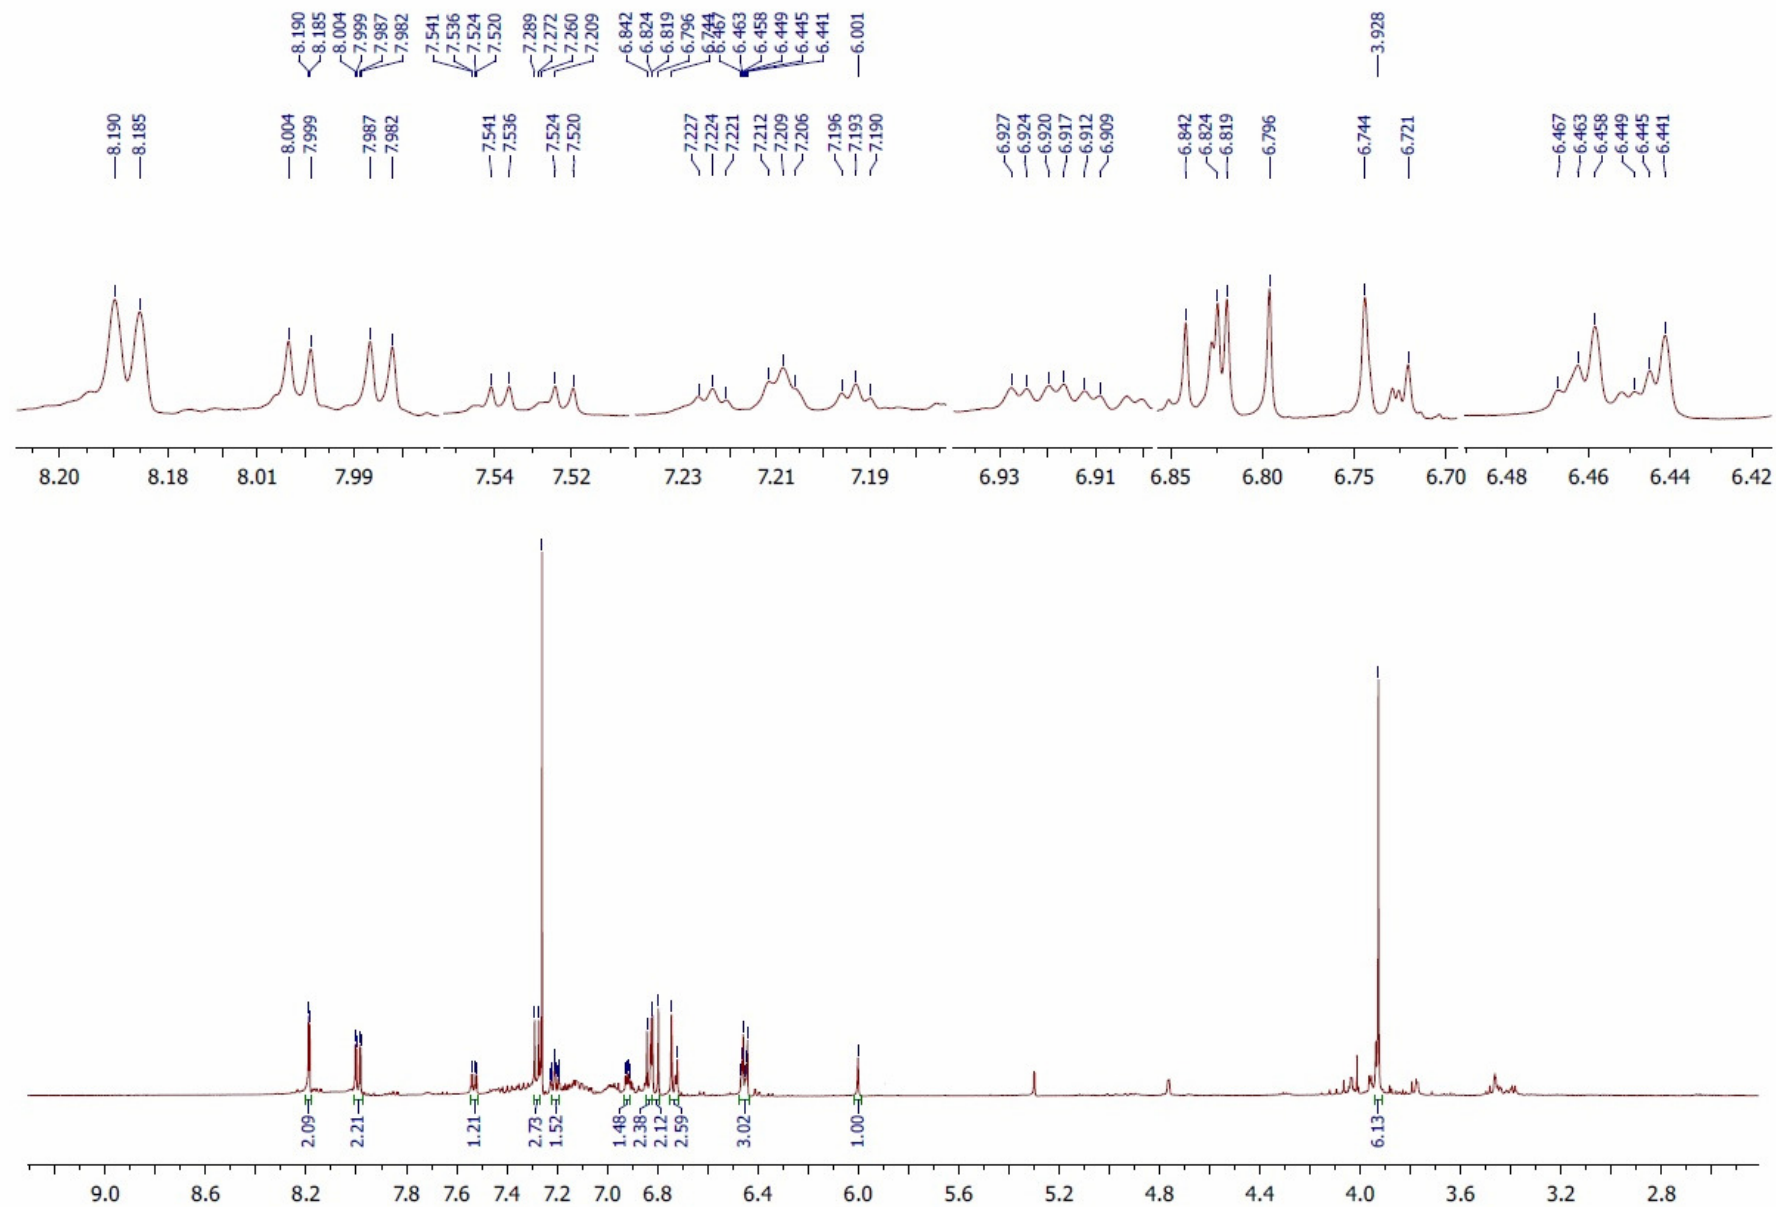

**$^{13}\text{C}$  NMR of compound (5d):**

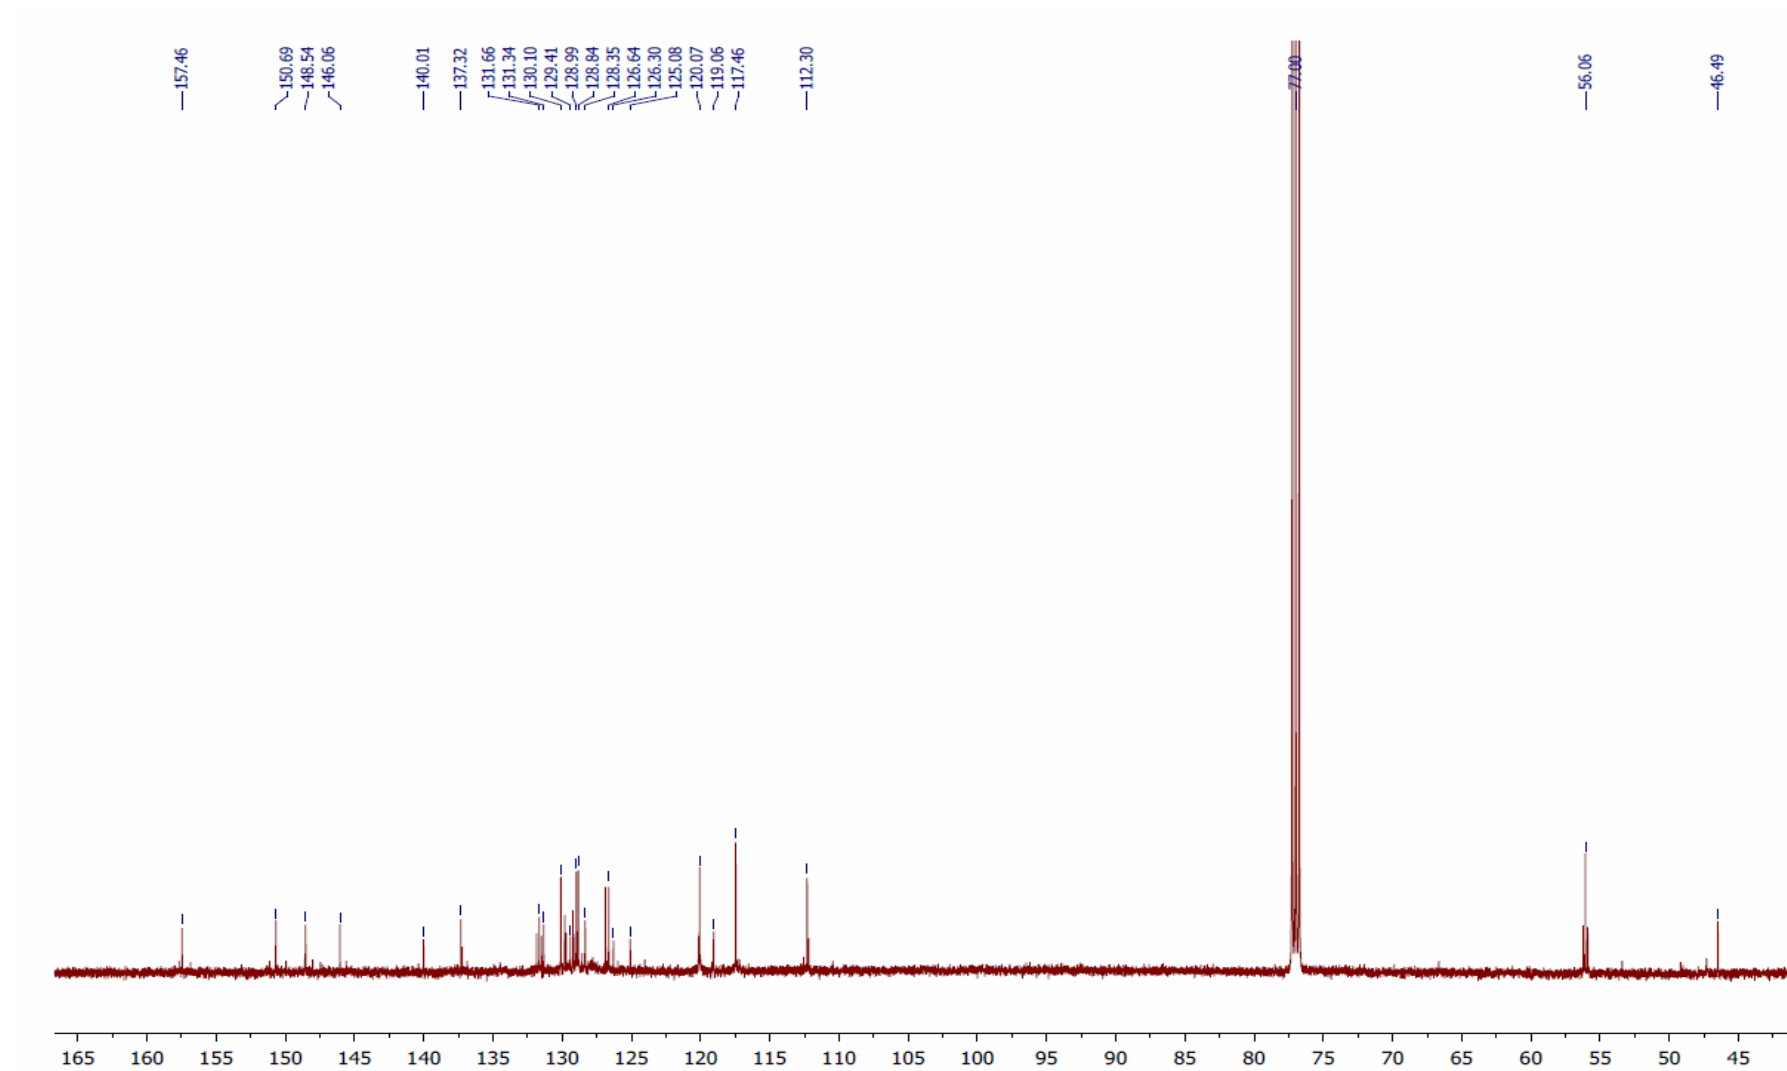

**$^1\text{H}$  NMR of compound (5e):**

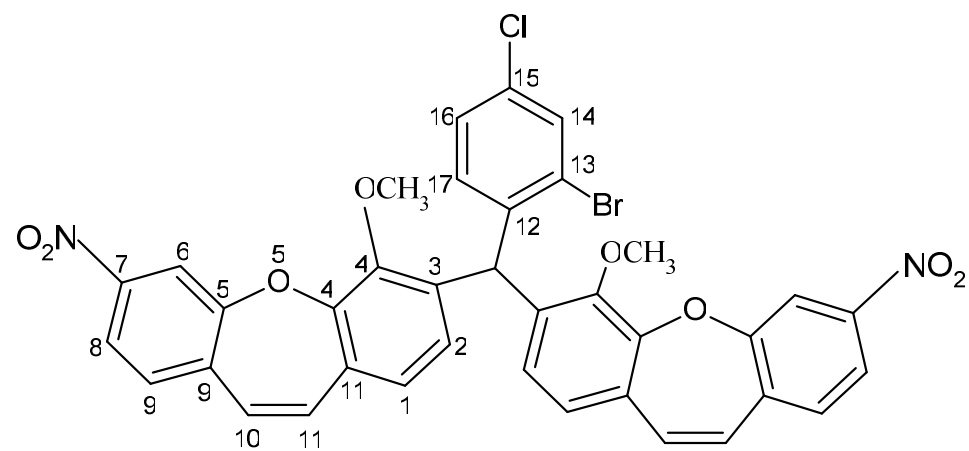

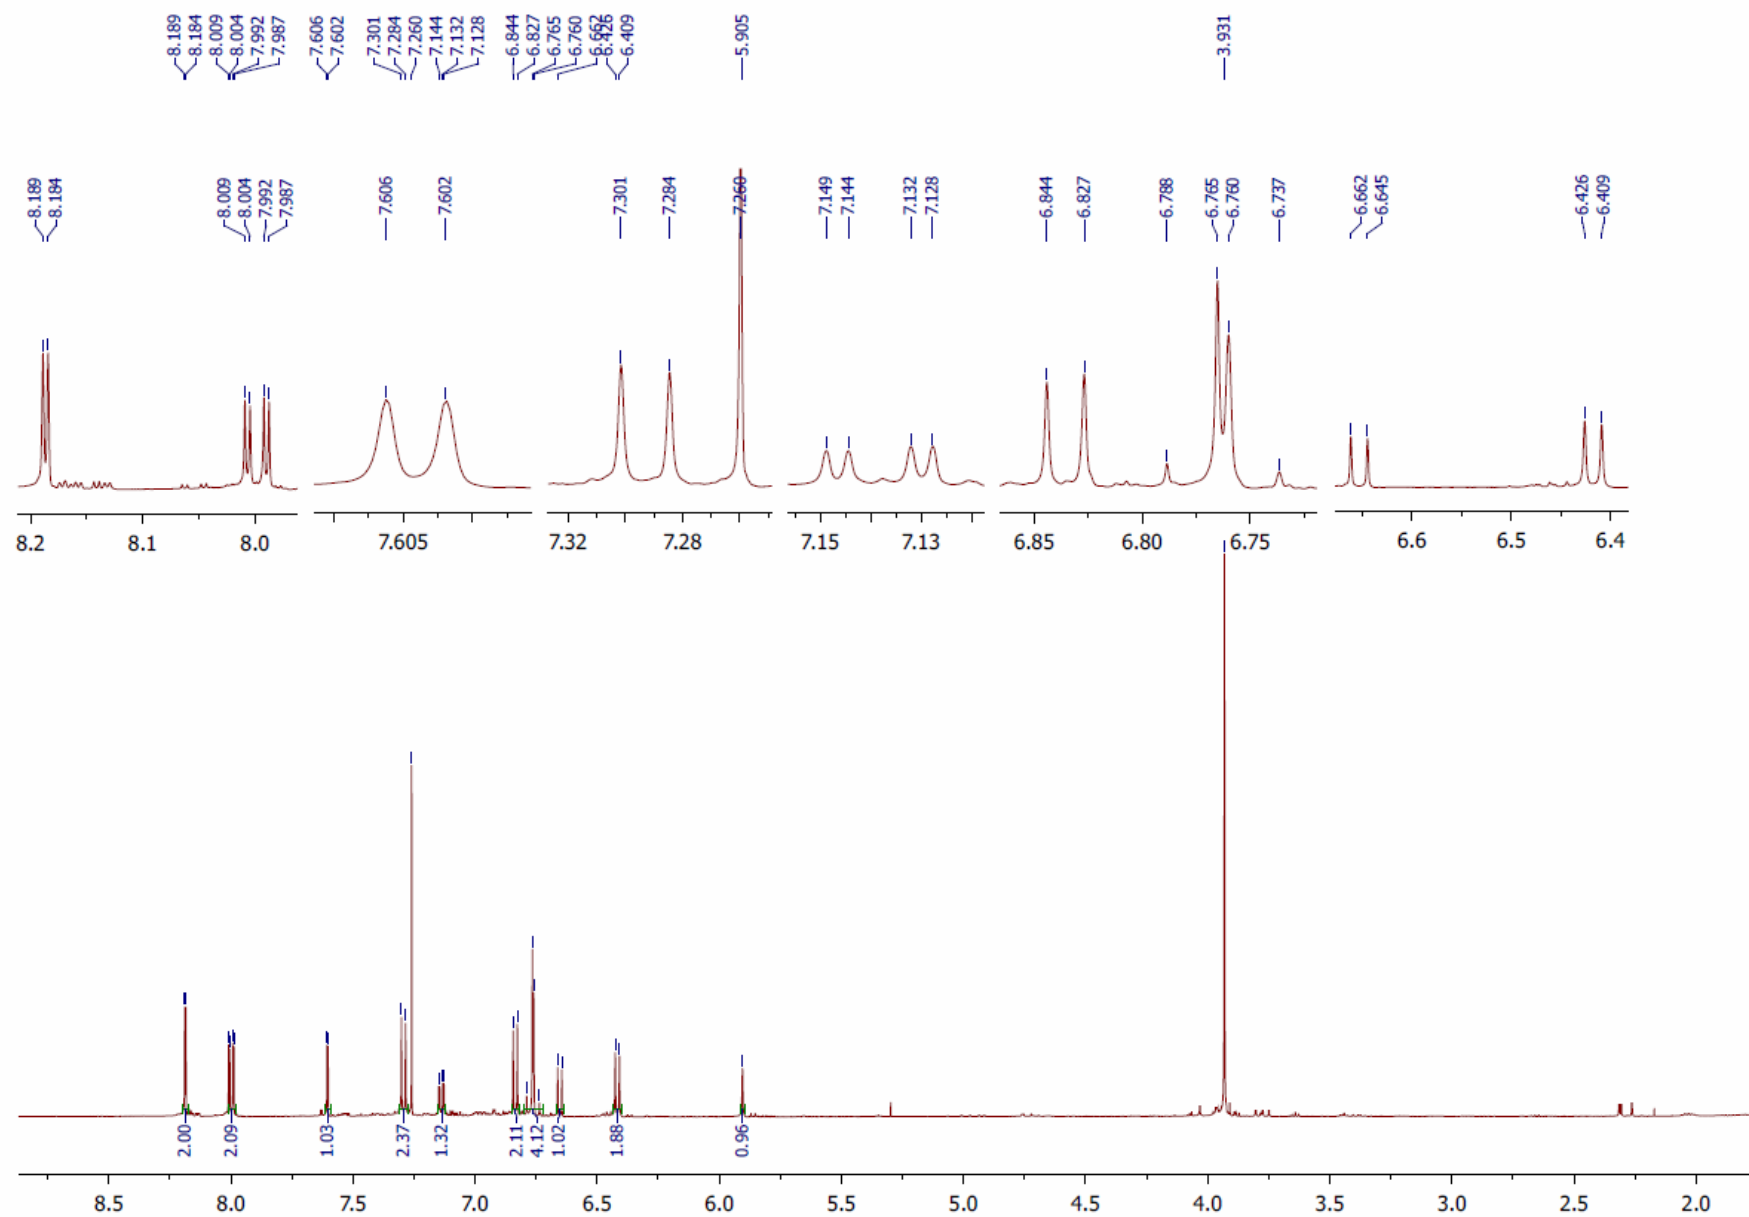

**$^{13}\text{C}$  NMR of compound (5e):**

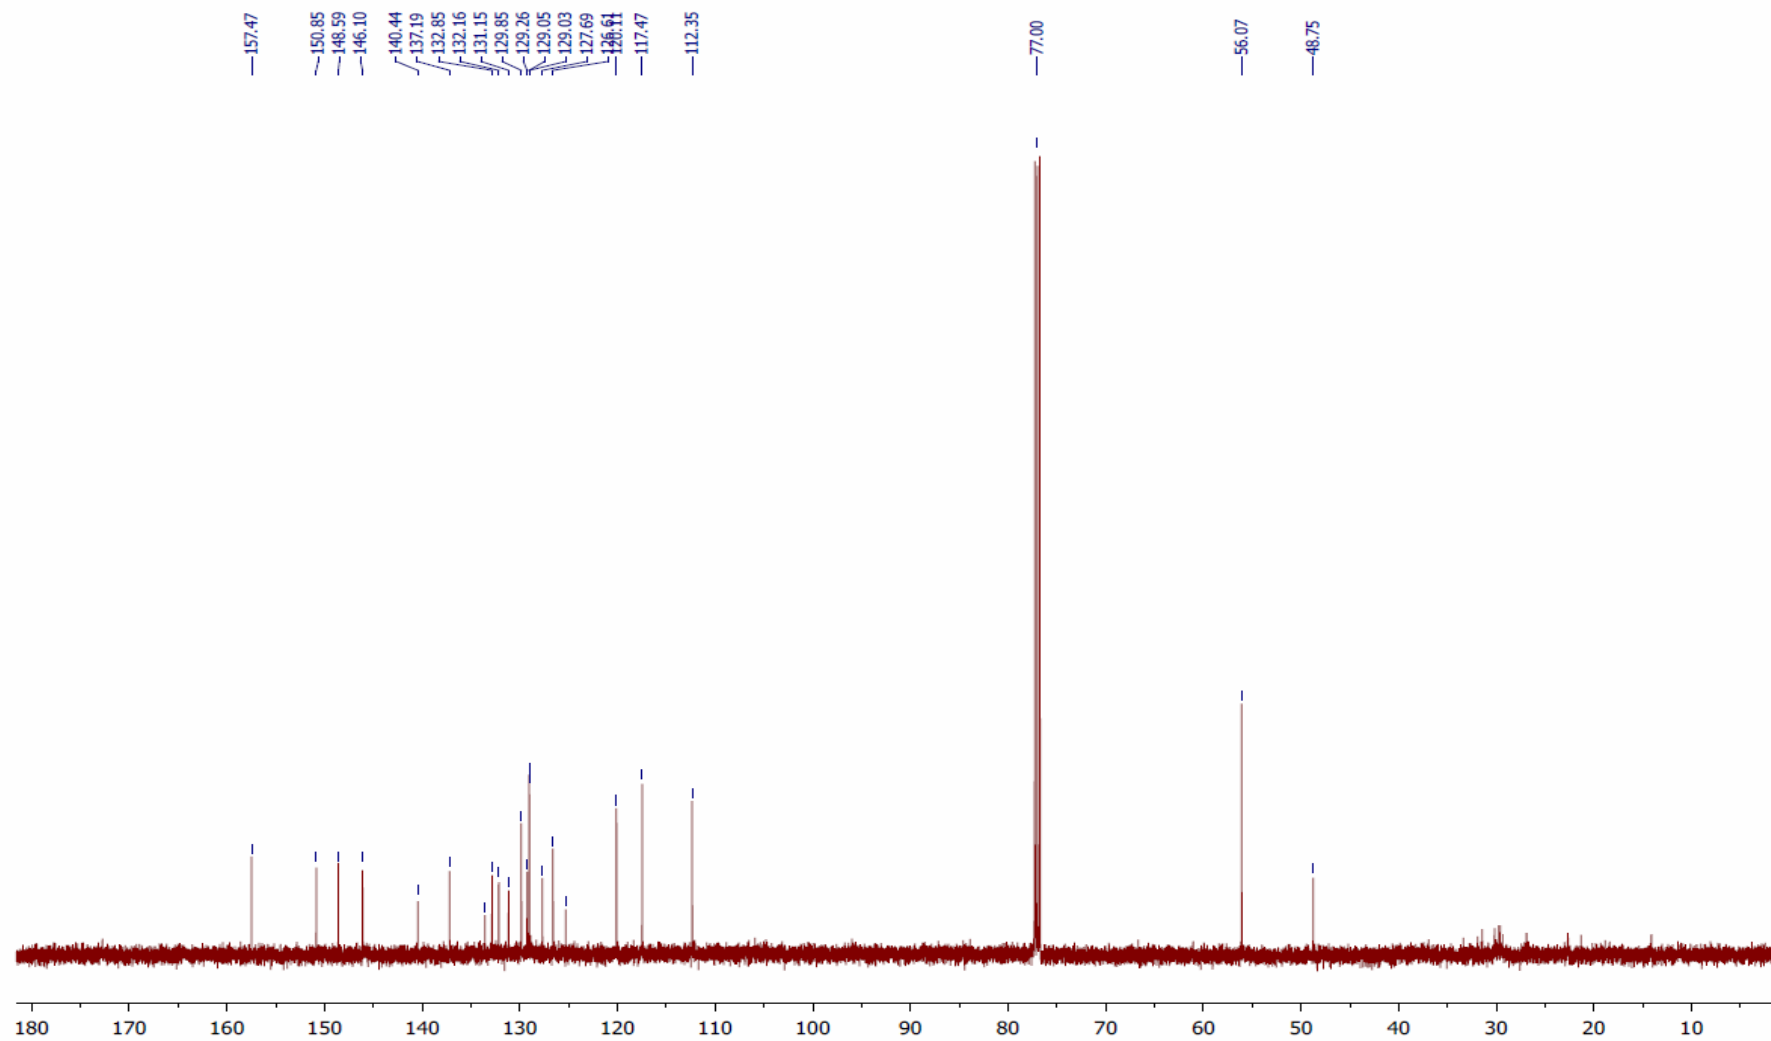



**$^1\text{H}$  NMR of compound (5f):**

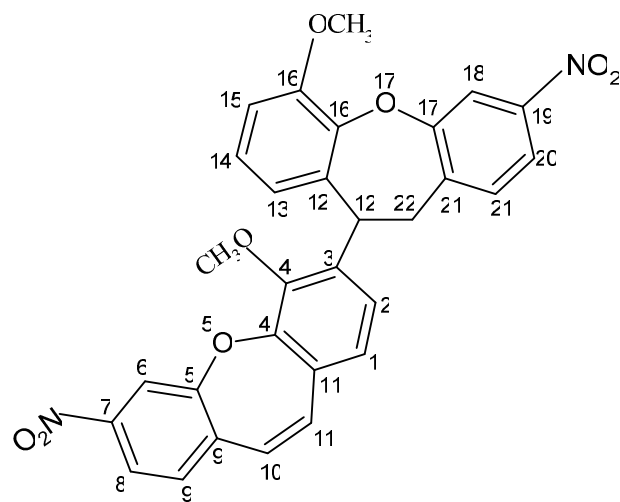

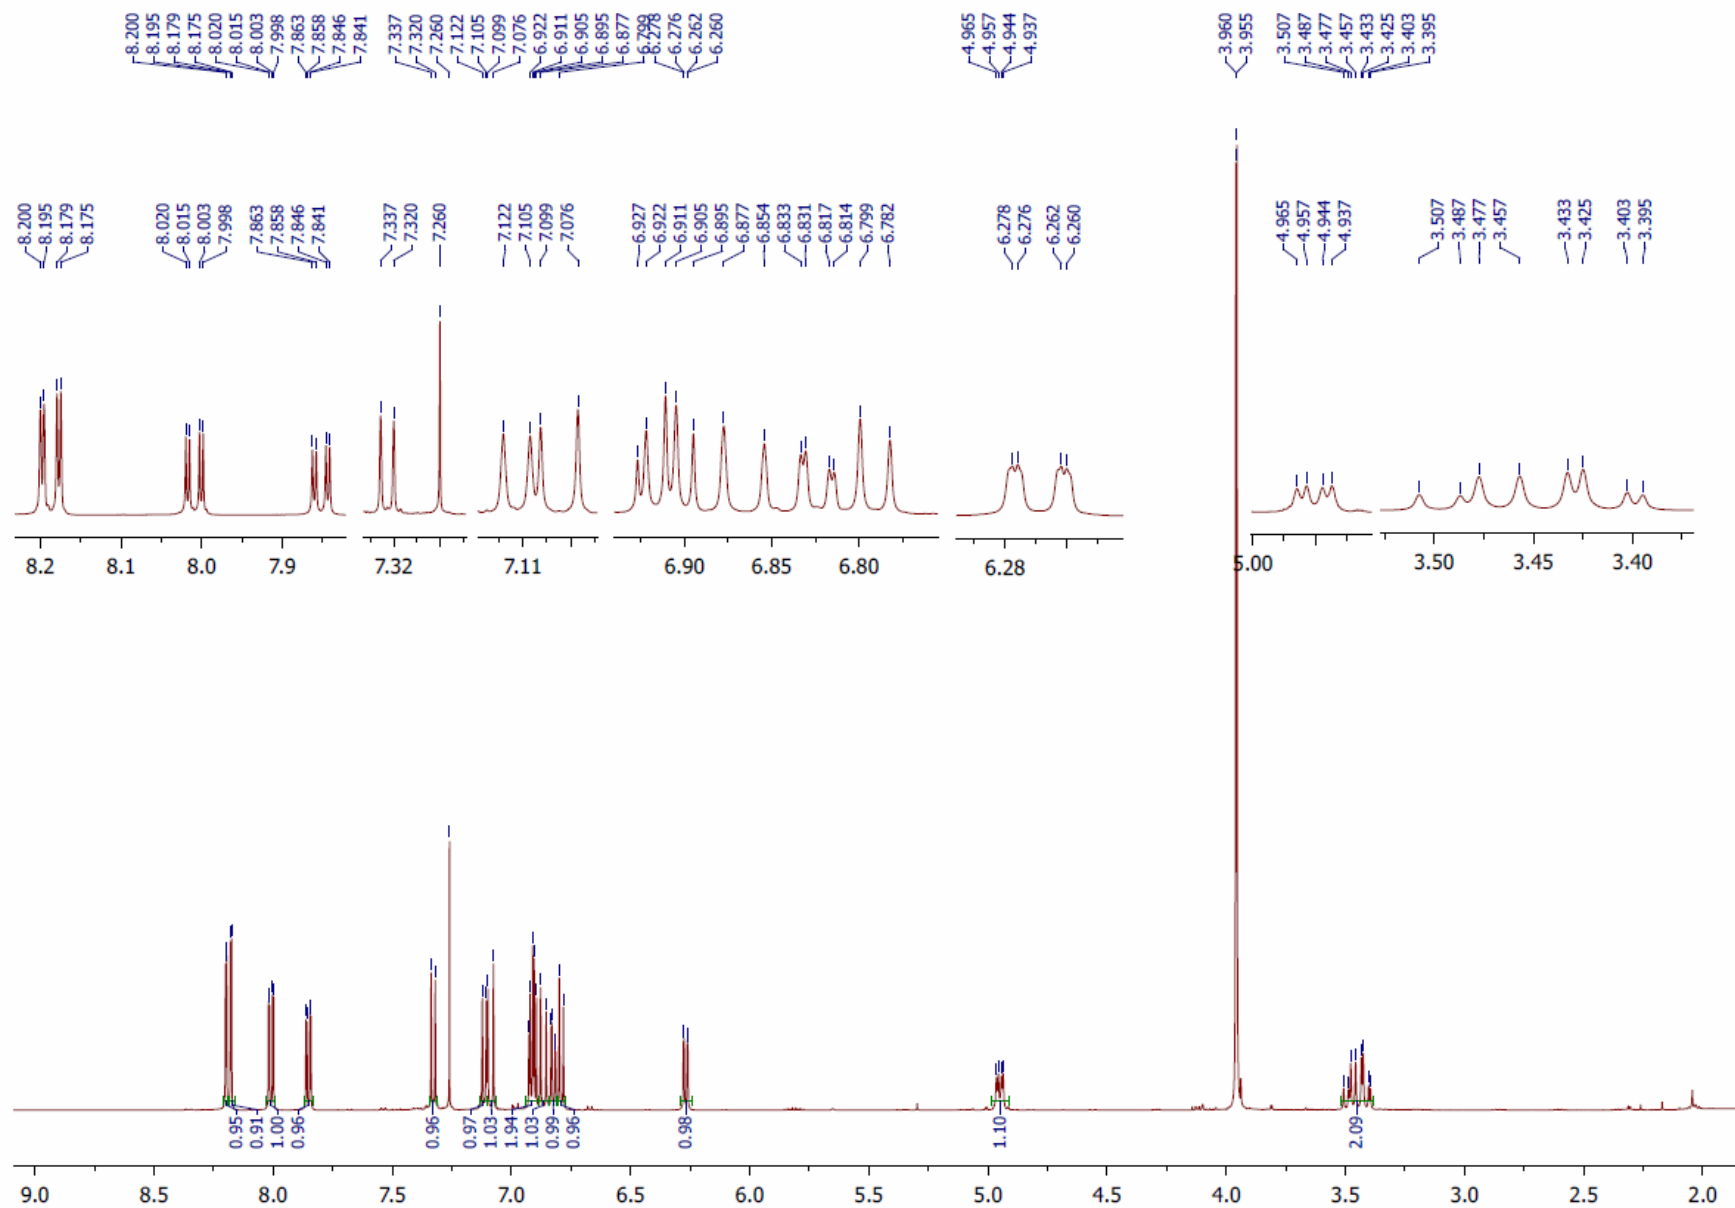

**$^{13}\text{C}$  NMR of compound (5f):**

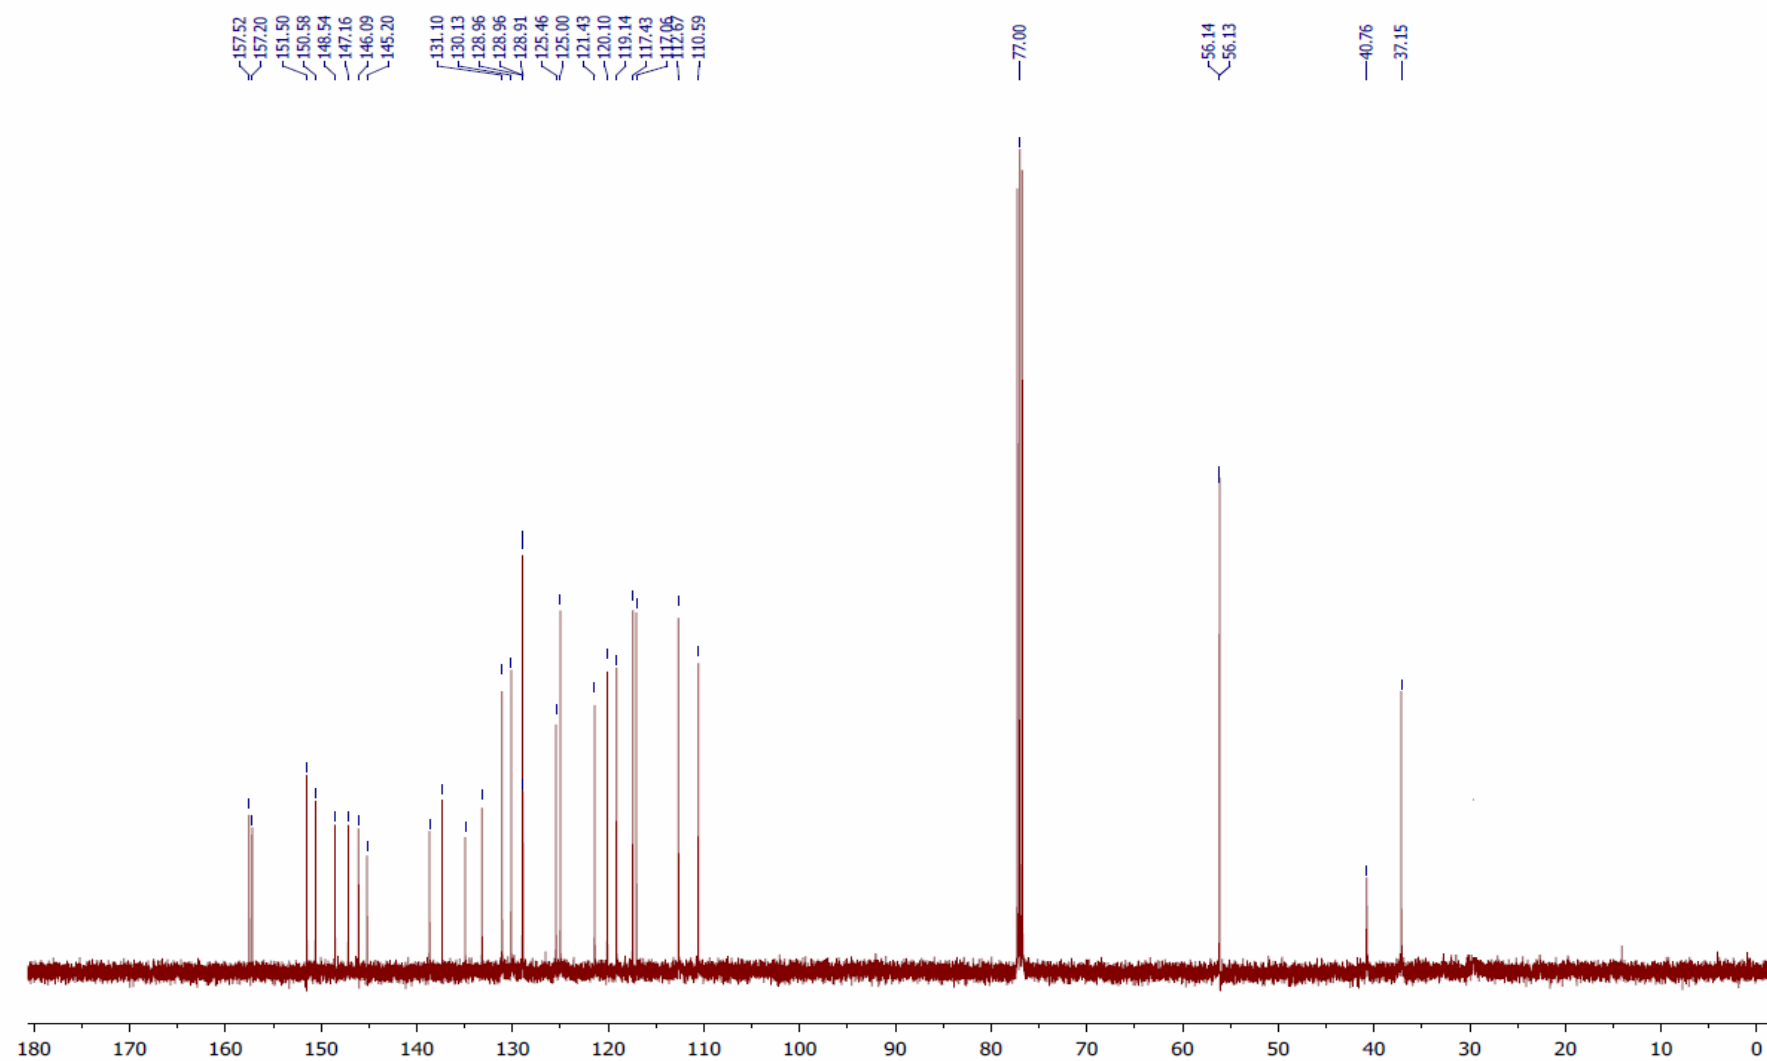

**Copies of  $^1\text{H}$  NMR and  $^{13}\text{C}$  NMR spectra of (6a-b)**

**<sup>1</sup>H NMR of compound (6a):**

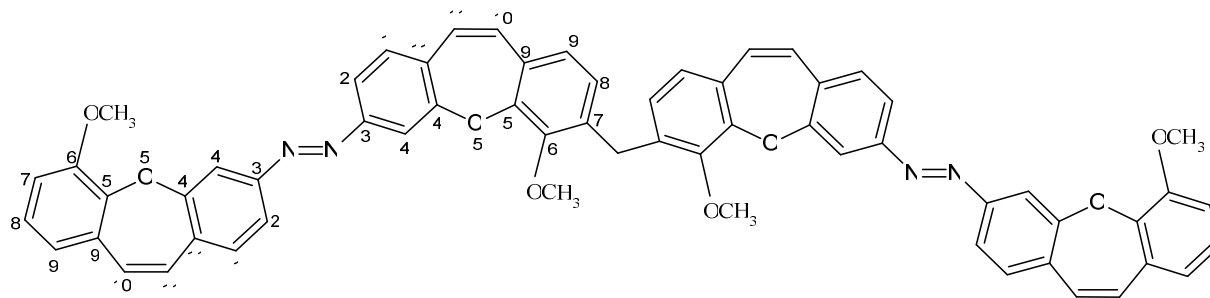

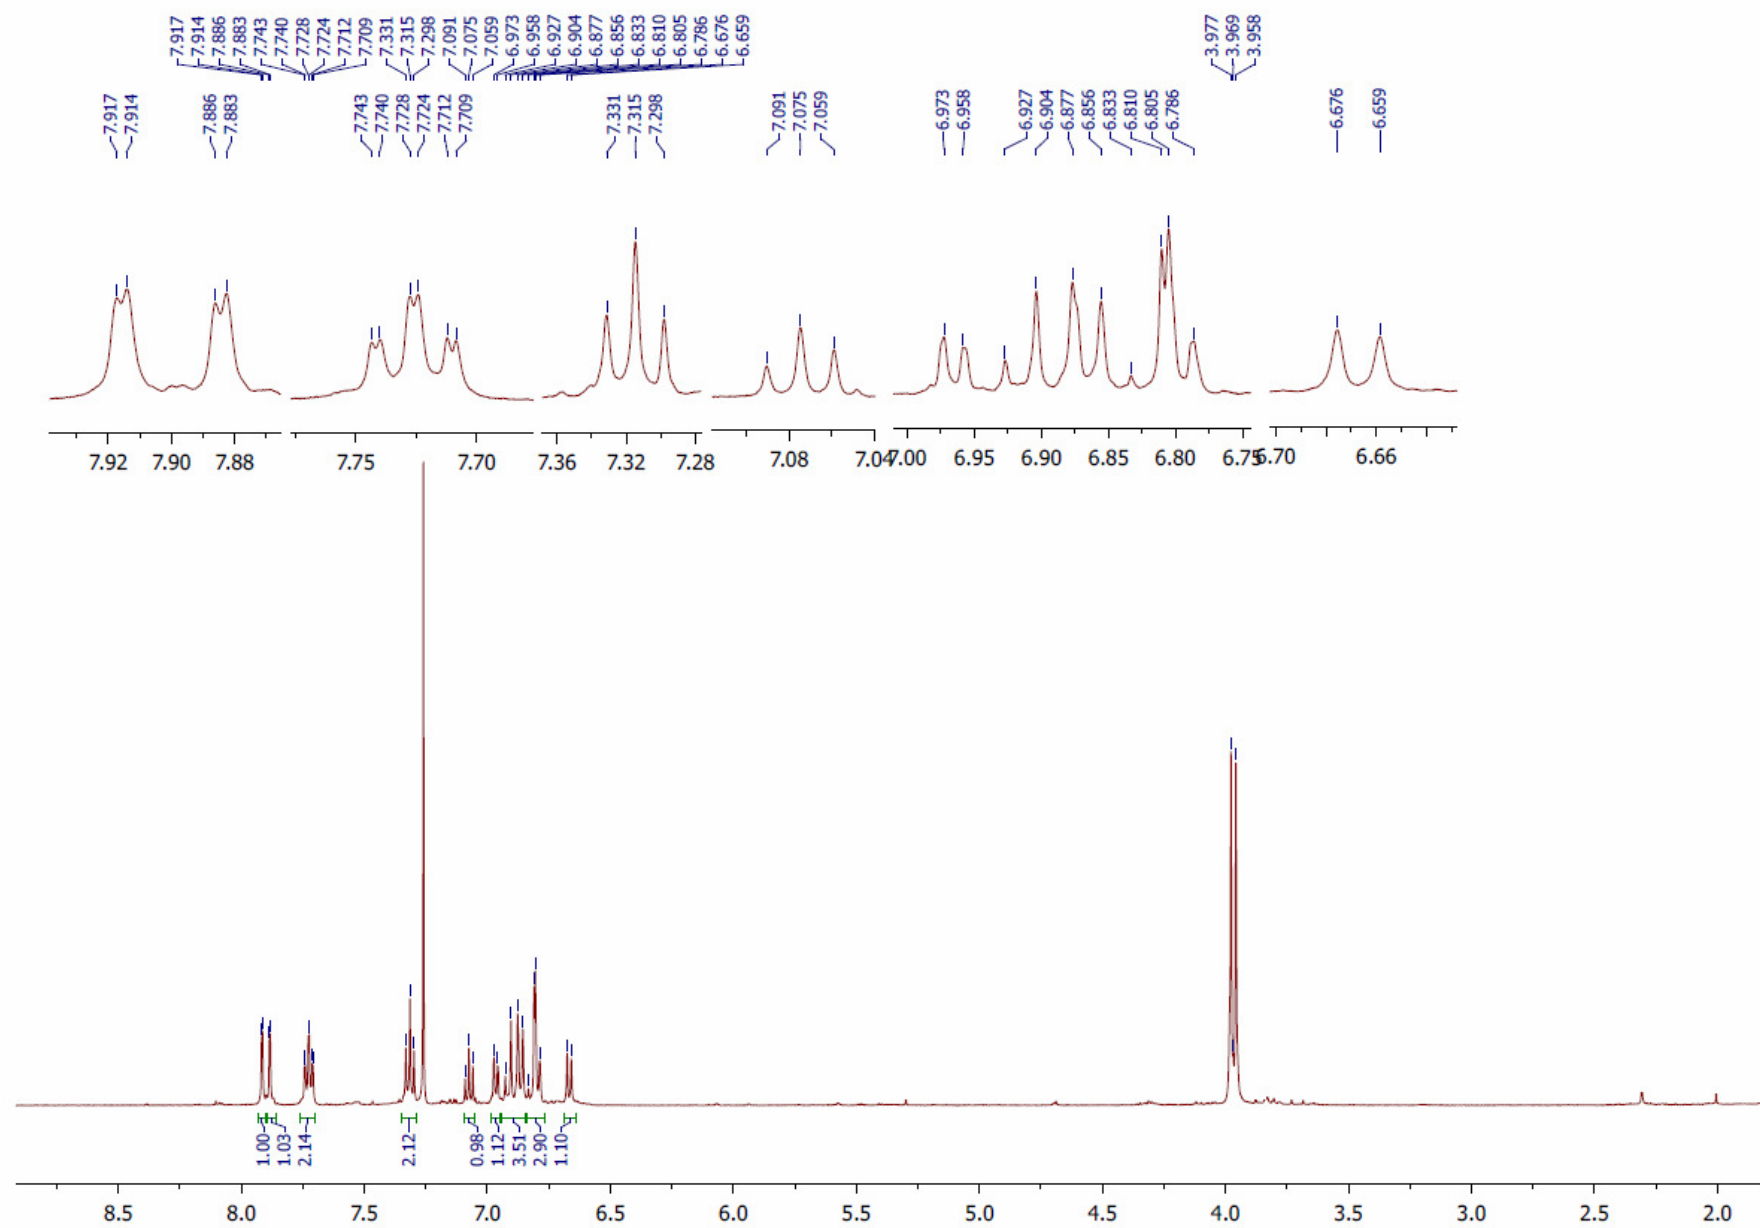

**$^{13}\text{C}$  NMR of compound (6a):**

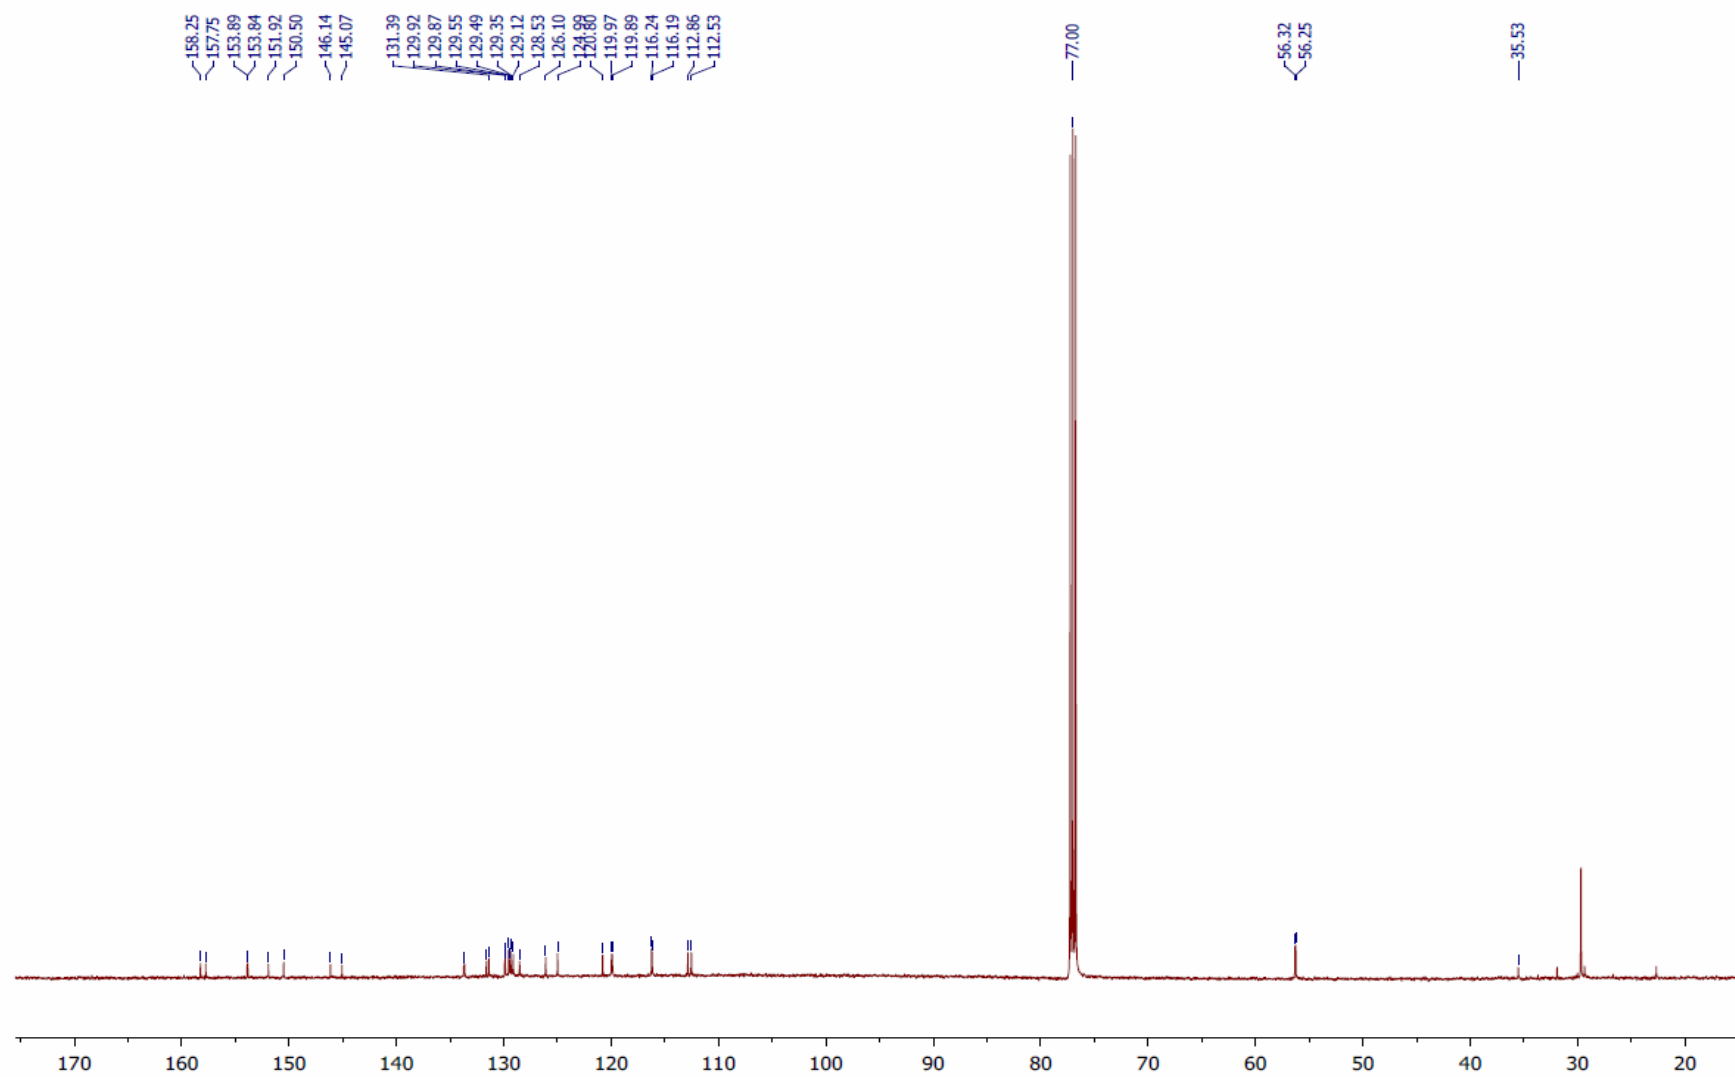

**<sup>1</sup>H NMR of compound (6b):**

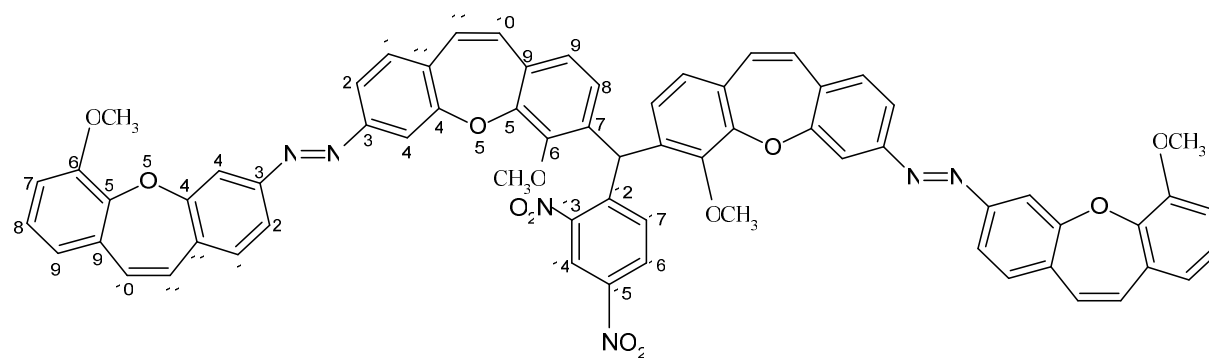

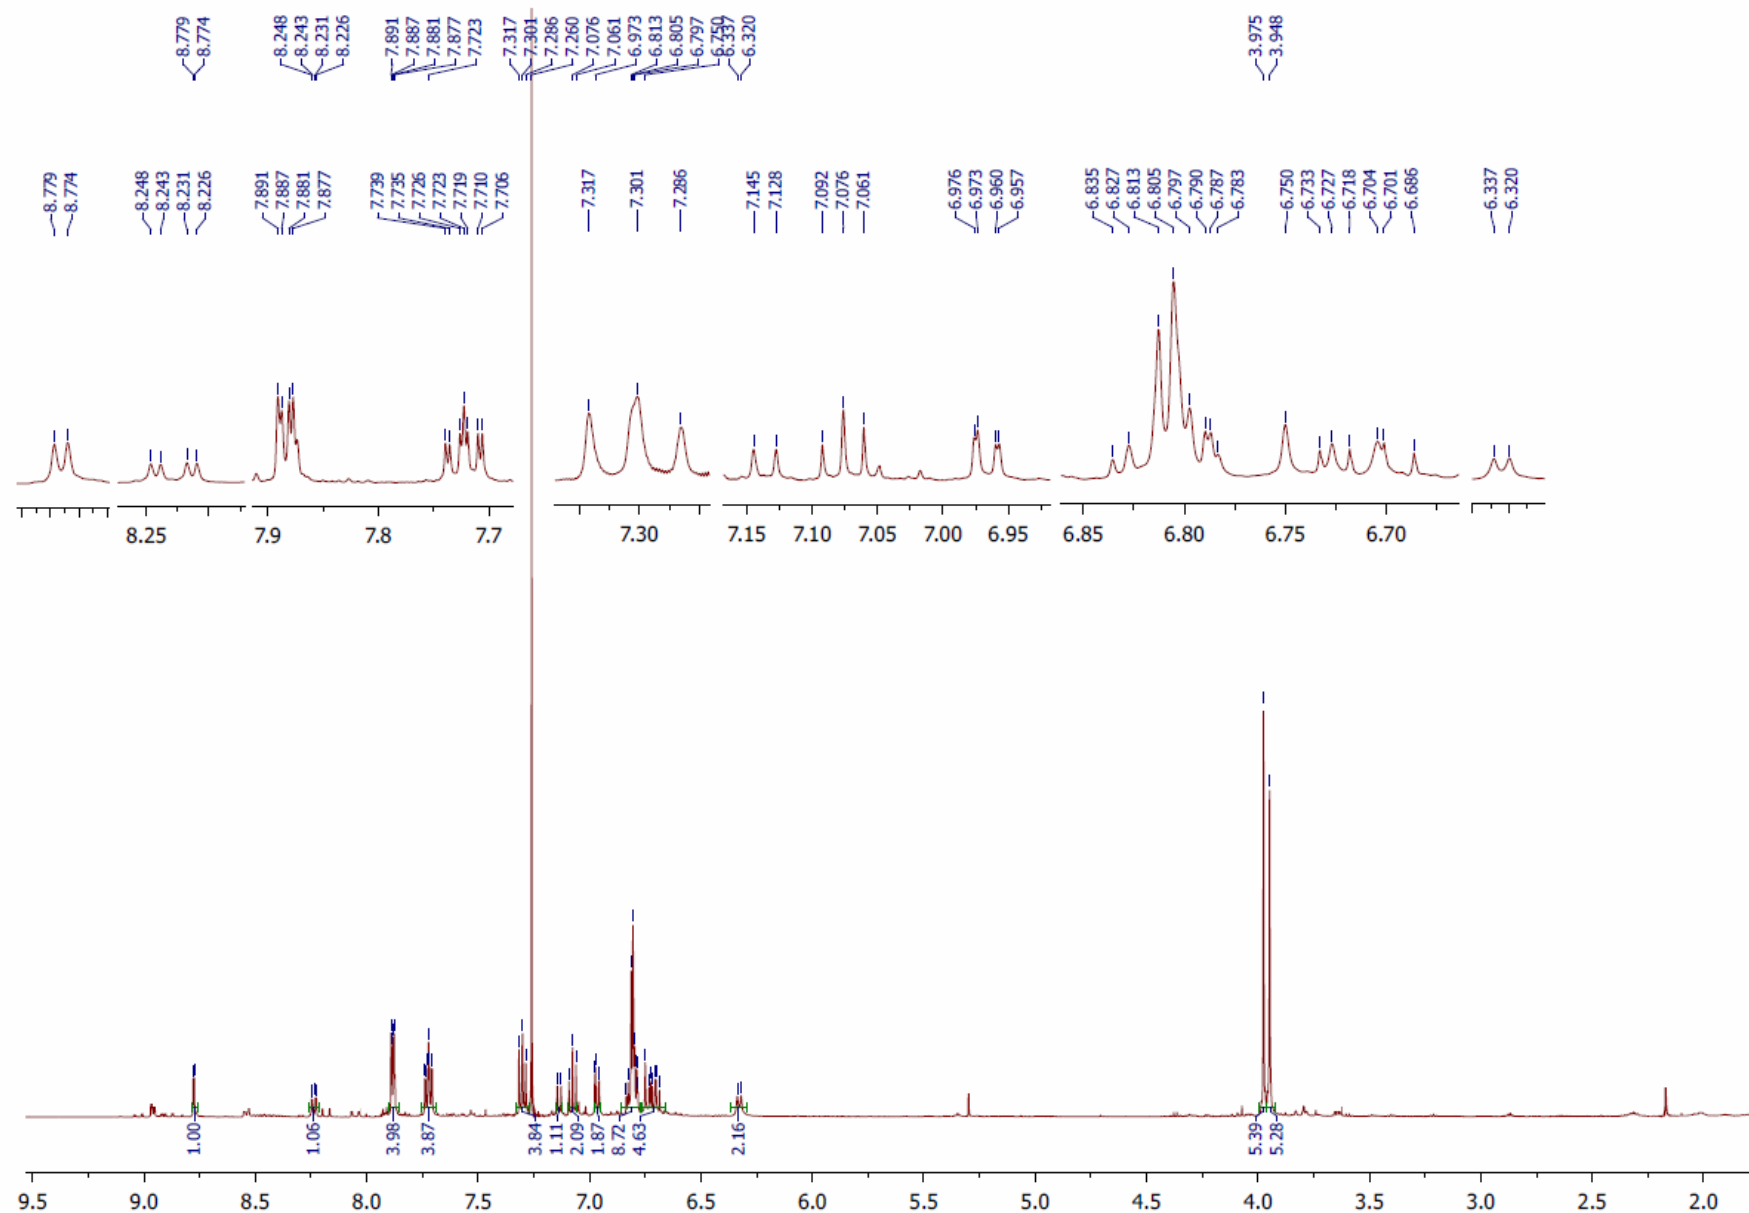



**$^{13}\text{C}$  NMR of compound (6b):**

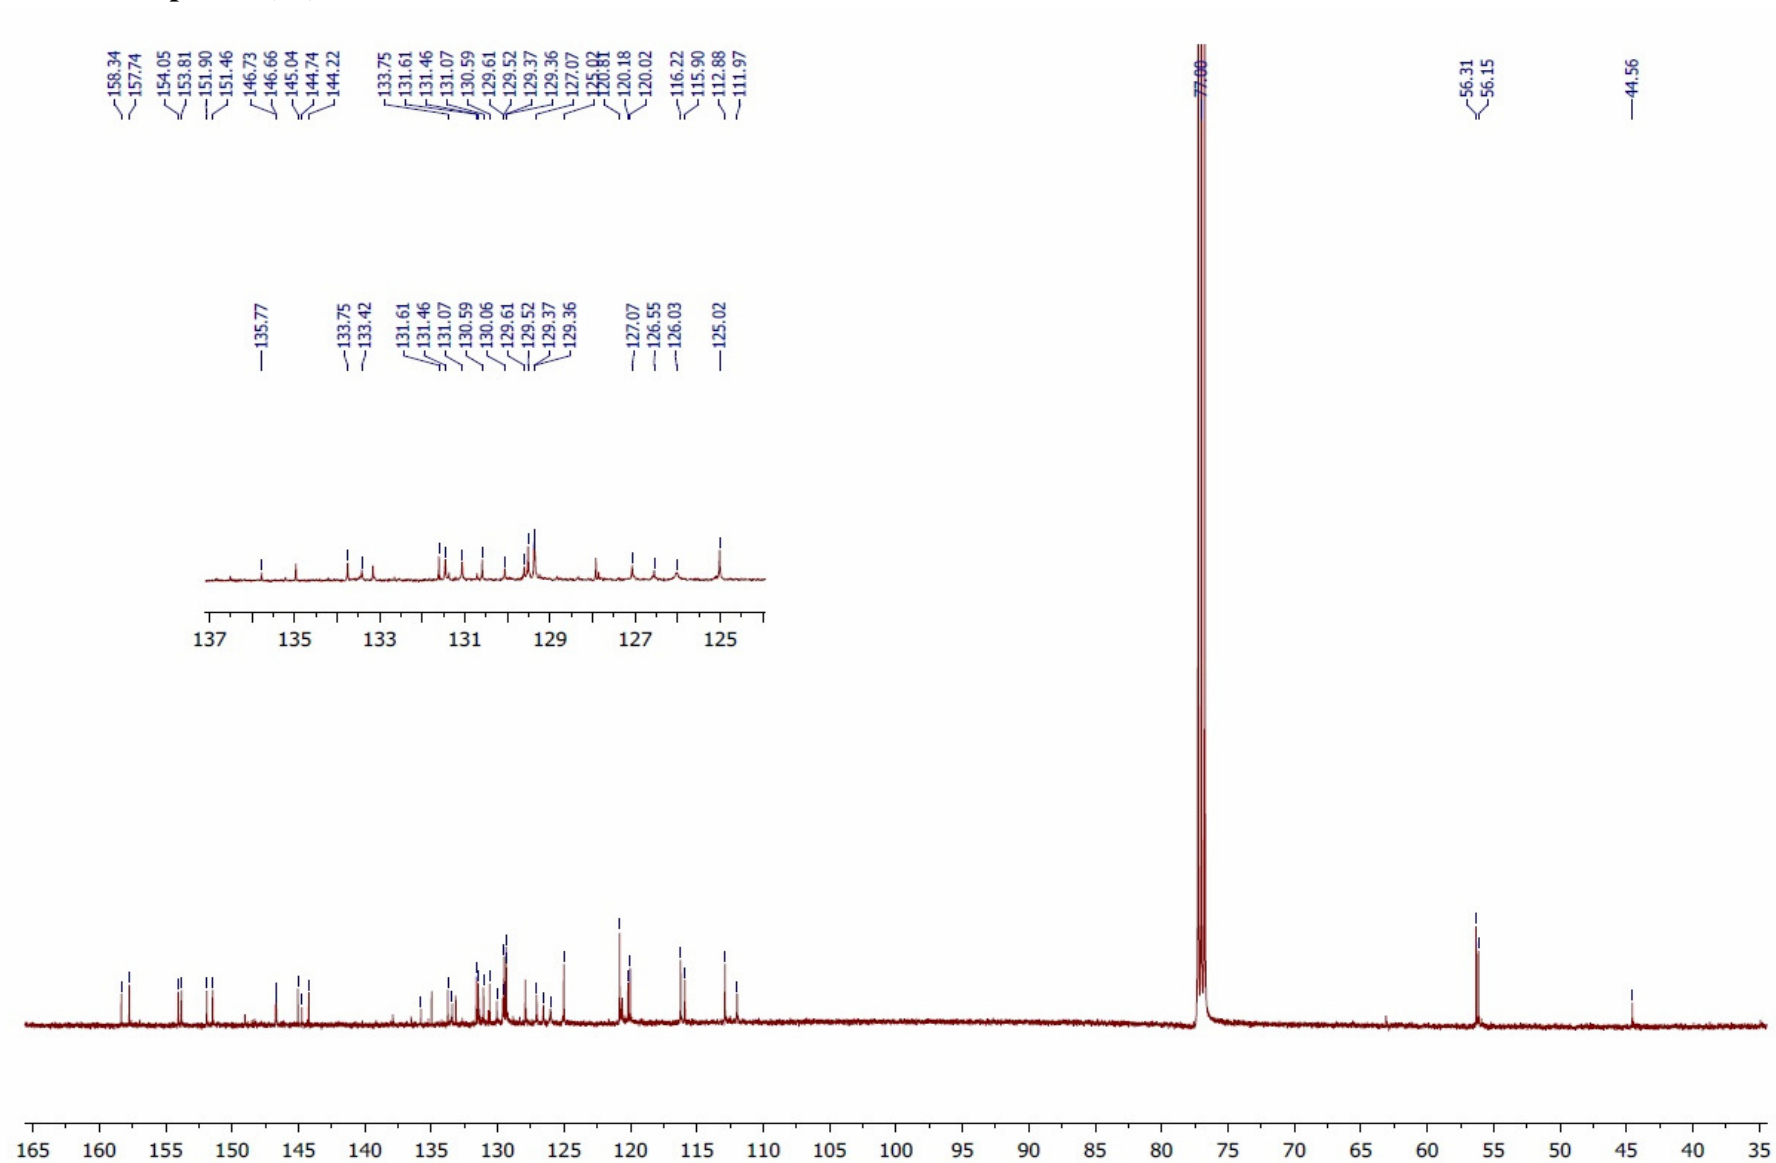

**$^1\text{H}$  NMR of compound (7):**

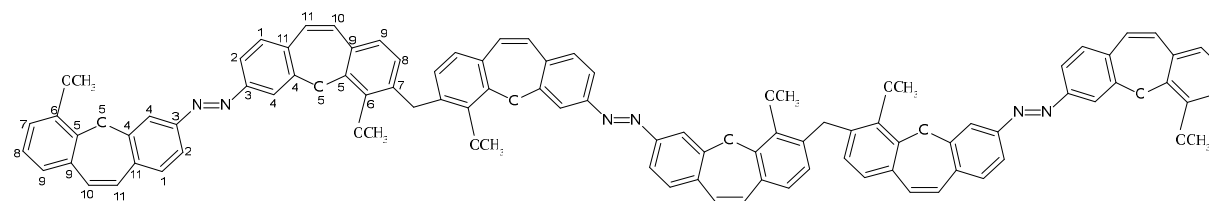

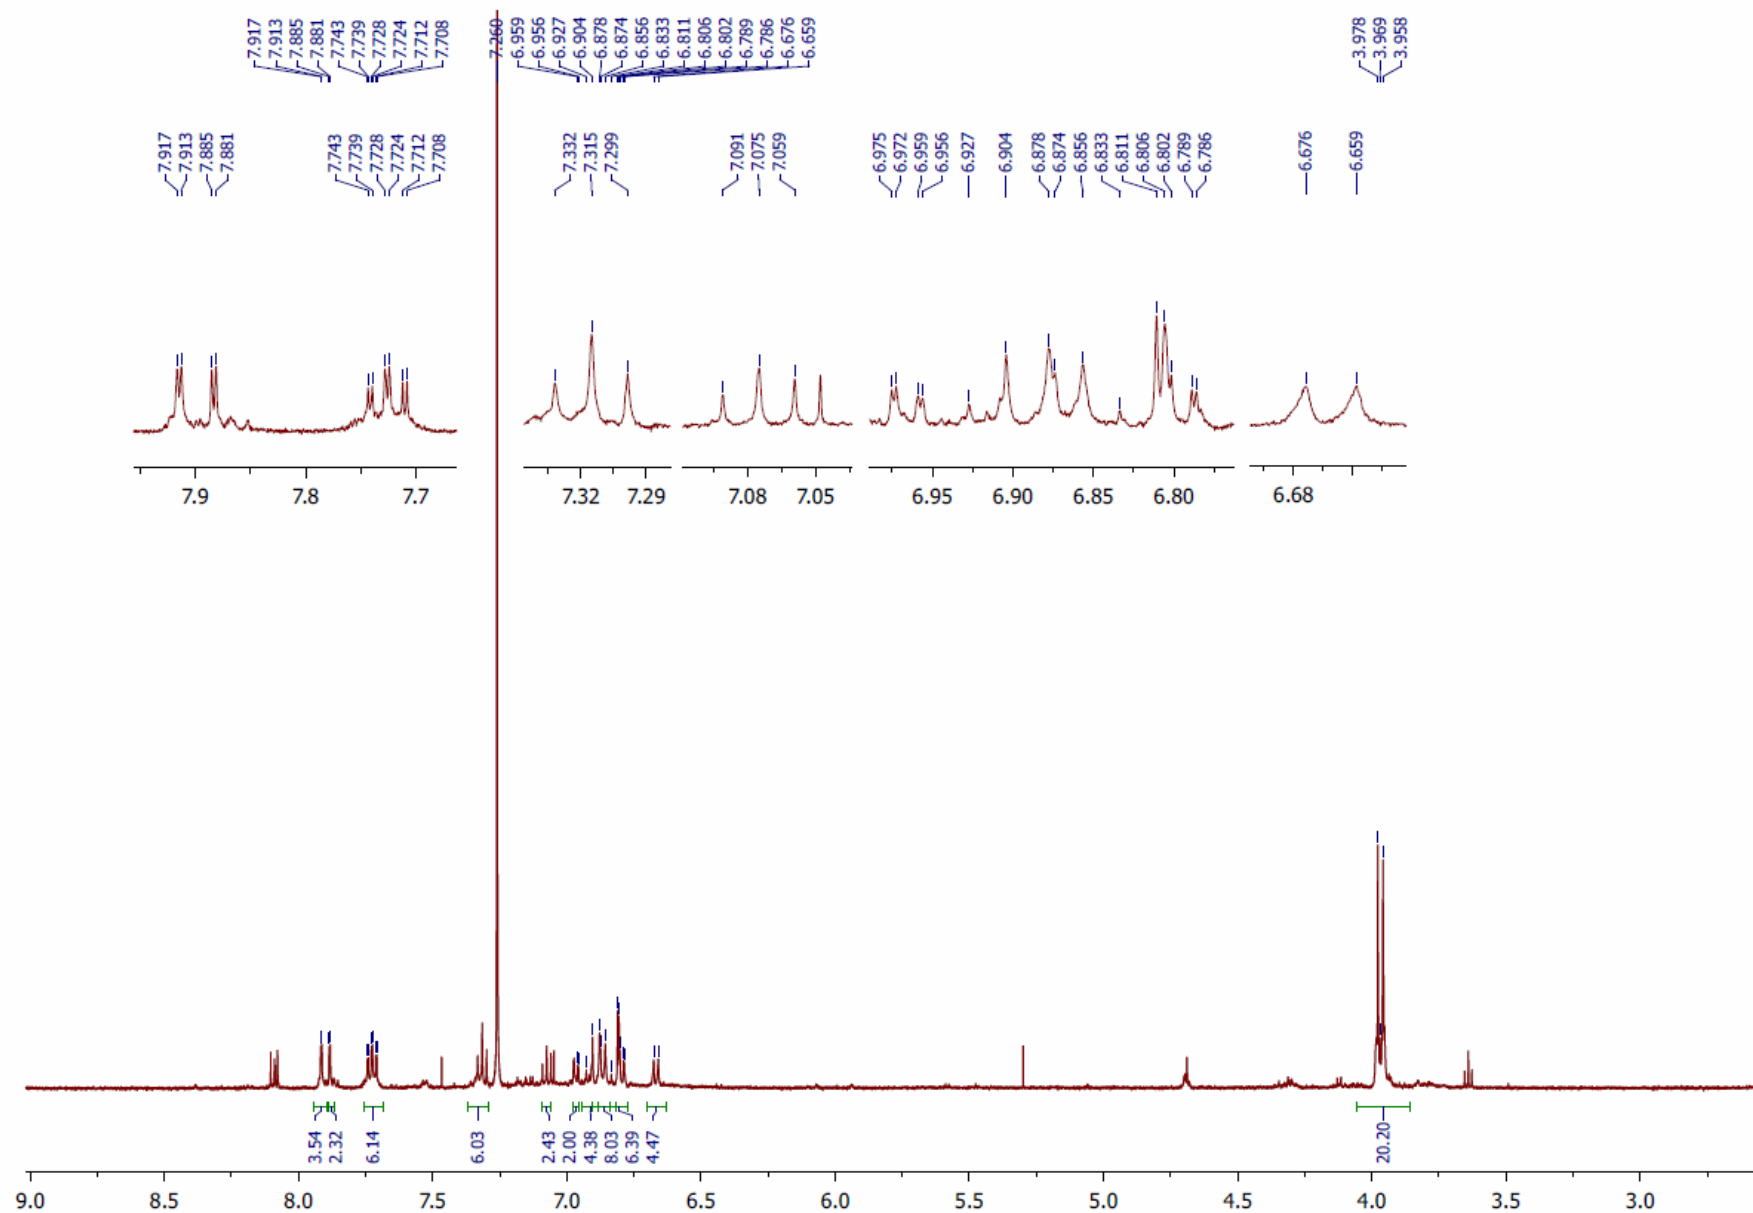

**$^1\text{H}$  NMR of compound (8):**

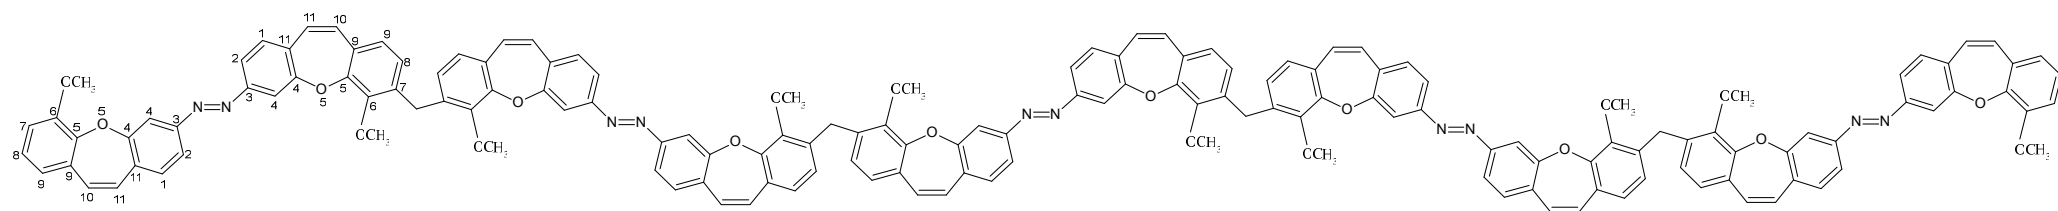

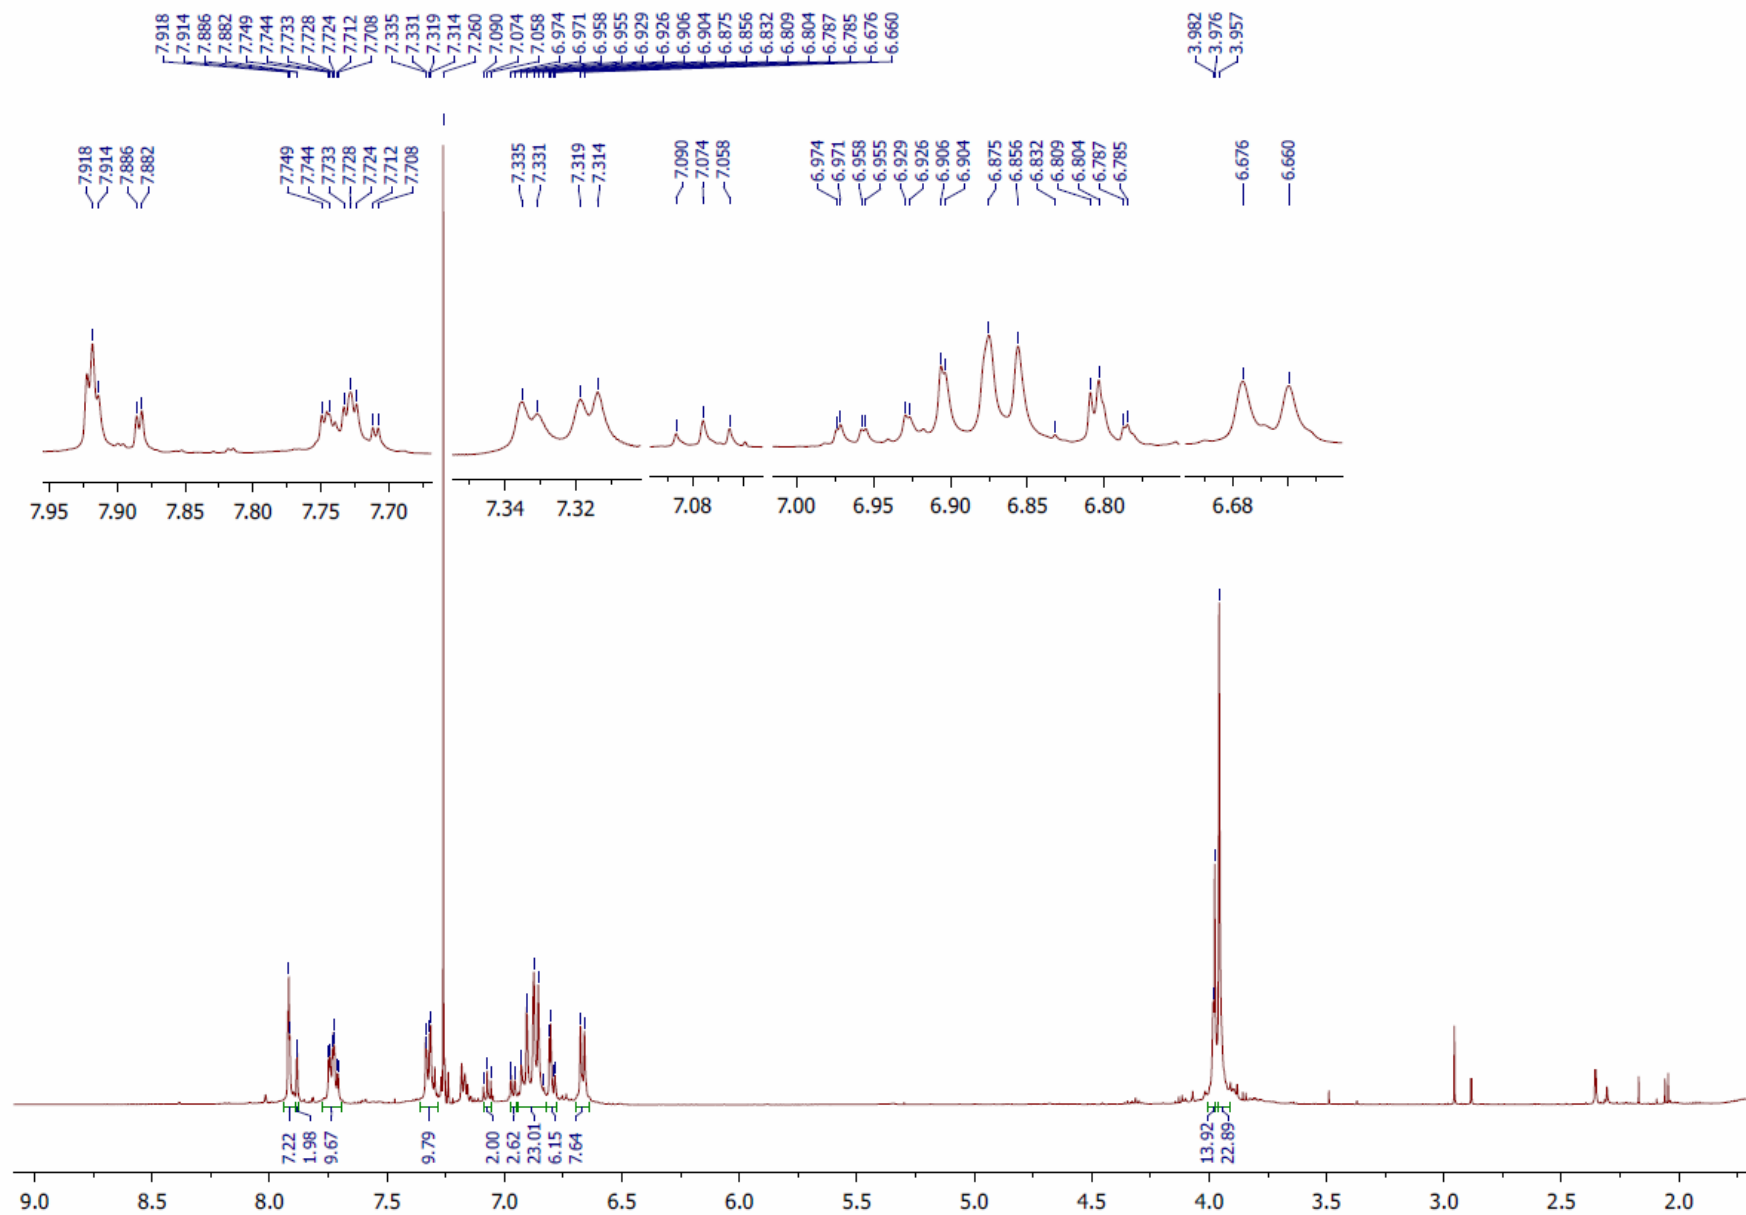

**$^{13}\text{C}$  NMR of compound (8):**

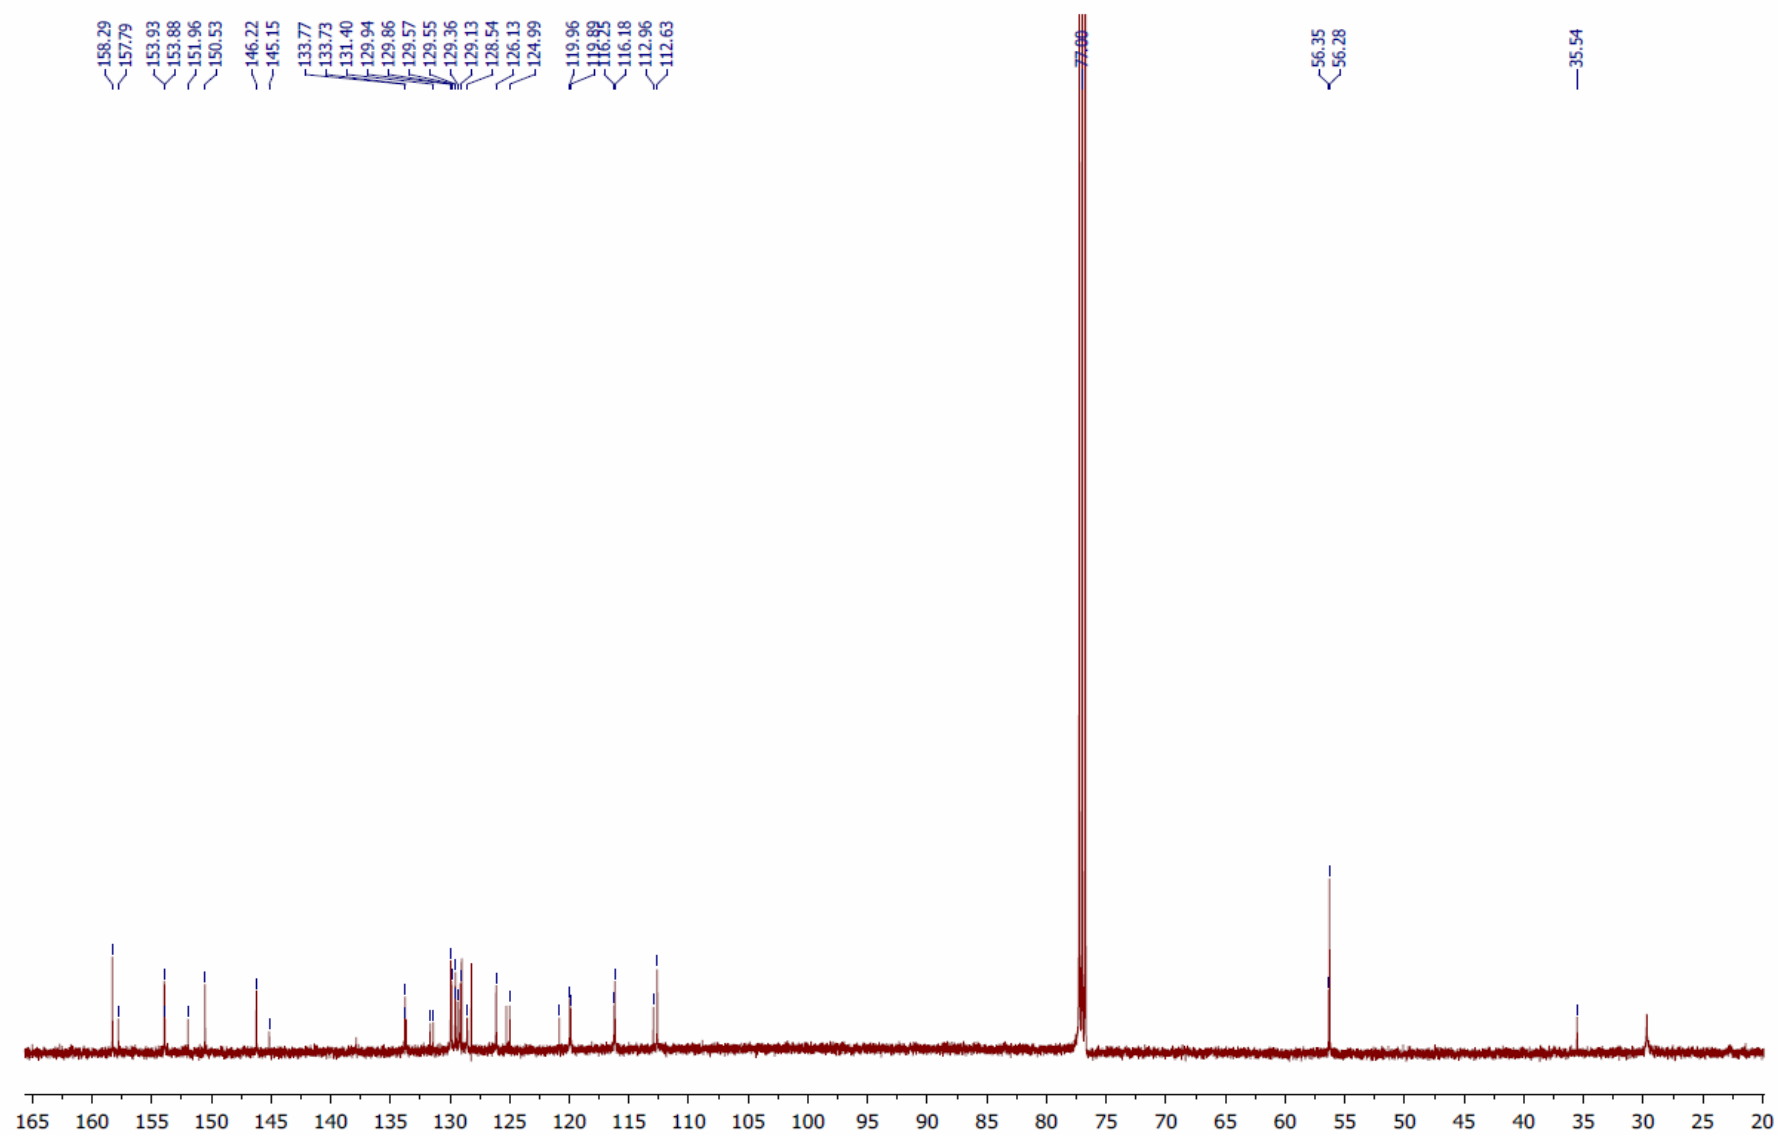

**Table S2.** The maximum for transitions  $\pi-\pi^*$  of compounds (**2a,2b,2e-2g**).

| compound                                                                                      | $\lambda_{\max}$ [nm] |
|-----------------------------------------------------------------------------------------------|-----------------------|
| <b>2a</b> 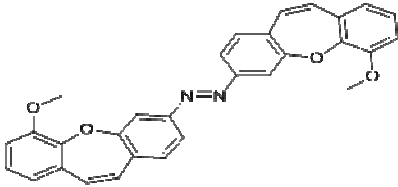   | 409                   |
| <b>2b</b>    | 434                   |
| <b>2e</b>    | 314, 446              |
| <b>2f</b>  | 371                   |
| <b>2g</b>  | 400                   |

## References

---

- [1] M.J. Frisch, G.W. Trucks, H.B. Schlegel, G.E. Scuseria, M.A. Robb, J.R. Cheeseman, J.A. Montgomery, T. Vreven, K.N. Kudin, J.C. Burant, J.M. Millam, S.S. Iyengar, J. Tomasi, V. Barone, B. Mennucci, M. Cossi, G. Scalmani, N. Rega, G.A. Petersson, H. Nakatsuji, M. Hada, M. Ehara, K. Toyota, R. Fukuda, J. Hasegawa, M. Ishida, T. Nakajima, Y. Honda, O. Kitao, H. Nakai, M. Klene, X. Li, J.E. Knox, H.P. Hratchian, J.B. Cross, V. Bakken, C. Adamo, J. Jaramillo, R. Gomperts, R.E. Stratmann, O. Yazyev, A.J. Austin, R. Cammi, C. Pomelli, J.W. Ochterski, P.Y. Ayala, K. Morokuma, G.A. Voth, P. Salvador, J.J. Dannenberg, V.G. Zakrzewski, S. Dapprich, A.D. Daniels, M.C. Strain, O. Farkas, D.K. Malick, A.D. Rabuck, K. Raghavachari, J.B. Foresman, J.V. Ortiz, Q. Cui, A.G. Baboul, S. Clifford, J. Cioslowski, B.B. Stefanov, G. Liu, A. Liashenko, P. Piskorz, I. Komaromi, R.L. Martin, D.J. Fox, T. Keith, M.A. Al-Laham, C.Y. Peng, A. Nanayakkara, M. Challacombe, P.M.W. Gill, B. Johnson, W. Chen, M.W. Wong, C. Gonzalez, J.A. Pople, Gaussian Inc., Wallingford, CT, **2004** (Gaussian 03, Revision E.01).
- [2] J. Tomasi, B. Mennucci, R. Cammi, Quantum mechanical continuum solvation models, *Chem. Rev.* **2005**, *105*, 2999.
